1 **Condensin controls cellular RNA levels through the accurate**  
2 **segregation of chromosomes instead of directly regulating**  
3 **transcription**

4

5 Clémence Hocquet<sup>1,2,7</sup>, Xavier Robellet<sup>1,2,7</sup>, Laurent Modolo<sup>1,2</sup>, Xi-Ming Sun<sup>3,4</sup>, Claire Burny<sup>1,2</sup>, Sara  
6 Cuylen-Haering<sup>5</sup>, Esther Toselli<sup>1,2</sup>, Sandra Clauder-Münster<sup>6</sup>, Lars M. Steinmetz<sup>6</sup>, Christian H. Haering<sup>5</sup>,  
7 Samuel Marguerat<sup>3,4</sup> and Pascal Bernard<sup>1,2,8</sup>

8

9 1. CNRS Laboratory of Biology and Modelling of the Cell (LBMC), 46 Allée d'Italie, 69007, Lyon, France

10 2. Université de Lyon, ENSL, UCBL, 46 Allée d'Italie, 69007, Lyon, France

11 3. MRC London Institute of Medical Sciences (LMS), Du Cane Road, London W12 0NN, UK

12 4. Institute of Clinical Sciences (ICS), Faculty of Medicine, Imperial College London, Du Cane Road,  
13 London W12 0NN, UK

14 5. Cell Biology and Biophysics Unit, Structural and Computational Biology Unit, European Molecular  
15 Biology Laboratory, Heidelberg, Germany

16 6. Genome Biology Unit, European Molecular Biology Laboratory, Heidelberg, Germany.

17

18

19 7. These authors contributed equally to this work

20 8. Corresponding author

21

22 **Abstract**

23 Condensins are genome organisers that shape chromosomes and promote their accurate transmission.  
24 Several studies have also implicated condensins in gene expression, although the mechanisms have  
25 remained enigmatic. Here, we report on the role of condensin in gene expression in fission and budding  
26 yeasts. In contrast to previous studies, we provide compelling evidence that condensin plays no direct  
27 role in the maintenance of the transcriptome, neither during interphase nor during mitosis. We further  
28 show that the changes in gene expression in post-mitotic fission yeast cells that result from condensin  
29 inactivation are largely a consequence of chromosome missegregation during anaphase, which notably  
30 depletes the RNA-exosome from daughter cells. Crucially, preventing karyotype abnormalities in  
31 daughter cells restores a normal transcriptome despite condensin inactivation. Thus, chromosome  
32 instability, rather than a direct role of condensin in the transcription process, changes gene expression.  
33 This knowledge challenges the concept of gene regulation by canonical condensin complexes.

34

35 *(149 words)*

36

## 37 Introduction

38 Structural Maintenance of Chromosomes (SMC) complexes are ring-shaped ATPases, conserved from  
39 bacteria to human, which shape chromosomes and ensure their accurate transmission during cell  
40 division (Hirano, 2016; Uhlmann, 2016). Eukaryotes possess three distinct SMC protein complexes,  
41 named condensins, cohesin and SMC5/6. Condensins structure and condense chromosomes, cohesin  
42 ensures sister-chromatid cohesion and organises topological domains in the genome during  
43 interphase, and SMC5/6 promotes proper DNA replication and repair (Hirano, 2016; Uhlmann, 2016).  
44 A large body of in vivo and in vitro studies has substantiated the idea that SMC complexes shape the  
45 genome and preserve its integrity by encircling DNA helices and, at least partly, by extruding loops of  
46 DNA (Ganji et al., 2018; Gibcus et al., 2018; Hirano, 2016; Uhlmann, 2016). Besides organising  
47 chromosomes, cohesin and condensins have also been widely implicated in the control of gene  
48 expression, raising the idea that the two complexes link gene expression to chromosome architecture  
49 (Downen and Young, 2014). Yet, while our understanding of gene regulation by cohesin has progressed  
50 during the last decade (Merkenschlager and Nora, 2016), the mechanisms through which condensins  
51 impact on gene expression have remained largely enigmatic.

52 Condensins have been best characterised as the key drivers of the assembly of mitotic chromosomes  
53 (Gibcus et al., 2018; Hirano, 2016; Robel let et al., 2017). The profound reorganisation of chromatin  
54 fibres into compact and individualised rod-shaped chromosomes, that marks the entry into mitosis, is  
55 essential for the accurate transmission of the genome during anaphase. When condensins are  
56 impaired, sister-centromeres migrate towards the opposite pole of the mitotic spindle upon anaphase  
57 onset, but chromosome arms remain entangled and hence fail to separate, leading to the formation  
58 of sustained anaphase chromatin bridges and DNA breakage in telophase and in post-mitotic cells  
59 (Cuylen et al., 2013; Hyun-Soo Kim et al., 2009; Samoshkin et al., 2012; Sutani et al., 1999; Toselli-  
60 Mollereau et al., 2016; Woodward et al., 2016).

61 Like all SMC complexes, condensins are made of two ATPases, called SMC2<sup>Cut14</sup> and SMC4<sup>Cut3</sup> (fission  
62 yeast names are indicated in superscript), associated with three non-SMC subunits that regulate the  
63 ATPase activity of the holocomplex and govern its association with DNA (Kschonsak et al., 2017). Most  
64 eukaryotes possess two condensins, called condensin I and II, which are composed of a same  
65 SMC2/SMC4 heterodimer but are associated with two different sets of regulatory subunits (Hirano,  
66 2016; Robellet et al., 2017). Despite their structural and functional similarities, the dynamics of  
67 association of condensin I and II with chromosomes differ (Walther et al., 2018). Condensin II is nuclear  
68 during interphase and enriched on chromosomes from prophase until telophase. Condensin I, in  
69 contrast, is mostly cytoplasmic during interphase and associates with chromosomes from

70 prometaphase until telophase. A third condensin variant called the Dosage Compensation Complex  
71 (DCC) has been described in the worm *Caenorhabditis elegans*, which associates with the two X  
72 chromosomes in hermaphrodite animals and halves the expression of X-linked genes by reducing the  
73 occupancy of RNA polymerase II (RNA Pol II) (Kruesi et al., 2013). Yeasts, in contrast, possess a unique  
74 condensin complex, similar in term of primary sequence to condensin I.

75 Condensin I and II have been implicated in the control of gene expression in various organisms, ranging  
76 from yeasts to human. In the budding yeast *Saccharomyces cerevisiae*, the silencing of  
77 heterochromatic mating type genes and the position effect exerted by repetitive ribosomal DNA are  
78 both alleviated when condensin is impaired (Bhalla et al., 2002; Wang et al., 2016). Likewise, in the  
79 fission yeast *Schizosaccharomyces pombe*, the SMC4<sup>Cut3</sup> subunit of condensin is needed to repress  
80 tRNAs genes as well as reporter genes inserted into the pericentric DNA repeats that are coated with  
81 heterochromatin (He et al., 2016; Iwasaki et al., 2010). It remains unclear, however, in which cell cycle  
82 phase and through which mechanism budding and fission yeast condensins regulate the expression of  
83 such diverse genes in such different genomic contexts. In *C. elegans*, depletion of condensin II is linked  
84 to an increase in the expression of at least 250 genes, but this effect does not correlate with the  
85 occupancy of condensin II on chromosomes (Kranz et al., 2013). In *Drosophila melanogaster*, condensin  
86 I has been implicated in the repression of homeotic genes (Lupo et al., 2001), whereas condensin II has  
87 been reported to take part in the production of antimicrobial peptides (Longworth et al., 2012). Murine  
88 peripheral T cells that express a mutant version of the condensin II CAP-H2 regulatory subunit, exhibit  
89 a decreased compaction of chromatin and an increased expression of the proliferative gene *Cis*  
90 (Rawlings et al., 2011), suggesting a possible mechanistic relationship between condensin-mediated  
91 chromosome organisation and gene expression. However, another study reported that the same CAP-  
92 H2 mutation led to only subtle effects on the transcriptome of precursor thymocytes, which might be  
93 caused by chromosomal instability (Woodward et al., 2016).

94 Perhaps more consistent with a direct role, condensin I was found associated with active promoters  
95 during M phase in chicken DT40 cells, and its depletion prior to mitotic entry coincided with a  
96 decreased expression during the subsequent G1 phase of a subset of genes to which it was bound to  
97 (Kim et al., 2013). Similarly, cohesin and condensin II have been detected at super-enhancers in rapidly  
98 proliferating mouse embryonic stem cells, and depleting condensin II has been associated with a  
99 reduced expression of cell-identity genes driven by these super-enhancers (Downen et al., 2013). Yuen  
100 et al. observed a similar effect on the expression of highly-expressed housekeeping genes in mouse  
101 embryonic stem cells and human embryonic kidney cells (Yuen et al., 2017). Finally, it has been  
102 reported that not only condensin II, but also condensin I, binds enhancers activated by  $\beta$ -estradiol  
103 during interphase in human MCF7 breast adenocarcinoma cells, and that the depletion of condensin I

104 or II led to a reduced transcription of oestrogen-activated genes (Li et al., 2015). Intriguingly, the same  
105 enhancers were also found occupied by cohesin and to rely upon this complex to drive gene  
106 expression (Li et al., 2013).

107 All these studies tend to support the idea that condensin I and II play an important and evolutionarily-  
108 conserved role in gene expression, through which they impinge on cell identity, cell proliferation and,  
109 possibly, also immunity. Yet, no conclusive evidence has been provided thus far as to how condensin I  
110 and II might achieve this function. Mitotic chromosomes conserve considerable chromatin  
111 accessibility, similar to interphase chromatin (Hihara et al., 2012), and DNA remains accessible to  
112 transcription factors even in mitotic chromosomes that have been structured by condensin complexes  
113 (Chen et al., 2005; Palozola et al., 2017). Thus, it remains unclear whether and how mechanisms related  
114 to chromosome condensation could possibly underlie condensin-mediated gene regulation.  
115 Furthermore, given that the loss or gain of chromosomes is sufficient to alter gene expression (Sheltzer  
116 et al., 2012), it is crucial to determine to which extent the role attributed to condensin I and II in the  
117 control of gene expression is mechanistically different from, or related to, the assembly and  
118 segregation of chromosomes during mitosis.

119 Gene expression can be controlled at the transcriptional level, by changing the activity and/or the  
120 occupancy of RNA polymerases, as exemplified by condensin<sup>DCC</sup> (Kruesi et al., 2013). It can also be  
121 controlled at the co- or post-transcriptional level by modulating the half-life of transcripts (Buhler et  
122 al., 2007; Harigaya et al., 2006). The RNA-exosome is a conserved ribonuclease complex that ensures  
123 the maturation and the controlled degradation of a plethora of RNAs in the cell, including, for example,  
124 defective RNAs or cryptic unstable non-coding RNAs (Kilchert et al., 2016). The RNA-exosome consists  
125 of nine core subunits associated with the RNase Dis3 in the cytoplasm plus a second RNase, called  
126 Rrp6, in the nucleus (Kilchert et al., 2016). The mechanisms behind target recognition and processing  
127 or degradation modes selection by the RNA-exosome are not fully understood. Cofactors, such as the  
128 TRAMP poly(A)polymerase complex, stimulate the RNase activity of the RNA-exosome and specify its  
129 targets (Kilchert et al., 2016). Rrp6 has been found associated with chromosomes at actively  
130 transcribed genes (Andrulis et al., 2002), leading to the idea that the RNA-exosome can handle nuclear  
131 RNA in a co-transcriptional manner. By processing and eliminating cellular transcripts, the RNA-  
132 exosome plays a central role in proper gene expression (Kilchert et al., 2016).

133 To gain insights into how canonical condensins regulate genes, we investigated the role of condensin  
134 complexes in gene expression during the cell cycle, in fission and budding yeasts. In contrast with  
135 previous studies, we present here converging evidence that condensin plays no major direct role in  
136 the control of gene expression, neither in *S. pombe* nor in *S. cerevisiae*. We show that lack of condensin  
137 is associated with increased levels of mRNAs and non-coding RNAs in post-mitotic fission yeast cells,

138 reminiscent of other organisms, but that this effect is indirect: RNAs accumulate in condensin mutant  
139 cells because the missegregation of the rDNA during anaphase dampens RNA degradation by the  
140 nucleolar RNA-exosome in post-mitotic cells. The discovery that budding and fission yeast condensins  
141 contribute to proper gene expression by maintaining chromosome stability during cell divisions, and  
142 not through a direct impact on gene transcription, challenges the widespread idea that condensin I  
143 and condensin II are direct regulators of gene expression.

## 144 Results

### 145 RNA-exosome-sensitive transcripts accumulate when condensin is impaired in fission yeast

146 To assess the role of condensin in gene expression in fission yeast, we compared the transcriptomes  
147 of wild-type and mutant cells in which the SMC2<sup>Cut14</sup> ATPase subunit of condensin was inactivated by  
148 the thermosensitive *cut14-208* mutation (Saka et al., 1994). Cells growing asynchronously at  
149 permissive temperature were shifted to the restrictive temperature of 36°C for 2.5 hours (one cell  
150 doubling) to inactivate SMC2<sup>Cut14</sup> and their transcriptomes determined using strand-specific RNA-seq.  
151 We identified 306 transcripts that were differentially expressed by log2 fold changes superior to 0.5 or  
152 inferior to -0.5 (p value ≤ 0.05) in the *cut14-208* condensin mutant compared to wild type (Fig. 1A).  
153 The vast majority (98.5%; n=302/306) exhibited an increased steady-state level in the mutant. We  
154 confirmed the increase for six example RNAs by RT-qPCR, using either *act1* or *nda2* mRNA levels as  
155 internal controls (Fig. 1B and Fig. S1A). Thus, gene expression is altered, and mainly increased, in  
156 dividing condensin mutant *cut14-208* cells.

157 Of the 306 misregulated transcripts, 57% were mRNAs and the remaining 43% were non-protein coding  
158 RNAs (ncRNA) (Fig. 1C). We found histone mRNAs amongst the upregulated transcripts, confirming  
159 previous observations (Kim et al., 2013). However, the analysis of all increased mRNAs revealed no  
160 enrichment for a specific gene ontology (GO) term, which suggests that condensin does not regulate  
161 the expression a particular family of protein-coding genes. In contrast, ncRNAs, which represent 22%  
162 of the transcription units in the fission yeast genome (n = 1522/6948), were significantly enriched in  
163 the population of transcripts up-regulated in the *cut14-208* mutant (p<0.001, Chi-square test). Since  
164 most ncRNAs are maintained at a low level by the nuclear RNA-exosome (Wilhelm et al., 2008), their  
165 controlled degradation might be compromised in the mutant. We tested this hypothesis by Northern  
166 blotting using the antisense ncRNA *mug93-antisense-1* (*mug93as*) as a representative example. As  
167 shown in Figure 1D, *mug93as* was barely detectable in a wild-type background but accumulated in  
168 cells lacking Rrp6 or defective for Dis3, as expected if it were degraded by the RNA-exosome.  
169 Remarkably, *mug93as* also accumulated in *cut14-208* mutant cells, reaching levels reminiscent of the  
170 *rrp6Δ* control. Furthermore, chromatin immunoprecipitation (ChIP) against RNA Pol II revealed no  
171 change in RNA Pol II occupancy at neither the *mug93as* gene, nor two additional example ncRNA genes  
172 (*ncRNA.489* and *ncRNA.540*), in *cut14-208* cells (Fig. S1B), although their ncRNA levels were increased  
173 between 5 and 30-fold (Fig. 1B and S1A). These RNAs might therefore accumulate due to impaired  
174 degradation rather than increased transcription. Taken together, these results indicate that unstable  
175 RNA species accumulate when condensin is defective.

176 To clearly delineate the number of transcripts targeted by the RNA-exosome that accumulate in the  
177 *cut14-208* condensin mutant, we compared the transcriptomes of *cut14-208* and *rrp6Δ* cells that had  
178 been grown in parallel and processed simultaneously for strand-specific RNA-seq analyses. We  
179 identified 663 RNAs that were differentially expressed by log2 fold changes superior to 0.5 or inferior  
180 to -0.5 ( $p$  value  $\leq 0.05$ ) in the *rrp6Δ* mutant (Fig. 1E). Of these differentially expressed RNAs, 78% were  
181 increased in levels and 22% were decreased. The population of Rrp6-sensitive RNAs was considerably  
182 enriched in ncRNAs ( $p < 0.001$ , Chi-square test) (Fig. 1F). Pairwise comparison with *cut14-208* revealed  
183 that 41% of the RNAs that accumulated in the condensin mutant also accumulated in cells lacking Rrp6  
184 (Fig. 1G-H), with no clear preference for ncRNA and mRNA transcripts (50% each). A hypergeometric  
185 test confirmed that this overlap was statistically highly significant ( $p = 4.6e^{-55}$ ). These data indicate that  
186 a large fraction of the transcripts that accumulate when condensin is impaired are normally targeted  
187 by the ribonuclease Rrp6.

188

### 189 **Read-through transcripts accumulate upon condensin inactivation**

190 Visual inspection of the RNA-seq profile of the *cut14-208* mutant revealed a widespread increase of  
191 reads downstream of the 3' ends of genes, suggesting defects in the termination of transcription (for  
192 an example, see the *hsp9* gene in Fig. 2A). Read-through transcripts are abnormal RNAs that are  
193 extended at their 3' ends when RNA polymerases transcribe over Transcription Termination Sites (TTS)  
194 into downstream DNA sequences. Dis3 and Rrp6 have been reported to prevent the accumulation of  
195 read-through transcripts, although through possibly different mechanisms (Lemay et al., 2014; Zofall  
196 et al., 2009). Lemay et al. have shown that 3'-extended *hsp9* RNA accumulate in fission yeast cells when  
197 Dis3 is impaired, and to a lesser extent when Rrp6 is lacking (Lemay et al., 2014). By using RNase-H  
198 digestion of the 5' end of *hps9* mRNA and northern blotting, we confirmed the accumulation of 3'-  
199 extended *hsp9* RNA in *dis3* and *rrp6* mutant cells (Fig. 2B). Importantly, *cut14-208* mutant cells  
200 accumulated 3'-extended *hsp9* RNA of the same length as cells depleted of Dis3 or Rrp6. Moreover,  
201 other condensin mutants, such as *cut3-477* and *cut14-180*, also accumulated read-through *hsp9* RNA  
202 (Fig. S2A), which demonstrates that the accumulation of uncleaved, 3'-extended *hsp9* transcripts is a  
203 feature of condensin inactivation.

204 To determine the prevalence of read-through RNAs in *cut14-208* mutant cells, we systematically  
205 searched and quantified stretches of consecutive RNA-seq reads that mapped immediately  
206 downstream the TTS of annotated genes on the same DNA strand and did not overlap with  
207 downstream genes (see Material and Methods). Using these criteria, we identified 489 transcripts,  
208 mostly mRNAs and ncRNAs, which were extended at their 3' ends (Fig. 2C). Oligo(dT)-primed RT-PCR



209 showed that read-through RNAs were polyadenylated (Fig. 2D and S2B), suggesting that non-canonical  
210 polyadenylation sites were more frequently used in the *cut14-208* mutant than in wild-type cells, as  
211 already described for cells lacking Dis3 (Lemay et al., 2014). GO term analysis revealed no specific  
212 feature defining the population of read-through transcripts that accumulate in *cut14-208* cells.  
213 Furthermore, only 111 of the 489 read-through transcripts were also up-regulated (Fig. S2C), which  
214 suggests that the 3'-extended RNAs were not the by-product of increased transcription.

215 To further investigate the molecular origin of read-through RNAs in condensin mutant cells, we  
216 compared *cut14-208* with *rrp6Δ* cells. We detected 622 read-through RNAs, again mostly mRNAs and  
217 ncRNAs, in the transcriptome of cells lacking Rrp6 (Fig. 2E), which confirms previous reports (Lemay et  
218 al., 2014; Zofall et al., 2009). Importantly, 50% of these RNAs were also extended at their 3' ends in the  
219 *cut14-208* mutant (Fig. 2F). This reinforces the idea that the function of Rrp6 might be affected in a  
220 *cut14-208* background. Note that the steady state level of the Rrp6 protein remained unchanged in  
221 *cut14-208* mutant cells (Fig. S2D). Likewise, we observed no change in the mRNA levels of RNA-  
222 exosome or TRAMP components in the condensin mutant by RNA-seq (Table S1). Collectively, these  
223 data indicate that 3'-extended read-through transcripts accumulate upon condensin inactivation in  
224 fission yeast and that this accumulation might stem from defects in RNA processing of these transcripts  
225 by Rrp6.

226

## 227 **Condensin is dispensable for gene expression during interphase and metaphase in fission and** 228 **budding yeasts**

229 Since condensin is regulated over the course of the cell cycle, we sought to determine the phase(s)  
230 during which condensin function is required for proper gene expression. We synchronised *cut14-208*  
231 mutant cells in early S phase at the permissive temperature, raised the temperature to 36°C to  
232 inactivate condensin and at the same time released them into the cell cycle. We then measured gene  
233 expression by RT-qPCR as cells progressed from early S phase into the cell cycle (Fig. 3A). To ensure  
234 that cells went only through a single cell cycle at 36°C, we re-arrested cells in late G1 phase by the  
235 thermosensitive mutation *cdc10-129*. Previous work had shown that 10 min at 36°C are sufficient to  
236 inactivate condensin in *cut14-208* mutant cells (Nakazawa et al., 2011). FACScan analysis of DNA  
237 content and cytological observations revealed that *cdc10-129* single mutant and *cdc10-129 cut14-208*  
238 double mutant cells completed S phase (t = 30 min after release) and progressed through G2 phase (t  
239 = 60 min) and mitosis (t = 90 min) with similar kinetics (Fig. 3B). Chromosome segregation was impaired  
240 in the *cut14-208* mutant background, as revealed by the appearance of anaphase chromatin bridges  
241 (Fig. 3B, green line), which were subsequently severed by the septum upon mitotic exit, producing the

242 CUT phenotype (Cells Untimely Torn) (Fig. 3B, red line). Accordingly, FACScan analysis revealed the  
243 appearance of aberrant karyotypes in post-mitotic cells (t = 120 and 180 min; Fig. 3B).

244 Remarkably, we measured no up-regulation of any of the three reporter RNAs that we had selected  
245 from the pool of upregulated transcripts in *cut14-208* mutants (Fig. 1B) during G2 phase in  
246 synchronized *cdc10-129 cut14-208* cells (t = 60 min, Fig. 3C). These RNAs started to accumulate,  
247 however, at t = 90 min and further increased at t= 120 min and 180 min (Fig. 3C), coincidentally with the  
248 accumulation of aneuploid post-mitotic cells. This result suggests a possible requirement for condensin  
249 for proper gene expression during late mitosis or early G1 phase. To validate these results, we repeated  
250 the RT-qPCR measurements by synchronously releasing *cut14-208* cells from the early S phase block  
251 only 1 hour after shifting the temperature to 36°C and re-arrested them already at the G2/M transition  
252 using a *cdc25-22* mutation (Fig. 3D-E). In this time course experiment, we observed no up-regulation  
253 of the reporter RNAs at any time point (Fig. 3F). Similarly, RNA levels remained unchanged after a  
254 sustained arrest in metaphase at 36°C by depletion of the anaphase promoting complex (APC/C)  
255 activator Slp1 (Fig. 3G-I). We conclude that, in fission yeast, the function of condensin is dispensable  
256 for gene regulation during S and G2 phases of the cell cycle, consistent with the finding that condensin  
257 is largely displaced from the nucleus during this time (Sutani et al., 1999).

258 Condensin in the budding yeast *S. cerevisiae* is, in contrast, bound to chromosomes throughout the  
259 cell cycle (D'Ambrosio et al., 2008), much like the condensin II complex in metazoan cells. This raises  
260 the possibility that condensin controls interphase gene expression in this species. We first confirmed  
261 that condensin localizes to chromosomes of cells released synchronously into the cell cycle from a G1  
262 mating pheromone arrest (Fig. S3A). Chromosome spreading and CHIP showed that condensin bound  
263 to chromosomes already during G1 phase and that its levels on chromosomes increased as cells passed  
264 through S and G2 phases (Fig. S3B-C). To inactivate condensin in budding yeast, we proteolytically  
265 cleaved the kleisin (Brn1) subunit of the condensin ring by inducing expression of a site-specific  
266 protease from tobacco etch virus (TEV) using a galactose-inducible promoter, which efficiently  
267 released condensin from chromosomes (Cuylen et al., 2011), even during G1 phase (Fig. S3D). We then  
268 compared the transcriptome of G1 phase-arrested cells after condensin cleavage to cells with intact  
269 condensin (Fig. 4A). Remarkably, solely 26 transcripts were differentially expressed by at least two-fold  
270 (Fig. 4B). To rule out that this minor effect on gene expression was the result of the G1 phase arrest,  
271 we repeated the experiment, but this time released cells after Brn1 TEV cleavage from the G1 phase  
272 arrest and re-arrested them in the subsequent M phase by addition of the spindle poison nocodazole  
273 before preparing RNA for transcriptome analysis (Fig. 4C). In this experiment, only six genes showed  
274 an up- or downregulation of two-fold or more (Fig. 4D). We conclude that condensin inactivation by

275 releasing the complex from chromosomes has no major effects on the gene expression program of  
276 budding yeast cells.

277

278 **Gene expression changes in fission yeast condensin mutants are the result of a loss of genome**  
279 **integrity**

280 The fact that we observed changes in transcription levels in asynchronously dividing *cut14-208* fission  
281 yeast mutant cells, but not in fission or budding yeast condensin mutants that are prevented from  
282 undergoing anaphase, raises the possibility that defects in chromosome segregation caused by  
283 condensin inactivation might be causally responsible for condensin-dependent gene deregulation.  
284 Indeed, when we arrested fission yeast *cut14-208* cells at the G2/M transition using the analogue-  
285 sensitive Cdc2asM17 kinase (Aoi et al., 2014), shifted the temperature to 36°C and then released them  
286 from the arrest to complete mitosis, we measured an increase in transcript levels after mitotic exit and  
287 the severing of chromosomes (Fig. S4).

288 If RNA misregulation were indeed caused by the severing of missegregated chromosomes by the  
289 cytokinetic ring, then three key hypotheses should prove correct: (1) any mutation that results in  
290 chromosome missegregation and cutting upon mitotic exit should result in an increase in levels of the  
291 same or a similar set of RNAs as the *cut14-208* mutation, (2) the amplitude of the increase in RNA levels  
292 should correlate with the prevalence of missegregation, and (3) preventing chromosome cutting in  
293 *cut14-208* cells should attenuate the changes in RNA levels. As shown in Fig. 5A, mutation of separase  
294 (*ptr4-1*) or of a subunit of the APC/C (*cut9-665*) results in chromosome missegregation and severing by  
295 the cytokinetic ring upon mitotic exit and an increase in RNA levels in a manner similar to *cut14-208*.  
296 Moreover, the amplitude of the increase in RNA levels correlated with the frequency of chromosome  
297 cutting in the different mutants (Fig. 5A). The analysis of five additional condensin mutations of  
298 increasing prevalence further confirmed this correlation (Fig. S5A-B). Furthermore, we found that RNA  
299 levels remained comparable to wild-type in *cut14-208* cells that were prevented from undergoing  
300 cytokinesis. The thermosensitive *cdc15-140* mutation prevents cytokinesis at the restrictive  
301 temperature (Balasubramanian et al., 1998). Double mutant cells *cdc15-140 cut14-208* exhibited  
302 chromatin bridges during anaphase at 36°C (Fig. 5B), indicating that *cdc15-140* did not suppress the  
303 chromosome segregation defect caused by the *cut14-208* mutation. However, in the absence of a  
304 cytokinetic ring, these chromatin bridges were no longer severed upon mitotic exit, which suppressed  
305 the production of karyotypically-aberrant post-mitotic cells (Fig. 5B). Remarkably, parallel RNA-seq  
306 analysis revealed that ~98% of the RNA up-regulated in the *cut14-208* single mutant were no-longer  
307 detected as differentially expressed in the double mutant *cut14-208 cdc15-140* (Fig. 5C-D). The

308 suppressive effect of *cdc15-140* on *cut14-208* with respect to the accumulation of the anti-sense RNA  
309 *mug93as* is shown as an example in Fig. 5E. The production of read-through transcripts was similarly  
310 suppressed (Fig. S5C-D). Note that RNA levels remained increased in the *cdc15-140 rrp6Δ* mutant (Fig.  
311 S5E), ruling out a potential compensatory effect of *cdc15-140* on Rrp6 deficiency per se. Finally, we  
312 found that *cdc12-112*, another mutation that also impairs cytokinesis (Chang et al., 1997), equally  
313 restored normal gene expression in a *cut14-208* genetic background (Fig. S5F), confirming that  
314 cytokinesis was a driving force for the gene deregulation exhibited by the *cut14-208* mutant. Taken  
315 together, these data indicate that changes in gene expression exhibited by *cut14-208* condensin  
316 mutant cells are mostly, if not entirely, the consequence of cytokinesis when condensin is inactivated.

317 The severing of chromosomes by the cytokinetic ring leads to DNA damage, as revealed by the  
318 accumulation of sustained Rad22-GFP foci (Fig. S6A), but also to the formation of genomically-aberrant  
319 daughter cells, as shown by FACScan analysis of DNA contents (Fig. 3B). Both phenotypes coincide with  
320 the increase in RNA levels, and both are suppressed by *cdc15-140* (Fig. 5B and S6A). To test whether  
321 one or both might be responsible for gene deregulation in *cut14-208* cells, we analysed by RT-qPCR  
322 the impact of DNA damage upon mitotic exit, or of genomic imbalance, on gene expression in cells  
323 provided with a fully functional condensin. To damage DNA, cells were synchronized in prometaphase  
324 by using the cryosensitive mutation *nda3-KM311*, and released into mitosis in the presence of  
325 Camptothecin to induce DNA breaks during S phase, which in fission yeast overlaps with cytokinesis  
326 and septum formation. As an alternative experiment, wild-type cycling cells were treated with Zeocin.  
327 The appearance of sustained Rad22-GFP foci in cells treated with Camptothecin or with Zeocin  
328 confirmed the accumulation of DNA damage (Fig. S6B). However, RT-qPCR revealed no increase in RNA  
329 levels (Fig. S6B), arguing that DNA damage is not the main driver for gene deregulation in *cut14-208*  
330 mutant cells.

331 To test the impact of genomic imbalance on gene expression, we used the thermosensitive *mis6-302*  
332 mutation which disrupts kinetochore assembly, and hence accurate chromosome segregation during  
333 anaphase, leading to the production of aneuploid post-mitotic cells (Saitoh et al., 1997). Note that  
334 *mis6-302* causes neither chromatin bridges nor a CUT phenotype. FACScan analysis of *mis6-302* cells  
335 grown at the restrictive temperature confirmed the appearance of genomically-aberrant cells (Fig. 6A).  
336 Remarkably, RT-qPCR of four reporter RNAs revealed a similar increase in *mis6-302* cells as in *cut14-*  
337 *208* mutant cells (Fig. 6B). Therefore, this result strongly suggests that the imbalance in genomic  
338 content that results from chromosome missegregation during mitosis is a major cause of gene  
339 deregulation when condensin function is impaired.

340

341 **Non-disjunction of the rDNA during anaphase depletes the RNA-exosome from post-mitotic fission**  
342 **yeast cells and results in ncRNA accumulation**

343 To investigate further the mechanism of gene deregulation when condensin is impaired, we looked in  
344 more details at chromosome segregation during anaphase in *cut14-208* mutant cells. It has been  
345 reported that condensin plays a major role in the segregation of the rDNA in late anaphase in budding  
346 yeast (D'Ambrosio et al., 2008; Freeman et al., 2000). We reached the same conclusion in fission yeast.  
347 When we scored the segregation of a GFP-labelled version of the rDNA-binding protein Gar2 in *cut14-*  
348 *208* mutant cells, we found that sister rDNA copies failed to separate during anaphase, frequently  
349 resulting in the formation of anucleolate daughter cells (Fig. 6C). The *ptr4-1* and *mis6-302* mutants also  
350 exhibited a high rate of anucleolate cell formation (Fig. 6C) and the *cdc15-140* mutation suppressed the  
351 formation of anucleolate cells in *cut14-208* mutants (Fig. S6C). Thus, the inability to properly segregate  
352 the rDNA during anaphase correlates with the accumulation of mRNAs and ncRNAs targeted by the  
353 RNA-exosome.

354 Live imaging of Rrp6 and Dis3 has revealed that the two RNases are enriched in the nucleolus of fission  
355 yeast cells (Yamanaka et al., 2010). Given the overlap between the differential transcriptomes of *cut14-*  
356 *208* and *rrp6Δ* mutants, we hypothesised that rDNA non-disjunction might alter the localisation of  
357 Rrp6 in daughter cells upon mitotic exit. Co-immunostaining of Rrp6 tagged with a myc epitope and  
358 Gar2 tagged with GFP confirmed the nuclear localisation of Rrp6 and its marked enrichment within the  
359 nucleolus (Fig. 6D). In a wild-type background, Rrp6 appeared evenly distributed between nuclei in  
360 post-mitotic daughter cells (median signal ratio ~1). In sharp contrast, the amount of Rrp6 was  
361 markedly reduced in *cut14-208* anucleolate daughter cells compared to their nucleolate counterparts  
362 (median signal ratio ~0.25; Fig. 6D). We observed a similar asymmetrical distribution of Dis3 tagged  
363 with an HA epitope in post-mitotic *cut14-208* cells (Fig. S6D). Thus, condensin deficiency leads to rDNA  
364 non-disjunction during anaphase and the production of anucleolate post-mitotic cells, which are  
365 depleted of Rrp6 and Dis3.

366 The depletion of Rrp6 and Dis3 provided a plausible cause for the accumulation of exosome-sensitive  
367 RNA in asynchronously dividing *cut14-208* condensin mutant cells. If it were the case, exosome-  
368 sensitive RNAs should accumulate preferentially in anucleolate *cut14-208* cells. Single molecule RNA-  
369 FISH showed that the ncRNA *mug93as* produced very faint signals in wild-type cells (Fig. 6E), consistent  
370 with its active degradation by the RNA-exosome (Fig. 1D). On the contrary, *mug93as* levels were  
371 considerably higher in *cut14-208* mutant cells, which confirms our previous RNA-seq and RT-qPCR data  
372 (Fig. 6E). Crucially, *mug93as* RNA accumulated mainly in anucleolate cells devoid of Gar2-GFP, whereas  
373 a control mRNA (*cct2*) was evenly distributed in *cut14-208* mutant cells (Fig. 6F). We conclude that

374 condensin loss-of-function in fission yeast leads to the formation of anucleolate cells that accumulate  
375 RNA-exosome-sensitive transcripts.

## 376 Discussion

377 Condensin I and II have been implicated in the control of gene expression in a wide range of organisms,  
378 but it has remained unclear what aspect of the gene expression program they affect. Here, we  
379 challenge the idea that condensin complexes directly regulate transcription by providing compelling  
380 evidence that the functional integrity of condensin is dispensable for the maintenance of proper gene  
381 expression during interphase and even mitosis in fission and budding yeasts. Consistent with previous  
382 studies, we show that condensin deficiency alters the transcriptome of post-mitotic cells in fission  
383 yeast. However, we further show that this effect is mostly, if not entirely, the indirect consequence of  
384 chromosome missegregation during anaphase, which notably depletes the RNA-exosome from  
385 daughter cells. Our findings therefore indicate that condensin plays no direct role in the control of gene  
386 expression in fission and budding yeasts, but is essential for the maintenance of proper gene  
387 expression by contributing to the accurate segregation of chromosomes during mitosis.

388 Strand-specific RNA seq analysis revealed that *cut14-208* condensin mutant cells accumulate mRNA,  
389 ncRNA and 3'-extended read-through transcripts. Additional condensin mutants such as *cut3-477*,  
390 *cut3-m26*, *cut14-90* and *cut14-180* exhibited similar increases in RNA levels, arguing that condensin  
391 takes part in proper gene expression in fission yeast, alike in other organisms. The population of *cut14-*  
392 *208* condensin-mutant cells that exhibited increased RNA levels went through G2, M, G1, and S phases  
393 at the restrictive temperature in an asynchronous manner before their RNA was extracted and  
394 analysed. However, when *cut14-208* cells were synchronised during the S or G2 phases or even during  
395 metaphase, RNA levels remained unchanged. Moreover, the prevalent suppressive effect of *cdc15-140*  
396 upon *cut14-208* in term of changes in gene expression, argues (1) that condensin impinges on gene  
397 expression in a cytokinesis-dependent manner, and therefore in an indirect manner, and (2) that  
398 condensin deficiency has in itself no predominant impact on the steady state level of RNAs in post-  
399 mitotic cells. Thus, although we cannot rule out the possibility that subtle impacts of condensin on the  
400 dynamics of transcription might have escaped our detection, our data strongly indicate that condensin  
401 plays no major direct role in the maintenance of proper gene expression during interphase and even  
402 mitosis in fission yeast. Concordantly, we show that in budding yeast too, condensin is largely  
403 dispensable for the maintenance of gene expression during the G1 phase or during metaphase.  
404 Importantly, our results are in perfect agreement with recent data supporting the idea that the global  
405 transcriptional program of *S. cerevisiae* is largely insensitive to condensin depletion (Paul et al., 2017).  
406 Note that the separation of the budding and fission yeast lineages is thought to have occurred ~ 420  
407 million years ago, which makes them as different from each other as either is from animals (Sipiczki,  
408 2000). Thus, our results provide compelling evidence that, in two evolutionarily distant organisms,

409 condensin complexes play no major direct role in the maintenance of an established gene expression  
410 program.

411 The corollary is that the increased RNA levels exhibited by fission yeast *cut14-208* mutant cells must  
412 be the indirect consequence of a failure during late mitosis caused by a lack of condensin activity. This  
413 conclusion is in agreement with our observation that RNA levels increase coincidentally with mitotic exit  
414 in synchronized condensin-mutant cells. In line with this, we provide evidence that the non-disjunction  
415 of the duplicated copies of the rDNA during anaphase constitutes a major source of gene deregulation  
416 in condensin mutant cells. (1) We show that sister-rDNA almost systematically fail to disjoin during  
417 anaphase in *cut14-208* cells, leading to the production of anucleolate daughter cells. (2) Rrp6 and Dis3  
418 are enriched in the nucleolus in wild-type cells, but largely depleted from anucleolate *cut14-208* cells.  
419 Rrp6 accumulates predominantly on chromosomes during mitosis in *Drosophila* (Graham et al., 2009),  
420 suggesting that the bulk of Rrp6 and Dis3 might similarly co-segregate with the nucleolus during  
421 anaphase in fission yeast. (3) We show by RNA-seq, RT-qPCR and Northern blotting that the depletion  
422 of Rrp6 and Dis3 from anucleolate condensin mutant cells coincides with an increased steady state  
423 level of RNA-exosome-sensitive transcripts. Note that the slight additive effect exhibited by the *cut14-*  
424 *208* and *rrp6Δ* mutations with respect to the accumulation of *mug93as* (Fig. 1E) and of 3'-extended  
425 *hsp9* RNA (Fig. 2B) is consistent with the co-depletion of Rrp6 and Dis3 from anucleolate *cut14-208*  
426 mutant cells. (4) We further show by RNA-FISH that an RNA-exosome sensitive transcript, the antisense  
427 RNA *mug93as*, accumulates principally if not exclusively in anucleolate condensin mutant cells, as  
428 expected from an impaired degradation. (5) Importantly, suppressing the production of anucleolate  
429 daughter cells by the cytokinesis mutation *cdc15-140*, in a *cut14-208* mutant background, is sufficient  
430 to restore an almost normal transcriptome, despite condensin remaining impaired. Mitosis being  
431 closed in fission yeast, when cytokinesis is prevented, anaphase chromatin bridges and the nucleolus  
432 collapse into a single nucleus upon mitotic exit. (6) Finally, we show that, reciprocally, generating  
433 anucleolate and aneuploid daughter cells by disrupting chromosome segregation by the kinetochore  
434 mutation *mis6-302*, is sufficient to trigger the accumulation of RNA-exosome-sensitive transcripts,  
435 alike *cut14-208*, but without mutating condensin.

436 Based on these observations, we propose the model depicted in Figure 7. Condensin deficiency impairs  
437 chromosome segregation and notably leads to chromatin bridges and the non-disjunction of the rDNA  
438 during anaphase. Rrp6 and Dis3, which are enriched in the nucleolus, and which most likely segregate  
439 with the bulk of the rDNA during anaphase, become depleted from anucleolate daughter cells  
440 produced upon mitotic exit. This strongly reduces the activity of the RNA-exosome in anucleolate  
441 daughter cells, allowing the accumulation of RNA molecules that are normally actively degraded by the



442 RNA-exosome, such as ncRNAs and 3'-extended RNAs. This sequence of events illustrate how  
443 condensin deficiency indirectly changes gene expression in fission yeast.

444 That the bulk of the nucleolar RNA-exosome might co-segregate with the rDNA during mitosis has  
445 some consequences in the fields of gene silencing and RNA export. Condensin has been implicated in  
446 gene silencing at pericentric heterochromatin in fission yeast (He et al., 2016). However, since Rrp6 is  
447 known to take part in the turnover of heterochromatic transcripts (Buhler et al., 2007), it will be  
448 important to assess to which extent chromosome missegregation during anaphase might account for  
449 the alleviation of silencing observed in condensin-mutant cells. Likewise, genetic screens for factors  
450 involved in the nuclear export of polyadenylated mRNAs have led to the isolation of various unrelated  
451 mutations that all generate anucleolate cells, including mutations in condensin in budding yeast (Ideue  
452 et al., 2004; Paul and Montpetit, 2016). This has raised the idea that the nucleolus takes part in the  
453 nuclear export of mRNAs. However, since we observed no nuclear retention of *cct2* mRNA in  
454 anucleolate condensin-mutant cells, and since non-coding RNA are heavily polyadenylated in fission  
455 yeast (Zhou et al., 2015), we propose that the accumulation of polyadenylated transcripts in  
456 anucleolate cells might reflect an impaired processing of non-coding RNAs by the RNA-exosome rather  
457 than a defective export. The finding that Dis3 or Rrp6 loss-of-function increases the concentration of  
458 polyadenylated transcripts in the nucleolus of budding yeast cells is in good agreement with this  
459 conclusion (Paul and Montpetit, 2016).

460 Additional mechanisms linked to chromosome instability and the genesis of aberrant karyotypes in  
461 post-mitotic cells most likely contribute to modify the transcriptome when condensin I or II is defective.  
462 The slight up-regulation of histone genes that we observed in *cut14-208* mutant cells has previously  
463 been attributed to an indirect stabilization of the transcription factor Ams2 during defective anaphase  
464 (Kim et al., 2016). More broadly, aneuploidy itself is known to change the transcriptome, with a  
465 recurrent increased expression of genes involved in the response to stress and a down-regulation of  
466 cell-cycle and proliferation genes (Sheltzer et al., 2012). Premalignant murine T-cells defective for  
467 condensin II exhibit a transcriptome evocative of a stress response to aneuploidy (Woodward et al.,  
468 2016). Similarly, the depletion of Smc2, and hence the reduction of both condensin I and II, in a human  
469 neuroblastoma cell line modifies the expression of a large number of genes implicated mainly in cell  
470 cycle progression or DNA damage response (Murakami-Tonami et al., 2014). However, we did not  
471 observed such a clear transcriptomic signature in *cut14-208* mutant cells, suggesting either that  
472 aneuploidy per se, i.e. the gain or loss of entire chromosomes, is not a prevalent condition when  
473 condensin is impaired in fission yeast, or that condensin-mediated aneuploidy is strongly counter-  
474 selected in asynchronous cultures, perhaps because most aneuploid cells are unviable or extremely  
475 unstable in fission yeast (Niwa and Yanagida, 1985).

476 Our finding that sister-rDNA almost systematically non-disjoin during anaphase in fission yeast  
477 condensin mutant cells is reminiscent of the severe missegregation of the rDNA observed in budding  
478 yeast and human cells deprived of functional condensin complexes (D'Ambrosio et al., 2008; Freeman  
479 et al., 2000; Samoshkin et al., 2012), and is consistent with the idea that decatenation of sister-rDNA  
480 during late anaphase relies upon condensin (D'Ambrosio et al., 2008). What remains puzzling,  
481 however, is the fact that chromatin bridges are almost systematically severed by the cytokinetic ring  
482 in *cut14-208* mutant cells, while the severing of the nucleolus is extremely infrequent (<10% of the  
483 cases). The persistence of the nucleolus in the axis of cleavage might mechanically hinder cytokinesis,  
484 or trigger a wait signal. Alternatively, condensin deficiency might cause DNA double-strand breaks at  
485 fragile sites located on the centromere-proximal border of the cluster of rDNA repeats, allowing the  
486 displacement of untangled sister-rDNA towards one pole of the mitotic spindle through a spring-  
487 relaxation effect. A focused role for condensin in organising a region proximal to the rDNA, and located  
488 on its centromeric side, has been reported in budding yeast (Schalbetter et al., 2017). In HeLa cells, the  
489 depletion of SMC2 induces DNA breaks predominantly in repetitive DNA, including the rDNA/Nucleolar  
490 Organising Regions (Samoshkin et al., 2012). Thus missegregation of the rDNA in fission yeast cells  
491 when condensin is impaired might reveal an evolutionarily-conserved acute dependency of repeated  
492 DNA elements upon condensin for their segregation and integrity. Given the prevalence of tandem  
493 repetitive DNA arrays in mammalian genomes (Warburton et al., 2008), it is tempting to speculate that  
494 condensin loss of function might have similar confounding impacts on the preservation of their  
495 structural integrity and proper expression.

496 Studies performed over the last 20 years have shown that the tri-dimensional organization of the  
497 genome influences gene expression, raising the key question of the role played by SMC complexes in  
498 the control of gene expression. A large number of studies have concluded in favour of a role for cohesin  
499 and condensin I and II in the control of gene expression (Downen and Young, 2014; Merkschlager and  
500 Nora, 2016), raising the idea that cohesin and condensins might collectively link gene expression to  
501 genome architecture. Although there are robust examples of cohesin-mediated regulation of cell-type-  
502 specific gene expression (Merkschlager and Nora, 2016), for instance through enhancer-to-  
503 promoter interactions (Ing-Simmons et al., 2015; Kagey et al., 2010), a recent study has raised the idea  
504 that the involvement of cohesin in the maintenance of an established gene expression program might  
505 be less prominent than initially thought (Rao et al., 2017). Similarly, despite ample reports of cells  
506 defective for condensin I or II exhibiting changes in gene expression (Bhalla et al., 2002; Downen et al.,  
507 2013; He et al., 2016; Iwasaki et al., 2010; Kranz et al., 2013; Li et al., 2015; Longworth et al., 2012;  
508 Lupo et al., 2001; Murakami-Tonami et al., 2014; Rawlings et al., 2011; Wang et al., 2016; Yuen et al.,  
509 2017), to the best of our knowledge, there has been thus far no clear case where the influence of

510 condensin I or II on gene expression has been dissociated from a possible confounding effect of  
511 chromosome missegregation. By providing evidence that condensin plays no major direct role in the  
512 control of gene expression in fission and budding yeasts, and showing that condensin impinges on gene  
513 expression by preserving the stability of the genome during mitosis, our work challenges the concept  
514 of gene regulation as a collective property of SMC complexes, and should help better define future  
515 studies on the role of canonical condensins in gene expression in other organisms.

## 516 **Materials and Methods**

### 517 **Media, molecular genetics and strains**

518 Media and molecular genetics methods were as previously described (Moreno et al., 1991). Fission  
519 yeast cells were grown at 28°C in complete YES+A medium or in synthetic PMG medium. The *nmt1-*  
520 *dis3* chimerical gene was repressed by the addition of thiamine 60 µM final to the growth medium, as  
521 described (Lemay et al., 2014), followed by further cell culture for 12–15h. Strains used in this study  
522 are listed in Table S2.

### 523 **Cell cycle synchronization**

524 Fission yeast cells were synchronized in early S phase at 28°C by the adjunction of hydroxyurea (HU)  
525 15 mM final. G2/M arrest was achieved using the thermo-sensitive *cdc25-22* mutation or the analogue-  
526 sensitive *cdc2asM17* allele (Aoi et al., 2014), and G1 arrest using the thermo-sensitive *cdc10-129*  
527 mutation. Reversible prometaphase arrest was performed at 19°C using the cold-sensitive *nda3-*  
528 *KM311* mutation (Hiraoka et al., 1984). Metaphase arrest was achieved in PMG medium supplemented  
529 with thiamine 20 µM using the thiamine repressible *nmt41-slp1* gene (Petrova et al., 2013). Mitotic  
530 indexes were measured as the percentages of mitotic cells accumulating Cnd2-GFP in the nucleus  
531 (Sutani et al., 1999). Budding yeast cells were grown at 30°C in YEPD to mid-log phase, collected by  
532 filtration, washed with dH<sub>2</sub>O, and re-suspended at an OD<sub>600</sub> of 0.30.4 in YEPD containing 3 µg/ml α-  
533 factor. After one hour, additional α-factor was added to 3 µg/ml. After another hour, an aliquot of cells  
534 was used for ChIP (G1 sample) and the remaining cells were collected by filtration, washed with dH<sub>2</sub>O  
535 and re-suspended in YEPD to release the cells from the G1 arrest. 30 min after and 60 min after the  
536 release, aliquots were collected for ChIP (S phase sample and G2 sample respectively). Budding yeast  
537 strains expressing TEV protease under the *GAL1* promoter were grown at 30°C in YEP medium  
538 containing 2% raffinose (YEP-R) to mid-log phase, collected by filtration, washed with dH<sub>2</sub>O, and re-  
539 suspended at an OD<sub>600</sub> of 0.15 in YEP-R containing 3 µg/ml α-factor. After one hour, additional α-  
540 factor was added to 3 µg/ml. After 30 min, the cultures were split and TEV protease expression was  
541 induced in one half by addition of 2% galactose. After another 30 min, cells were collected by filtration,  
542 washed with dH<sub>2</sub>O and re-suspended in YEP-R (uninduced) or YEP-R with 2% galactose (YEP-RG;  
543 induced) with 3 µg/ml α-factor. Fresh α-factor was added to 3 µg/ml after another hour to all cultures  
544 and ChIP samples were collected one hour later.

### 545 **Microscopy**

546 To quantify anucleolate cells, cells expressing Gar2-mCherry and Psy1-GFP fusion proteins were fixed  
547 with cold methanol and DNA was stained with 4', 6-diamidino-2-phenylindole (DAPI) at 0,5 µg/ml in  
548 PEM buffer (100 mM PIPES, 1 mM EGTA, 1mM MgSO<sub>4</sub>, pH 6,9). Gar2-mCherry and Psy1-GFP were

549 directly observed under the fluorescent microscope. Rad22-GFP foci were analysed on cells fixed with  
550 iced-cold methanol and stained with DAPI. Cytological analysis of the CUT phenotype was performed  
551 as described (Hagan, 2016) except that cells were fixed with cold methanol and stained with Hoechst  
552 33342 (20 µg/ml). Immunofluorescence was performed as described (Robellet et al., 2014), with the  
553 following modifications. Cells shifted at 36°C for 2h30 min were fixed with ice-cold ethanol and stored  
554 at 4°C.  $2 \times 10^7$  cells were washed in PEMS (PEM +1.2 M Sorbitol) and digested with Zymolyase 100T (0.4  
555 mg/ml in PEMS) for 30 min at 37°C. Images were processed and quantified using ImageJ with  
556 automated background subtraction.

#### 557 **FACScan**

558  $2 \times 10^6$  fission yeast cells were fixed with ethanol 70% (v/v), washed in sodium citrate (50 mM pH 7) and  
559 digested with RNase A (100 µg/ml) (Merck). Cells were briefly sonicated and stained with 1 µM Sytox  
560 Green (ThermoFischer Scientific). DNA content was quantified on a FACSCALIBUR cytometer using  
561 CellQuest Pro software (BD Biosciences). Raw data were analyzed with FlowJo software (BD  
562 biosciences). FACScan analysis of budding yeast cells was performed as previously described after  
563 staining DNA with either propidium iodide (Fig. 4; Cuylen et al., 2011) or SYBR green I (Fig. S3; Cuylen  
564 et al., 2013).

#### 565 **Chromatin immunoprecipitation and quantitative PCR**

566 ChIPs for fission yeast cells were performed as described (Vanoosthuyse et al., 2014).  $2 \times 10^8$  cells were  
567 fixed with 1% formaldehyde at 36°C for 5 min and then 19°C for 25 min, washed with PBS and lysed  
568 using acid-washed glass beads in a Precellys homogenizer. Chromatin was sheared into 300- to 900-bp  
569 fragments by sonication using a Diagenode bioruptor. Sheared chromatin was split in two equivalent  
570 fractions subjected to parallel immunoprecipitations using magnetic Dynabeads coated with the  
571 appropriate antibody. Total and immunoprecipitated DNA was purified using the NucleoSpin PCR  
572 clean-up kit (Macherey-Nagel). DNA was analysed on a Rotor-Gene PCR cycler using QuantiFast SYBR  
573 Green mix. ChIP-qPCR experiments for budding yeast cells were performed as described previously  
574 (Cuylen et al., 2011). In brief, aliquots of 42 ml culture with an  $OD_{600}$  of 0.6 were fixed in 3%  
575 formaldehyde at 16°C. Chromatin was sonicated to an average length of 500 bp using a Diagenode  
576 bioruptor. For anti-HA immunoprecipitation, 50 µl protein G dynabeads and 1.5 µl 16B12 antibody  
577 (anti-HA.11, Covance) were used. For anti-PK immunoprecipitation, 50 µl protein A dynabeads and 2  
578 µl anti-PK (V5) tag antibody (Abd Serotec MCA1360) were used. Purified DNA was analysed with an  
579 ABI 7500 real-time PCR system (Applied Biosystems) using rDNA-specific primers. Primers are listed in  
580 Table S3.

#### 581 **Chromosome spreads**

582 Budding yeast cells were grown at 30°C in YEPD to mid-log phase, collected by filtration, washed with  
583 dH<sub>2</sub>O, and re-suspended at an OD<sub>600</sub> of 0.2 in YEPD containing 3 µg/ml α-factor. After one hour,  
584 additional α-factor was added to 3 µg/ml. After another hour, an aliquot of cells was used for  
585 chromosome spreading (G1 sample) and the remaining cells were collected by filtration, washed with  
586 dH<sub>2</sub>O and re-suspended into YEPD to release the cells from the G1 arrest. Aliquots were collected for  
587 chromosome spreading 30 min and 60 min after the release (S and G2 phase samples, respectively).  
588 Chromosome spreads were prepared as described previously (Cuylen et al., 2011) and stained for Brn1-  
589 HA<sub>6</sub> with 16B12 (anti-HA.11, Covance, 1:500) and Alexa Fluor 594-labelled anti-mouse IgG (Invitrogen,  
590 1:600) antibodies and for DNA with DAPI. Images were recorded on a DeltaVision Spectris Restoration  
591 microscope (Applied Precision) with a 100×, NA 1.35 oil immersion objective.

### 592 **Total RNA extraction and RT-qPCR**

593 Total RNA was extracted from 2x10<sup>8</sup> fission yeast cells by standard hot-phenol method. 1 µg of total  
594 RNA was reverse-transcribed using Superscript III (Life Technologies) following the manufacturer's  
595 instructions, using random hexamers in the presence or absence of Reverse Transcriptase (RT). cDNAs  
596 were quantified by real time qPCR on a Rotor-Gene PCR cycler using QuantiFast SYBR Green mix. The  
597 absence of PCR product in minus RT samples has been verified for all RT-qPCR shown in this  
598 publication. Primers are listed in Table S3.

### 599 **RNase digestion and Northern blot**

600 For RNase H digestion, total RNA was hybridized with a DNA oligonucleotide complementary to a  
601 sequence located at the 5' end of the *hsp9* mRNA and digested with RNase H (Roche) following the  
602 manufacturer's instructions. For Northern blotting, total or RNase H-digested RNA was resolved on 1%  
603 agarose gel supplemented with formaldehyde 0.7% (v/v), transferred onto Hybond-XL nylon  
604 membranes (Amersham) and cross-linked. Pre-hybridization and overnight hybridization were carried  
605 out in ULTRAhyb buffer (Ambion) at 68°C. Strand-specific RNA probes were generated by in vitro  
606 transcription using the T7 riboprobe system (Ambion) and internally labelled with [α-32P]-UTP.  
607 Membranes were quickly washed with 2X SSC and 0,1% SDS, 10 min in 2X SSC and 0,1% SDS, and 3  
608 times in 0,2X SSC and 0,1% SDS. Blots were imaged with Typhoon 8600 instrument (Molecular  
609 Dynamics) and quantified with ImageQuant TL (GE Healthcare).

### 610 **Single molecule RNA Fluorescence In Situ Hybridization (smFISH), imaging and quantification**

611 smFISH was performed on formaldehyde-fixed cells, as described (Keifenheim et al., 2017). Probes  
612 were designed and synthesized by Biosearch Technologies (Petaluma, CA). The *mug93as* and *cct2*  
613 probes were labelled with Quasar 670. Probe sequences are listed in Table S3. Cells were imaged on a  
614 Leica TCS Sp8, using a 63x/1.40 oil objective, Optical z sections were acquired (z-step size 0.3 microns)

615 for each scan to cover the depth of the cells. For image analysis and quantification, cell boundaries  
616 were outlined manually and RNA spots quantified using FISH-quant package implemented in MATLAB,  
617 as described (Mueller et al., 2013). The FISH-quant detection technical error was estimated at 6-7% by  
618 quantifying mRNA numbers using two sets of probes covering the 5' half or the 3' half of the *rpb1*  
619 mRNA and labelled with different dyes.

## 620 **RNA-seq and analysis**

621 RNA-seq was performed on biological triplicates. Total RNA was extracted from  $2 \times 10^8$  yeast cells by  
622 standard hot-phenol method. RNA quality was determined using TapeStation (Agilent) with RINe score  
623 >9. Ribosomal RNA was removed by treating 2  $\mu$ g of total RNA with the Ribo-Zero Gold rRNA Removal  
624 Kit (Yeast) (MRZY1324, Illumina, Paris, France). RNA-seq libraries were prepared using TruSeq Stranded  
625 kit. Sequencing was performed on Illumina Hiseq 4000, with single-end reads of 50 nt in length. Total  
626 number of reads per sample ranged from 59 million to 93 million. For in-silico analyses, we used the  
627 version 2.30 of the *S. pombe* genome in fasta format and the corresponding gff3 annotations  
628 downloaded from the ebi website (2017/03/22). Scripts are available in the following git repository:  
629 <https://github.com/LBMC/readthroughpombe>. The RNA-seq reads were processed with cutadapt to  
630 remove adaptors and further trimmed with UrQt (--t 20) based on their quality. After quality control  
631 with fastqc, we built the reverse complement of the reads in the fastq files using seqkit, indexed the  
632 genome (-build) and mapped the trimmed fastq files (--very-sensitive) using Bowtie2. Mapping output  
633 files were saved in bam format with samtools (view -Sb).

634 To detect read-through events, we searched for sections of reads located immediately downstream of  
635 the 3' ends of annotated transcription units, on the same DNA strand, and within gene-free intergenic  
636 regions. First, broad peaks of RNA-seq reads were identified using the peak caller Music (v6613c53).  
637 Bam files were sorted and filtered as forward or reverse with samtools (view -hb -F 0x10 or view -hb -  
638 f 0x10). The gff annotation file was converted to bed with convert2bed from bedtools, the genome  
639 indexed with samtools (faidx) and the annotation file split into forward and reverse with bedtools  
640 (complement). Next, reads corresponding to annotated transcripts were removed using samtools view  
641 (-hb bams -L annotation). Subtracted bam files were sorted with samtools sort, and RNA-seq peaks  
642 located outside annotated transcripts were detected with Music (-get\_per\_win\_p\_vals\_vs\_FC -  
643 begin\_l 50 -end\_l 500 -step 1.1 -l\_mapp 50 -l\_frag 363 -q\_val 1 -l\_p 0). The resulting annotation was  
644 further filtered by removing peaks whose starting positions were located more than 2 read-length  
645 away from the nearest 3' ends. Only peaks detected in at least 2 out of 3 biological replicates were  
646 considered. Read-through detection was performed independently for the *rrp6* $\Delta$  and *cut14-208*  
647 mutants. To achieve comparable examination between *rrp6* $\Delta$  and *cut14-208* for reads quantification,  
648 we merged their respective read-through annotations and sorted them with bedtools (sort) and

649 extracted the forward and reverse reads from the bam files with bedtools (bamtofastq). We generated  
650 the list of transcript sequences from the genome and the annotation with bedtools (getfasta -s). The  
651 transcript sequences were then indexed with kallisto (index-k 31 --make-unique) and the  
652 quantification achieved with kallisto (quant --single -l 363.4 -s 85.53354). Quantifications were  
653 performed separately on the transcript alone and on the transcript plus read-through annotation.

654 Quantifications in mutant strains compared to wt were performed using the package DESeq2 with R  
655 (v3.4.4). For differential expression analyses, we tested for log<sub>2</sub> fold change superior to 0.5 or inferior  
656 to -0.5. For read-through events, we tested for a log<sub>2</sub> fold change superior to 0 compared to the wild  
657 type to declare the read-through present in the mutant background. For all analyses, we selected p-  
658 values with an FDR ≤ 0.05. The package ggplot2 (v2.2.1) was used for graphics.

### 659 **High-resolution tiling arrays**

660 For transcriptome analysis in G1 phase, *Δbar1* cells were grown at 30°C in YEP-R to mid-log phase,  
661 collected by filtration, washed with dH<sub>2</sub>O, and re-suspended at an OD<sub>600</sub> of 0.3–0.4 in YEP-R containing  
662 3 μg/ml α-factor. After 1.5 h, galactose was added to 2% and, after another 2.5 h, 100 ml cells of OD<sub>600</sub>  
663 = 0.6–0.8 were harvested by centrifugation at room temperature for RNA isolation. For transcriptome  
664 analysis during G2 phase, cells were grown at 30°C in YEP-R to mid-log phase, collected by filtration,  
665 washed with dH<sub>2</sub>O, and re-suspended at an OD<sub>600</sub> of 0.3–0.4 in YEP-R containing 3 μg/ml α-factor. After  
666 one hour, additional α-factor was added to 3 μg/ml and 30 min later galactose was added to 2%. After  
667 another 30 min, cells were collected by filtration, washed with dH<sub>2</sub>O and re-suspended in YEP-RG with  
668 3 μg/ml α-factor. Fresh α-factor was added to 3 μg/ml after one hour. After another hour, cells were  
669 collected by filtration, washed with dH<sub>2</sub>O and re-suspended in YEP-RG with 10 μg/ml nocodazole. 1.5  
670 h after the release from G1 phase, 100 ml culture with OD<sub>600</sub> of 1.0 were harvested by centrifugation  
671 at room temperature for RNA isolation. Samples were collected for FACScan analysis at the indicated  
672 time points.

673 High-resolution tiling arrays were performed and analysed as described (Xu et al., 2009). In brief, RNA  
674 isolated from yeast cells was reverse transcribed to cDNA with a mixture of random hexamers and  
675 oligo-dT primers, labelled and hybridized to tiled Affymetrix arrays of the budding yeast genome (S288c  
676 Genome Chip, <http://www-sequence.stanford.edu/s288c/1lq.html>). Transcripts that were two-fold or  
677 more up- or downregulated are listed in Table S5.

### 678 **Accession number**

679 RNA-seq data are accessible from the Gene Expression Omnibus (GEO) database under the accession  
680 number GSE112281.



681 **Antibodies**

682 Antibodies used in this study are listed in Table S4.

683

684 **Acknowledgements**

685 We thank Vincent Vanoosthuyse and André Verdel for fruitful discussions, and V. Vanoosthuyse for  
686 critical reading of the manuscript. We are grateful to François Bachant, Kim Nasmyth, Chris Norbury,  
687 Jean-Paul Javerzat, Masayuki Yamamoto and the Yeast Genetic Resource Center of the National  
688 BioResource Project–Japan for strains, and to Keith Gull for the TAT1 antibody. We thank the Pôle  
689 Scientifique de Modélisation Numérique (PSMN) of ENS-Lyon and the Biocomputing Pole of the LBMC  
690 for in-silico analyses. We acknowledge the help of Hélène Polveche and Lorraine Soudade during the  
691 initial phase of bioinformatics analyses. Clémence Hocquet is supported by a PhD studentship from the  
692 Ministère de l'Enseignement Supérieur et de la Recherche and from the Fondation pour la Recherche  
693 Médicale (grant FDT20170437039). Xavier Robellet is supported by a post-doctoral fellowship from the  
694 ANR. Research in the Bernard lab is supported by the CNRS, the ANR (grant ANR-15-CE12-0002-01),  
695 the Fondation ARC pour la Recherche sur le Cancer (grant PJA 20151203343) and the Comité du Rhône  
696 de la Ligue Nationale contre le Cancer. This research in the Marguerat lab was supported by the UK  
697 Medical Research Council. Research in the Haering and Steimetz labs is supported by EMBL.

698

699 **Competing interests**

700 The authors declare no financial and non-financial competing interest

701

## 702 References

- 703 Andrulis, E.D., Werner, J., Nazarian, A., Erdjument-Bromage, H., Tempst, P., Lis, J.T., 2002. The RNA  
704 processing exosome is linked to elongating RNA polymerase II in *Drosophila*. *Nature* 420, 837–  
705 41. <https://doi.org/10.1038/nature01181>
- 706 Aoi, Y., Kawashima, S.A., Simanis, V., Yamamoto, M., Sato, M., 2014. Optimization of the analogue-  
707 sensitive Cdc2/Cdk1 mutant by in vivo selection eliminates physiological limitations to its use  
708 in cell cycle analysis. *Open Biol.* 4. <https://doi.org/10.1098/rsob.140063>
- 709 Balasubramanian, M.K., McCollum, D., Chang, L., Wong, K.C., Naqvi, N.I., He, X., Sazer, S., Gould, K.L.,  
710 1998. Isolation and characterization of new fission yeast cytokinesis mutants. *Genetics* 149,  
711 1265–1275.
- 712 Bhalla, N., Biggins, S., Murray, A.W., 2002. Mutation of YCS4, a budding yeast condensin subunit,  
713 affects mitotic and nonmitotic chromosome behavior. *Mol Biol Cell* 13, 632–45.
- 714 Buhler, M., Haas, W., Gygi, S.P., Moazed, D., 2007. RNAi-dependent and -independent RNA turnover  
715 mechanisms contribute to heterochromatic gene silencing. *Cell* 129, 707–21.  
716 <https://doi.org/10.1016/j.cell.2007.03.038>
- 717 Chang, F., Drubin, D., Nurse, P., 1997. cdc12p, a protein required for cytokinesis in fission yeast, is a  
718 component of the cell division ring and interacts with profilin. *J. Cell Biol.* 137, 169–182.
- 719 Chen, D., Dundr, M., Wang, C., Leung, A., Lamond, A., Misteli, T., Huang, S., 2005. Condensed mitotic  
720 chromatin is accessible to transcription factors and chromatin structural proteins. *J Cell Biol*  
721 168, 41–54. <https://doi.org/10.1083/jcb.200407182>
- 722 Cuylen, S., Metz, J., Haering, C.H., 2011. Condensin structures chromosomal DNA through topological  
723 links. *Nat Struct Mol Biol* 18, 894–901. <https://doi.org/10.1038/nsmb.2087>
- 724 Cuylen, S., Metz, J., Hruby, A., Haering, C.H., 2013. Entrapment of chromosomes by condensin rings  
725 prevents their breakage during cytokinesis. *Dev. Cell* 27, 469–478.  
726 <https://doi.org/10.1016/j.devcel.2013.10.018>
- 727 D’Ambrosio, C., Kelly, G., Shirahige, K., Uhlmann, F., 2008. Condensin-Dependent rDNA Decatenation  
728 Introduces a Temporal Pattern to Chromosome Segregation. *Curr. Biol.* 18, 1084–1089.  
729 <https://doi.org/10.1016/j.cub.2008.06.058>
- 730 D’Ambrosio, C., Schmidt, C.K., Katou, Y., Kelly, G., Itoh, T., Shirahige, K., Uhlmann, F., 2008.  
731 Identification of cis-acting sites for condensin loading onto budding yeast chromosomes.  
732 *Genes Dev* 22, 2215–27.
- 733 Downen, J.M., Bilodeau, S., Orlando, D.A., Hübner, M.R., Abraham, B.J., Spector, D.L., Young, R.A., 2013.  
734 Multiple Structural Maintenance of Chromosome Complexes at Transcriptional Regulatory  
735 Elements. *Stem Cell Rep. Vol. I*, 371–378.
- 736 Downen, J.M., Young, R.A., 2014. SMC complexes link gene expression and genome architecture. *Curr.*  
737 *Opin. Genet. Dev.*, Genome architecture and expression 25, 131–137.  
738 <https://doi.org/10.1016/j.gde.2013.11.009>
- 739 Freeman, L., Aragon-Alcaide, L., Strunnikov, A., 2000. The Condensin Complex Governs Chromosome  
740 Condensation and Mitotic Transmission of Rdna. *J. Cell Biol.* 149, 811–824.  
741 <https://doi.org/10.1083/jcb.149.4.811>
- 742 Ganji, M., Shaltiel, I.A., Bisht, S., Kim, E., Kalichava, A., Haering, C.H., Dekker, C., 2018. Real-time  
743 imaging of DNA loop extrusion by condensin. *Science* 360, 102–105.  
744 <https://doi.org/10.1126/science.aar7831>
- 745 Gibcus, J.H., Samejima, K., Goloborodko, A., Samejima, I., Naumova, N., Nuebler, J., Kanemaki, M.T.,  
746 Xie, L., Paulson, J.R., Earnshaw, W.C., Mirny, L.A., Dekker, J., 2018. A pathway for mitotic  
747 chromosome formation. *Science* 359. <https://doi.org/10.1126/science.aao6135>
- 748 Graham, A.C., Kiss, D.L., Andrulis, E.D., 2009. Core exosome-independent roles for Rrp6 in cell cycle  
749 progression. *Mol Biol Cell* 20, 2242–53. <https://doi.org/10.1091/mbc.E08-08-0825>
- 750 Hagan, I.M., 2016. Chromatin and Cell Wall Staining of *Schizosaccharomyces pombe*. *Cold Spring Harb.*  
751 *Protoc.* 2016, pdb.prot091025. <https://doi.org/10.1101/pdb.prot091025>

- 752 Harigaya, Y., Tanaka, H., Yamanaka, S., Tanaka, K., Watanabe, Y., Tsutsumi, C., Chikashige, Y., Hiraoka,  
753 Y., Yamashita, A., Yamamoto, M., 2006. Selective elimination of messenger RNA prevents an  
754 incidence of untimely meiosis. *Nature* 442, 45–50. <https://doi.org/10.1038/nature04881>
- 755 He, H., Zhang, S., Wang, D., Hochwagen, A., Li, F., 2016. Condensin Promotes Position Effects within  
756 Tandem DNA Repeats via the RITS Complex. *Cell Rep.* 14, 1018–1024.  
757 <https://doi.org/10.1016/j.celrep.2016.01.006>
- 758 Hihara, S., Pack, C.G., Kaizu, K., Tani, T., Hanafusa, T., Nozaki, T., Takemoto, S., Yoshimi, T., Yokota, H.,  
759 Imamoto, N., Sako, Y., Kinjo, M., Takahashi, K., Nagai, T., Maeshima, K., 2012. Local  
760 nucleosome dynamics facilitate chromatin accessibility in living mammalian cells. *Cell Rep* 2,  
761 1645–56. <https://doi.org/10.1016/j.celrep.2012.11.008>
- 762 Hirano, T., 2016. Condensin-Based Chromosome Organization from Bacteria to Vertebrates. *Cell* 164,  
763 847–857. <https://doi.org/10.1016/j.cell.2016.01.033>
- 764 Hiraoka, Y., Toda, T., Yanagida, M., 1984. The NDA3 gene of fission yeast encodes beta-tubulin: a cold-  
765 sensitive *nda3* mutation reversibly blocks spindle formation and chromosome movement in  
766 mitosis. *Cell* 39, 349–58.
- 767 Hyun-Soo Kim, V.V., , Jeffrey Fillingham, Assen Roguev, Stephen Watt, Thomas Kislinger, A.T., Laura  
768 Rocco Carpenter, Christopher S. Bennett, Andrew Emili,, Jack F Greenblatt, K.G.H., Nevan J.  
769 Krogan, Jürg Bähler & Michael-Christopher Keog, 2009. An acetylated form of histone H2A.Z  
770 regulates chromosome architecture in *Schizosaccharomyces pombe*. *Nat. Struct. Mol. Biol.* In  
771 press.
- 772 Ideue, T., Azad, A.K., Yoshida, J., Matsusaka, T., Yanagida, M., Ohshima, Y., Tani, T., 2004. The nucleolus  
773 is involved in mRNA export from the nucleus in fission yeast. *J. Cell Sci.* 117, 2887–2895.  
774 <https://doi.org/10.1242/jcs.01155>
- 775 Ing-Simmons, E., Seitan, V.C., Faure, A.J., Flicek, P., Carroll, T., Dekker, J., Fisher, A.G., Lenhard, B.,  
776 Merckenschlager, M., 2015. Spatial enhancer clustering and regulation of enhancer-proximal  
777 genes by cohesin. *Genome Res.* 25, 504–513. <https://doi.org/10.1101/gr.184986.114>
- 778 Iwasaki, O., Tanaka, A., Tanizawa, H., Grewal, S.I., Noma, K., 2010. Centromeric localization of  
779 dispersed Pol III genes in fission yeast. *Mol Biol Cell* 21, 254–65.  
780 <https://doi.org/10.1091/mbc.E09-09-0790>
- 781 Kagey, M.H., Newman, J.J., Bilodeau, S., Zhan, Y., Orlando, D.A., van Berkum, N.L., Ebmeier, C.C.,  
782 Goossens, J., Rahl, P.B., Levine, S.S., Taatjes, D.J., Dekker, J., Young, R.A., 2010. Mediator and  
783 cohesin connect gene expression and chromatin architecture. *Nature* 467, 430–5.  
784 <https://doi.org/10.1038/nature09380>
- 785 Keifenheim, D., Sun, X.-M., D’Souza, E., Ohira, M.J., Magner, M., Mayhew, M.B., Marguerat, S., Rhind,  
786 N., 2017. Size-Dependent Expression of the Mitotic Activator Cdc25 Suggests a Mechanism of  
787 Size Control in Fission Yeast. *Curr. Biol.* CB 27, 1491–1497.e4.  
788 <https://doi.org/10.1016/j.cub.2017.04.016>
- 789 Kilchert, C., Wittmann, S., Vasiljeva, L., 2016. The regulation and functions of the nuclear RNA exosome  
790 complex. *Nat. Rev. Mol. Cell Biol.* 17, 227–239. <https://doi.org/10.1038/nrm.2015.15>
- 791 Kim, J.H., Zhang, T., Wong, N.C., Davidson, N., Maksimovic, J., Oshlack, A., Earnshaw, W.C., Kalitsis, P.,  
792 Hudson, D.F., 2013. Condensin I associates with structural and gene regulatory regions in  
793 vertebrate chromosomes. *Nat Commun* 4, 2537. <https://doi.org/10.1038/ncomms3537>
- 794 Kim, K.-D., Tanizawa, H., Iwasaki, O., Noma, K.-I., 2016. Transcription factors mediate condensin  
795 recruitment and global chromosomal organization in fission yeast. *Nat. Genet.* 48, 1242–1252.  
796 <https://doi.org/10.1038/ng.3647>
- 797 Kranz, A.L., Jiao, C.Y., Winterkorn, L.H., Albritton, S.E., Kramer, M., Ercan, S., 2013. Genome-wide  
798 analysis of condensin binding in *Caenorhabditis elegans*. *Genome Biol* 14, R112.  
799 <https://doi.org/10.1186/gb-2013-14-10-r112>
- 800 Kruesi, W.S., Core, L.J., Waters, C.T., Lis, J.T., Meyer, B.J., 2013. Condensin controls recruitment of RNA  
801 polymerase II to achieve nematode X-chromosome dosage compensation. *Elife* 2, e00808.  
802 <https://doi.org/10.7554/eLife.00808>

- 803 Kschonsak, M., Merkel, F., Bisht, S., Metz, J., Rybin, V., Hassler, M., Haering, C.H., 2017. Structural Basis  
804 for a Safety-Belt Mechanism That Anchors Condensin to Chromosomes. *Cell* 171, 588–600.e24.  
805 <https://doi.org/10.1016/j.cell.2017.09.008>
- 806 Lemay, J.-F., Larochele, M., Marguerat, S., Atkinson, S., Bähler, J., Bachand, F., 2014. The RNA exosome  
807 promotes transcription termination of backtracked RNA polymerase II. *Nat. Struct. Mol. Biol.*  
808 21, 919–926. <https://doi.org/10.1038/nsmb.2893>
- 809 Li, W., Hu, Y., Oh, S., Ma, Q., Merkurjev, D., Song, X., Zhou, X., Liu, Z., Tanasa, B., He, X., Chen, A.Y.,  
810 Ohgi, K., Zhang, J., Liu, W., Rosenfeld, M.G., 2015. Condensin I and II Complexes License Full  
811 Estrogen Receptor  $\alpha$ -Dependent Enhancer Activation. *Mol. Cell* 59, 188–202.  
812 <https://doi.org/10.1016/j.molcel.2015.06.002>
- 813 Li, W., Notani, D., Ma, Q., Tanasa, B., Nunez, E., Chen, A.Y., Merkurjev, D., Zhang, J., Ohgi, K., Song, X.,  
814 Oh, S., Kim, H.-S., Glass, C.K., Rosenfeld, M.G., 2013. Functional roles of enhancer RNAs for  
815 oestrogen-dependent transcriptional activation. *Nature* 498, 516–520.  
816 <https://doi.org/10.1038/nature12210>
- 817 Longworth, M.S., Walker, J.A., Anderssen, E., Moon, N.S., Gladden, A., Heck, M.M., Ramaswamy, S.,  
818 Dyson, N.J., 2012. A shared role for RBF1 and dCAP-D3 in the regulation of transcription with  
819 consequences for innate immunity. *PLoS Genet* 8, e1002618.  
820 <https://doi.org/10.1371/journal.pgen.1002618>
- 821 Lupo, R., Breiling, A., Bianchi, M.E., Orlando, V., 2001. Drosophila chromosome condensation proteins  
822 Topoisomerase II and Barren colocalize with Polycomb and maintain Fab-7 PRE silencing. *Mol*  
823 *Cell* 7, 127–36.
- 824 Merckenschlager, M., Nora, E.P., 2016. CTCF and Cohesin in Genome Folding and Transcriptional Gene  
825 Regulation. *Annu. Rev. Genomics Hum. Genet.* 17, 17–43. <https://doi.org/10.1146/annurev-genom-083115-022339>
- 827 Moreno, S., Klar, A., Nurse, P., 1991. Molecular genetic analysis of fission yeast *Schizosaccharomyces*  
828 *pombe*. *Methods Enzym.* 194, 795–823.
- 829 Mueller, F., Senecal, A., Tantale, K., Marie-Nelly, H., Ly, N., Collin, O., Basyuk, E., Bertrand, E., Darzacq,  
830 X., Zimmer, C., 2013. FISH-quant: automatic counting of transcripts in 3D FISH images. *Nat.*  
831 *Methods* 10, 277–278. <https://doi.org/10.1038/nmeth.2406>
- 832 Murakami-Tonami, Y., Kishida, S., Takeuchi, I., Katou, Y., Maris, J.M., Ichikawa, H., Kondo, Y., Sekido,  
833 Y., Shirahige, K., Murakami, H., Kadomatsu, K., 2014. Inactivation of SMC2 shows a synergistic  
834 lethal response in MYCN-amplified neuroblastoma cells. *Cell Cycle Georget. Tex* 13, 1115–  
835 1131. <https://doi.org/10.4161/cc.27983>
- 836 Nakazawa, N., Mehrotra, R., Ebe, M., Yanagida, M., 2011. Condensin phosphorylated by the Aurora-B-  
837 like kinase Ark1 is continuously required until telophase in a mode distinct from Top2. *J Cell*  
838 *Sci* 124, 1795–807. <https://doi.org/10.1242/jcs.078733>
- 839 Niwa, O., Yanagida, M., 1985. Triploid meiosis and aneuploidy in *Schizosaccharomyces pombe*: an unstable aneuploid disomic for  
840 chromosome III. *Curr. Genet.* 9, 463–470. <https://doi.org/10.1007/BF00434051>
- 842 Palozola, K.C., Donahue, G., Liu, H., Grant, G.R., Becker, J.S., Cote, A., Yu, H., Raj, A., Zaret, K.S., 2017.  
843 Mitotic transcription and waves of gene reactivation during mitotic exit. *Science* 358, 119–122.  
844 <https://doi.org/10.1126/science.aal4671>
- 845 Paul, B., Montpetit, B., 2016. Altered RNA processing and export lead to retention of mRNAs near  
846 transcription sites and nuclear pore complexes or within the nucleolus. *Mol. Biol. Cell* 27,  
847 2742–2756. <https://doi.org/10.1091/mbc.E16-04-0244>
- 848 Paul, M.R., Markowitz, T.E., Hochwagen, A., Ercan, S., 2017. Acute condensin depletion causes genome  
849 decompaction without altering the level of global gene expression in *Saccharomyces*  
850 *cerevisiae*. *bioRxiv* 195487. <https://doi.org/10.1101/195487>
- 851 Petrova, B., Dehler, S., Kruitwagen, T., Heriche, J.K., Miura, K., Haering, C.H., 2013. Quantitative analysis  
852 of chromosome condensation in fission yeast. *Mol Cell Biol* 33, 984–98.  
853 <https://doi.org/10.1128/MCB.01400-12>

- 854 Rao, S.S.P., Huang, S.-C., Glenn St Hilaire, B., Engreitz, J.M., Perez, E.M., Kieffer-Kwon, K.-R., Sanborn,  
855 A.L., Johnstone, S.E., Bascom, G.D., Bochkov, I.D., Huang, X., Shamim, M.S., Shin, J., Turner, D.,  
856 Ye, Z., Omer, A.D., Robinson, J.T., Schlick, T., Bernstein, B.E., Casellas, R., Lander, E.S., Aiden,  
857 E.L., 2017. Cohesin Loss Eliminates All Loop Domains. *Cell* 171, 305–320.e24.  
858 <https://doi.org/10.1016/j.cell.2017.09.026>
- 859 Rawlings, J.S., Gatzka, M., Thomas, P.G., Ihle, J.N., 2011. Chromatin condensation via the condensin II  
860 complex is required for peripheral T-cell quiescence. *Embo J* 30, 263–76.  
861 <https://doi.org/10.1038/emboj.2010.314>
- 862 Robellet, X., Fauque, L., Legros, P., Mollereau, E., Janczarski, S., Parrinello, H., Desvignes, J.P., Thevenin,  
863 M., Bernard, P., 2014. A genetic screen for functional partners of condensin in fission yeast.  
864 *G3 Bethesda* 4, 373–81. <https://doi.org/10.1534/g3.113.009621>
- 865 Robellet, X., Vanoosthuyse, V., Bernard, P., 2017. The loading of condensin in the context of chromatin.  
866 *Curr. Genet.* 63, 577–589. <https://doi.org/10.1007/s00294-016-0669-0>
- 867 Saitoh, S., Takahashi, K., Yanagida, M., 1997. Mis6, a fission yeast inner centromere protein, acts during  
868 G1/S and forms specialized chromatin required for equal segregation. *Cell* 90, 131–43.
- 869 Saka, Y., Sutani, T., Yamashita, Y., Saitoh, S., Takeuchi, M., Nakaseko, Y., Yanagida, M., 1994. Fission  
870 yeast cut3 and cut14, members of a ubiquitous protein family, are required for chromosome  
871 condensation and segregation in mitosis. *Embo J* 13, 4938–52.
- 872 Samoshkin, A., Dulev, S., Loukinov, D., Rosenfeld, J.A., Strunnikov, A.V., 2012. Condensin dysfunction  
873 in human cells induces nonrandom chromosomal breaks in anaphase, with distinct patterns  
874 for both unique and repeated genomic regions. *Chromosoma* 121, 191–9.  
875 <https://doi.org/10.1007/s00412-011-0353-6>
- 876 Schalbetter, S.A., Goloborodko, A., Fudenberg, G., Belton, J.-M., Miles, C., Yu, M., Dekker, J., Mirny, L.,  
877 Baxter, J., 2017. SMC complexes differentially compact mitotic chromosomes according to  
878 genomic context. *Nat. Cell Biol.* 19, 1071–1080. <https://doi.org/10.1038/ncb3594>
- 879 Sheltzer, J.M., Torres, E.M., Dunham, M.J., Amon, A., 2012. Transcriptional consequences of  
880 aneuploidy. *Proc. Natl. Acad. Sci. U. S. A.* 109, 12644–12649.  
881 <https://doi.org/10.1073/pnas.1209227109>
- 882 Sipiczki, M., 2000. Where does fission yeast sit on the tree of life? *Genome Biol.* 1, REVIEWS1011.  
883 <https://doi.org/10.1186/gb-2000-1-2-reviews1011>
- 884 Sutani, T., Yuasa, T., Tomonaga, T., Dohmae, N., Takio, K., Yanagida, M., 1999. Fission yeast condensin  
885 complex: essential roles of non-SMC subunits for condensation and Cdc2 phosphorylation of  
886 Cut3/SMC4. *Genes Dev* 13, 2271–83.
- 887 Toselli-Mollereau, E., Robellet, X., Fauque, L., Lemaire, S., Schiklenk, C., Klein, C., Hocquet, C., Legros,  
888 P., N'Guyen, L., Mouillard, L., Chautard, E., Auboeuf, D., Haering, C.H., Bernard, P., 2016.  
889 Nucleosome eviction in mitosis assists condensin loading and chromosome condensation.  
890 *EMBO J.* 35, 1565–1581. <https://doi.org/10.15252/emboj.201592849>
- 891 Uhlmann, F., 2016. SMC complexes: from DNA to chromosomes. *Nat. Rev. Mol. Cell Biol.* 17, 399–412.  
892 <https://doi.org/10.1038/nrm.2016.30>
- 893 van Ruiten, M.S., Rowland, B.D., 2018. SMC Complexes: Universal DNA Looping Machines with Distinct  
894 Regulators. *Trends Genet. TIG.* <https://doi.org/10.1016/j.tig.2018.03.003>
- 895 Vanoosthuyse, V., Legros, P., van der Sar, S.J., Yvert, G., Toda, K., Le Bihan, T., Watanabe, Y., Hardwick,  
896 K., Bernard, P., 2014. CPF-associated phosphatase activity opposes condensin-mediated  
897 chromosome condensation. *PLoS Genet* 10, e1004415.  
898 <https://doi.org/10.1371/journal.pgen.1004415>
- 899 Walther, N., Hossain, M.J., Politi, A.Z., Koch, B., Kueblbeck, M., Ødegård-Fougner, Ø., Lampe, M.,  
900 Ellenberg, J., 2018. A quantitative map of human Condensins provides new insights into mitotic  
901 chromosome architecture. *J. Cell Biol.* <https://doi.org/10.1083/jcb.201801048>
- 902 Wang, D., Mansisidor, A., Prabhakar, G., Hochwagen, A., 2016. Condensin and Hmo1 Mediate a  
903 Starvation-Induced Transcriptional Position Effect within the Ribosomal DNA Array. *Cell Rep.*  
904 14, 1010–1017. <https://doi.org/10.1016/j.celrep.2016.01.005>

- 905 Wang, S.W., Asakawa, K., Win, T.Z., Toda, T., Norbury, C.J., 2005. Inactivation of the pre-mRNA cleavage  
906 and polyadenylation factor Pfs2 in fission yeast causes lethal cell cycle defects. *Mol Cell Biol*  
907 25, 2288–96.
- 908 Warburton, P.E., Hasson, D., Guillem, F., Lescale, C., Jin, X., Abrusan, G., 2008. Analysis of the largest  
909 tandemly repeated DNA families in the human genome. *BMC Genomics* 9, 533.  
910 <https://doi.org/10.1186/1471-2164-9-533>
- 911 Wilhelm, B.T., Marguerat, S., Watt, S., Schubert, F., Wood, V., Goodhead, I., Penkett, C.J., Rogers, J.,  
912 Bahler, J., 2008. Dynamic repertoire of a eukaryotic transcriptome surveyed at single-  
913 nucleotide resolution. *Nature* 453, 1239–43. <https://doi.org/10.1038/nature07002>
- 914 Woodward, J., Taylor, G.C., Soares, D.C., Boyle, S., Sie, D., Read, D., Chathoth, K., Vukovic, M., Tarrats,  
915 N., Jamieson, D., Campbell, K.J., Blyth, K., Acosta, J.C., Ylstra, B., Arends, M.J., Kranc, K.R.,  
916 Jackson, A.P., Bickmore, W.A., Wood, A.J., 2016. Condensin II mutation causes T-cell lymphoma  
917 through tissue-specific genome instability. *Genes Dev.* 30, 2173–2186.  
918 <https://doi.org/10.1101/gad.284562.116>
- 919 Xu, Z., Wei, W., Gagneur, J., Perocchi, F., Clauder-Münster, S., Camblong, J., Guffanti, E., Stutz, F.,  
920 Huber, W., Steinmetz, L.M., 2009. Bidirectional promoters generate pervasive transcription in  
921 yeast. *Nature* 457, 1033–1037. <https://doi.org/10.1038/nature07728>
- 922 Yamanaka, S., Yamashita, A., Harigaya, Y., Iwata, R., Yamamoto, M., 2010. Importance of  
923 polyadenylation in the selective elimination of meiotic mRNAs in growing *S. pombe* cells. *Embo*  
924 *J* 29, 2173–81. <https://doi.org/10.1038/emboj.2010.108>
- 925 Yuen, K.C., Slaughter, B.D., Gerton, J.L., 2017. Condensin II is anchored by TFIIIC and H3K4me3 in the  
926 mammalian genome and supports the expression of active dense gene clusters. *Sci. Adv.* 3,  
927 e1700191. <https://doi.org/10.1126/sciadv.1700191>
- 928 Zhou, Y., Zhu, J., Schermann, G., Ohle, C., Bendrin, K., Sugioka-Sugiyama, R., Sugiyama, T., Fischer, T.,  
929 2015. The fission yeast MTREC complex targets CUTs and unspliced pre-mRNAs to the nuclear  
930 exosome. *Nat. Commun.* 6, 7050. <https://doi.org/10.1038/ncomms8050>
- 931 Zofall, M., Fischer, T., Zhang, K., Zhou, M., Cui, B., Veenstra, T.D., Grewal, S.I., 2009. Histone H2A.Z  
932 cooperates with RNAi and heterochromatin factors to suppress antisense RNAs. *Nature* 461,  
933 419–22.
- 934
- 935

## 936 **Figure Legends**

### 937 **Figure 1. The condensin loss-of-function mutant *cut14-208* accumulates RNA-exosome-sensitive** 938 **transcripts**

939 **A.** Volcano plot of RNA levels measured by strand-specific RNA-seq in the *cut14-208* condensin mutant  
940 after 1 cell doubling at 36°C, from biological triplicates. Genes exhibiting a log<sub>2</sub> fold change superior  
941 to 0.5 or inferior to -0.5 with an adjusted P-value (padj) ≤ 0.05 are indicated in red. **B.** RT-qPCR  
942 validation. Total RNA from cells grown at 36°C for 2.5 hours was reverse-transcribed in the presence  
943 or absence of Reverse Transcriptase (RT) and cDNAs were quantified by qPCR. Shown are the averages  
944 and standard deviations (SDs) measured from 3 biological replicates. **C.** Misregulated RNA in *cut14-*  
945 *208*. **D.** Northern blot analysis of the non-coding RNA *mug93as*. Cells were shifted at 36°C for 1 cell  
946 doubling and total RNA probed for *mug93as* level. Ribosomal RNA (rRNA) stained with ethidium  
947 bromide (EtBr) was used as loading control. **E.** Volcano plot of RNA levels measured by RNA-seq from  
948 biological triplicates of the *rrp6Δ* mutant after 1 cell doubling at 36°C. Genes exhibiting a log<sub>2</sub> fold  
949 change superior to 0.5 or inferior to -0.5 with an adjusted P-value (padj) ≤ 0.05 are indicated in red.  
950 **F.** Misregulated RNA in *rrp6Δ*. **G.** Genes misregulated in *cut14-208* and *rrp6Δ*. **H.** Comparison plots  
951 between the transcriptomes of *cut14-208* and *rrp6Δ*. Genes differentially expressed in both mutants  
952 are highlighted in red. The correlation coefficient has been calculated for all genes.

953

### 954 **Figure 2. The condensin loss-of-function mutant *cut14-208* accumulates 3'-extended read-through** 955 **transcripts**

956 **A.** 3'-extended *hsp9* read-through RNA detected by strand-specific RNA-seq in *cut14-208*. **B.** Read-  
957 through *hsp9* RNA detected by RNase H digestion and Northern blotting. Total RNA from indicated  
958 strains grown at 36°C was digested by RNase H in the presence of a DNA oligonucleotide  
959 complementary to the 5' end of *hsp9* mRNA. Cleaved products were revealed by a probe hybridizing  
960 downstream the transcription termination site of *hsp9* (see probe2 in A), or within the coding sequence  
961 (probe 1, shown in A). rDNA stained with EtBr served as loading control. **C.** 3'-extended read-through  
962 RNAs in *cut14-208*. **D.** Polyadenylated RNAs detected by oligo(dT)-primed RT-PCR. Cells were grown at  
963 36°C for 2.5 hours in PMG supplemented with 60 μM thiamine to repress *nmt1-dis3*. Total RNA was  
964 reverse transcribed using oligo(dT) primers in the presence or absence of RT. cDNA were amplified by  
965 25 cycles of PCR using oligo(dT) and gene specific primers. Minus RT reactions produced no signal. **E.**  
966 3'-extended read-through RNAs in *rrp6Δ*. **F.** Overlap between the sets of read-through RNAs in *cut14-*  
967 *208* and *rrp6Δ*.

968

969 **Figure 3. The function of condensin is dispensable for gene regulation during S and G2 phases of the**  
970 **cell cycle in fission yeast**

971 **A-C.** Gene expression was assessed in synchronized *cut14-208* cells progressing from early S phase to  
972 G1 phase at the restrictive temperature. **A.** Scheme of the experiment. **B.** Left panel: FACScan analyses.  
973 Right panels: chromosome segregation and cytokinesis assessed by staining DNA with DAPI and the  
974 septum with calcofluor ( $n \geq 100$ ). **C.** Total RNA extracted from *cdc10-129* and *cdc10-129 cut14-208*  
975 cells shown in **B**, was reverse-transcribed in the presence or absence of RT and cDNA quantified by  
976 qPCR. Red line = 1. Shown are averages  $\pm$  SDs measured from biological triplicates. **D-F.** Gene  
977 expression was assessed in synchronized *cut14-208* cells progressing from early S phase to late G2  
978 phase at the restrictive temperature. **D.** Scheme of the experiment. **E.** FACScan analyses. **F.** Total RNA  
979 extracted from *cdc25-22* and *cdc25-22 cut14-208* cells shown in **E**, was reverse-transcribed in the  
980 presence or absence of RT and cDNA quantified by qPCR. Shown are averages  $\pm$  SDs measured from  
981 biological triplicates. **G-I.** Gene expression was assessed in synchronized *cut14-208* cells progressing  
982 from early S phase to metaphase at the restrictive temperature. **G.** Scheme of the experiment.  
983 Thiamine repressed the *nmt41-slp1* gene in order to arrest cells in metaphase. **H.** Percentages of  
984 mononucleate, mitotic cells from  $n = 3$  experiments. **I.** Total RNA extracted from *nmt41-slp1* and  
985 *nmt41-slp1 cut14-208* cells shown in **H** was reverse-transcribed in the presence or absence of RT and  
986 cDNA quantified by qPCR. Shown are averages  $\pm$  SDs measured from biological triplicates.

987

988 **Figure 4. Condensin release from chromosomes has no major effects on G1 or M phase gene**  
989 **expression programs in budding yeast.**

990 **A.** TEV protease expression was induced in cells synchronized in G1 phase by  $\alpha$ -factor (strains C3138  
991 and C3139). 2.5 h after TEV induction, RNA was extracted, cDNA synthesized, labelled and hybridized  
992 to tiling arrays. Cell cycle synchronization was scored by FACScan analysis of cellular DNA content and  
993 Brn1 cleavage was monitored by western blotting against the C-terminal HA<sub>6</sub> tag. **B.** Scatter plot of  
994 gene expression values of cells from **A** with cleaved or intact Brn1 (mean values of  $n=3$  biological  
995 replicates). Red color highlights two-fold or more up- or downregulated transcripts. **C.** TEV protease  
996 expression was induced in cells synchronized in G1 phase by  $\alpha$ -factor (strains C2335 and C2455). Cells  
997 were release into nocodazole 2.5 h after TEV induction and RNA was extracted 1.5 h later, cDNA  
998 synthesized, labelled and hybridized on tiling arrays. Cell cycle synchronization and Brn1 cleavage was  
999 monitored as in **A**. **D.** Scatter plot of gene expression values of cells from **C** with cleaved or intact Brn1



1000 (mean valued of n=2 biological replicates). Red color highlights two-fold or more up- or downregulated  
1001 transcripts.

1002

1003 **Figure 5. Defective mitosis underlies deregulated gene expression in the fission yeast *cut14-208***  
1004 **condensin mutant**

1005 **A.** Gene deregulation in mutant cells in which chromosomes are cut by the cytokinetic ring upon  
1006 mitotic exit. Strains grown at 36°C for 2.5 hours were processed for cytological analysis and RT-qPCR.  
1007 Right: cells were stained with DAPI and calcofluor to visualise DNA and the septum, respectively, and  
1008 to quantify the frequency of chromosome cutting by the septum (CUT cells). Left: total RNA was  
1009 reverse-transcribed in the presence or absence RT and cDNA quantified by qPCR. Shown are averages  
1010  $\pm$  SDs calculated from 3 biological replicates. **B-E.** Preventing chromosome severing restores normal  
1011 gene expression in the condensin mutant *cut14-208*. **B.** Cells were grown at 36°C for 2.5 hours and  
1012 stained with DAPI and calcofluor to reveal DNA and the septum, and measure the frequency of CUT  
1013 cells, or treated for FACScan analysis of DNA content. **C.** Volcano plot of RNA levels measured by  
1014 strand-specific RNA-seq in the *cdc15-140 cut14-208* double mutant after 2.5 hours at 36°C, from  
1015 biological triplicates. **D.** Comparative RNA-seq transcriptomic analysis from biological triplicates. **E.**  
1016 RNA-seq profiles of the *mug93* ncRNA.

1017

1018 **Figure 6. Condensin inactivation generates anucleolate daughter cells in fission yeast, which are**  
1019 **depleted of the RNases Rrp6 and Dis3 and accumulate unstable RNA**

1020 **A-B.** The kinetochore mutation *mis6-302* and the condensin mutation *cut14-208* deregulate a same  
1021 set of genes. Wildtype and *mis6-302* cells grown at 36°C for 8 hours were processed to analyse DNA  
1022 content by FACScan (**A**) and RNA levels by RT-qPCR (**B**). *cut14-208* cells and the isogenic wt control  
1023 grown at 36°C for 2.5 hours were used for comparison. Shown are averages  $\pm$  SDs measured from  
1024 biological triplicates. **C.** Non-disjunction of the rDNA in *cut14-208* and *mis6-302* cells. The nucleolar  
1025 protein Gar2-mcherry was used as a marker for the rDNA and the plasma membrane protein Psy1-GFP  
1026 to visualise cytokinesis. Mutant cells and their isogenic wt controls were grown at 36°C for 2.5h (*cut14-*  
1027 *208*) or 8 hours (*mis6-302*), fixed and stained with DAPI. Segregation of the rDNA in daughter nuclei  
1028 was measured upon mitotic exit. **D.** Rrp6 is enriched in the nucleolus, and depleted from anucleolate  
1029 *cut14-208* mutant cells. Indicated cells were grown at 36°C, fixed and processed for  
1030 immunofluorescence against Gar2-GFP and Rrp6-myc. DNA was stained with DAPI. Right panel shows  
1031 the ratio of Rrp6-myc signals measured within daughter nuclei in septated cells. **E-F.** The non-coding  
1032 RNA *mug93as* accumulate in anucleolate *cut14-208* cells. Cells of indicated genotype and expressing

1033 Gar2-GFP were grown at 36°C for 2.5 hours, fixed and processed for single molecule RNA FISH using  
1034 probes complementary to the ncRNA *mug93as* (E) or the mRNA *cct2* (F). Box and whiskers plots show  
1035 quantifications of RNA spots in *cut14-208* compared to wt, and in nucleolate compared to anucleolate  
1036 mutant cells. \*\*\*p<0.01, \*p<0.05 and °p>0.05.

1037

1038 **Figure 7. Condensin deficiency impinges upon gene expression by promoting accurate chromosome**  
1039 **segregation throughout mitosis**

1040 In wild-type fission yeast cells, Rrp6 and Dis3, the catalytic subunits of the RNA-exosome, are enriched  
1041 in the nucleolus and most likely co-segregate with the bulk of the rDNA during anaphase. In condensin  
1042 mutant cells, chromosomes fail to properly segregate during anaphase. Chromatin bridges are formed  
1043 and entangled sister-rDNA copies fail to separate. The non-disjunction of the rDNA upon mitotic exit  
1044 leads to the production of anucleolate daughter cells deprived of Rrp6 and Dis3, which start to  
1045 accumulate RNA molecules that are normally actively degraded by the RNA-exosome, such as unstable  
1046 ncRNA and 3'-extended RNA.

1047

1048 **Supplemental Figure S1 - related to Figure 1. The condensin loss-of-function mutant *cut14-208***  
1049 **accumulates exosome-sensitive transcripts**

1050 **A.** RT-qPCR validation of up-regulated RNA in *cut14-208* mutant cells. Total RNA extracted from wild-  
1051 type and *cut14-208* cycling cells grown for 2.5 h at the restrictive temperature of 36°C was reverse-  
1052 transcribed in the presence or absence of RT and the cDNA quantified by qPCR. Shown are averages ±  
1053 SDs measured from n = 3 biological replicates. **B.** Pol II occupancy measured by ChIP. Cells of indicated  
1054 genotypes were grown at the restrictive temperature of 36°C for 2.5 hours and processed for ChIP  
1055 against RNA Pol II phosphorylated on serine 2 of the CTD. The transcription termination mutant *pfs2-*  
1056 *11* was used as a control for Pol II accumulation in the 3' ends of genes (Wang et al., 2005). Show are  
1057 averages ± SDs calculates from 6 ChIPs performed on biological triplicates.

1058

1059 **Supplemental Figure S2 - related to Figure 2. The condensin loss-of-function mutant *cut14-208***  
1060 **accumulates 3'-extended read-through transcripts**

1061 **A.** 3'-extended *hsp9* RNA detected by RNase H digestion and Northern blotting in condensin mutant  
1062 cells. Indicated strains were grown at 36°C for 2.5 hours. Total RNA was digested by RNase H in the  
1063 presence of a DNA oligonucleotide complementary to the 5' end of *hsp9* mRNA. Cleaved products were  
1064 revealed by a probe hybridizing downstream of the transcription termination site of *hsp9* (probe 2 in

1065 Fig. 2A), or within the coding sequence (probe 1 in Fig. 2A). rDNA stained with EtBr served as loading  
1066 control. **B.** Polyadenylated RNAs detected by oligo(dT)-primed RT-PCR. Cells were grown at 36°C for  
1067 2.5 hours in PMG supplemented with 20 μM thiamine to repress *nmt1-dis3*. Total RNA was reverse  
1068 transcribed using oligo(dT) primers in the presence or absence of RT. cDNA were amplified by 25 cycles  
1069 of PCR using oligo(dT) and gene specific primers. PCR products were separated on an agarose gel and  
1070 stained with EtBr. Minus RT reactions produced no signal. **C.** Venn diagram showing the overlap  
1071 between the two sets of increased RNAs and read-through RNAs in *cut14-208*. **D.** Steady state level of  
1072 Rrp6. Indicated strains were grown at 36°C for 2.5 hours, total proteins were extracted and probed  
1073 with an anti-myc antibody. Alpha-tubulin served as loading control.

1074

1075 **Figure S3 – related to Figure 4. Condensin binds to budding yeast chromosomes throughout the cell**  
1076 **cycle and is released by TEV cleavage of its kleisin subunit.**

1077 **A.** Cells were synchronized to G1 phase by α-factor and released (strains C1 and C1584). Samples for  
1078 chromosome spreads were taken prior to the release, 0.5 and 1 h after the release in order to yield  
1079 G1, S and G2 phase samples, as indicated. Cell cycle synchronization was scored by FACScan analysis  
1080 of cellular DNA content. **B.** Condensin levels on chromosomes of cells in **A** were measured by  
1081 immunofluorescence of chromosome spreads (red, anti-HA; blue DAPI). Scale bar: 5 μm. **C.** Cells were  
1082 synchronized to G1 phase by α-factor (strains C1 and C1597) and released as in **A**. Samples for ChIP  
1083 were taken prior to the release, or 0.5 or 1 h after the release for G1, S and G2 phase samples,  
1084 respectively. Condensin levels on chromosomes were measured by anti-PK ChIP at the rDNA locus  
1085 followed by quantitative PCR. **D.** TEV protease expression was induced by addition of galactose (+ gal)  
1086 in cells synchronized in G1 phase by α-factor (strains C1039 and C2455). A control sample was not  
1087 induced (– gal). Condensin levels on chromosomes were measured by anti-HA ChIP followed by  
1088 quantitative PCR at the rDNA locus.

1089

1090 **Supplemental Figure S4 – related to Figure 5. Defective mitosis underlies deregulated gene**  
1091 **expression in the fission yeast *cut14-208* condensin mutant**

1092 **A-C.** Gene expression was assessed in synchronized *cut14-208* cells progressing through mitosis. **A.**  
1093 Cells expressing the analogue-sensitive Cdc2asM17 kinase were arrested at the G2/M transition in the  
1094 presence of 3-Br-PP1 (2 μM), shifted at 36°C, released into mitosis and re-arrested in late G1 phase by  
1095 the *cdc10-129* mutation. **B.** DNA content was assessed by FACScan analysis and mitotic progression by  
1096 cytological observation. DNA was stained with DAPI and the septum with calcofluor. The frequencies  
1097 of chromatin bridges (red line) and chromosome cutting by the septum (green line) are shown. **C.** Total

1098 RNA extracted from wild-type and *cut14-208* cells shown in **B** was reverse-transcribed in the presence  
1099 or absence of RT and cDNA quantified by qPCR.

1100

1101 **Supplemental Figure S5 - related to Figure 5. Defective mitosis underlies deregulated gene**  
1102 **expression in the fission yeast *cut14-208* condensin mutant**

1103 **A-B.** The amplitude of increase in RNA levels correlates with the prevalence of chromosome severing.  
1104 Indicated cells were grown at 36°C for 2.5 hours and processed for cytological analysis of chromosome  
1105 segregation or RT-qPCR. **A.** Cells were fixed and processed for immunofluorescence against  $\alpha$ -tubulin.  
1106 DNA was stained with DAPI. Chromosome segregation was assessed in anaphase cells exhibiting a  
1107 mitotic spindle  $\geq 6 \mu\text{m}$  in length ( $n \geq 100$ ). CUT phenotype (chromosome severing by the septum) was  
1108 assessed by staining DNA with Hoechst 3342 and the septum by calcofluor ( $n \geq 100$ ). Shown are  
1109 averages  $\pm$  SDs from biological triplicates. **B.** Total RNA extracted from cells grown at 36°C was reverse-  
1110 transcribed in the presence or absence of RT and the cDNA quantified by qPCR. Shown are the averages  
1111  $\pm$  SDs measured from biological triplicates. **C.** Venn diagram of 3-extended RNA detected by strand  
1112 specific RNA-seq in indicated strains. **D.** RNAseq profiles of the *hsp9* gene showing the suppressive  
1113 effect of *cdc15-140* on the accumulation of read-through transcripts caused by *cut14-208*. **E.** Increased  
1114 RNA levels persist in the double mutant *cdc15-140 rrp6 $\Delta$* . Cells were grown at 36°C for 2.5 hours, total  
1115 RNA was reverse-transcribed in the presence or absence of RT and cDNA quantified by qPCR. Shown  
1116 are the averages  $\pm$  SDs measured from biological triplicates. **F.** The mutations *cdc12-112* that prevents  
1117 cytokinesis at the restrictive temperature restored normal RNA levels in a *cut14-208* genetic  
1118 background. Cells were grown at 36°C for 2.5 hours, total RNA was reverse-transcribed in the presence  
1119 or absence of RT and cDNA quantified by qPCR. Shown are the averages  $\pm$  SDs measured from biological  
1120 duplicates.

1121

1122 **Supplemental Figure S6 – related to Figure 6. Condensin inactivation generates anucleolate daughter**  
1123 **cells in fission yeast, which are depleted of the RNases Rrp6 and Dis3 and accumulate unstable RNA**

1124 **A.** *cut14-208* mutant cells accumulate DNA damage that can be suppressed by *cdc15-140*. Cells  
1125 expressing Rad22-GFP were grown at 36°C for 2.5 hours, fixed and stained with DAPI. Cells exhibiting  
1126 at least one Rad22-GFP focus were scored. Shown are the averages  $\pm$  SDs calculated from biological  
1127 triplicates with more than 100 cells per experiment. **B.** DNA damage does not increase RNA levels as  
1128 *cut14-208*. Cells expressing Rad22-GFP were synchronised in prometaphase by the *nda3-KM311*  
1129 mutation and released in mitosis in the presence of Camptothecin (CPT), or its vehicle DMSO, to induce  
1130 DNA damage upon mitotic exit. Asynchronously growing cells expressing Rad22-GFP were treated with

1131 zeocin to induce DNA double-strand breaks. The prevalence of DNA damage was measured by scoring  
1132 Rad22-GFP foci. RNA levels in cells experiencing DNA damage were assessed by RT-qPCR. Shown are  
1133 averages  $\pm$  SDs calculated from biological triplicates. **C.** The *cdc15-140* mutation prevents the  
1134 production of anucleolate cells in a *cut14-208* genetic background. Cells expressing Gar2-GFP were  
1135 grown at 36°C for 2.5 hours, fixed and stained with DAPI to score the percentage of anucleolate cells.  
1136 Shown are the averages  $\pm$  SDs calculated from biological triplicates with more than 100 cells per  
1137 experiment. **D.** Dis3 is enriched in the nucleolus and segregates asymmetrically in *cut14-208* mutant  
1138 cells (arrow). Indicated cells were grown at 36°C, fixed with ethanol and processed for  
1139 immunofluorescence against Dis3-HA. DNA was stained with DAPI. Right panel shows the ratio of Dis3-  
1140 HA signals measured within daughter nuclei in septated cells. \*\*\* indicates that the difference is  
1141 statistically significant with  $p < 0.001$  by the Chi-square test.

1142

# Hocquet Fig. 1

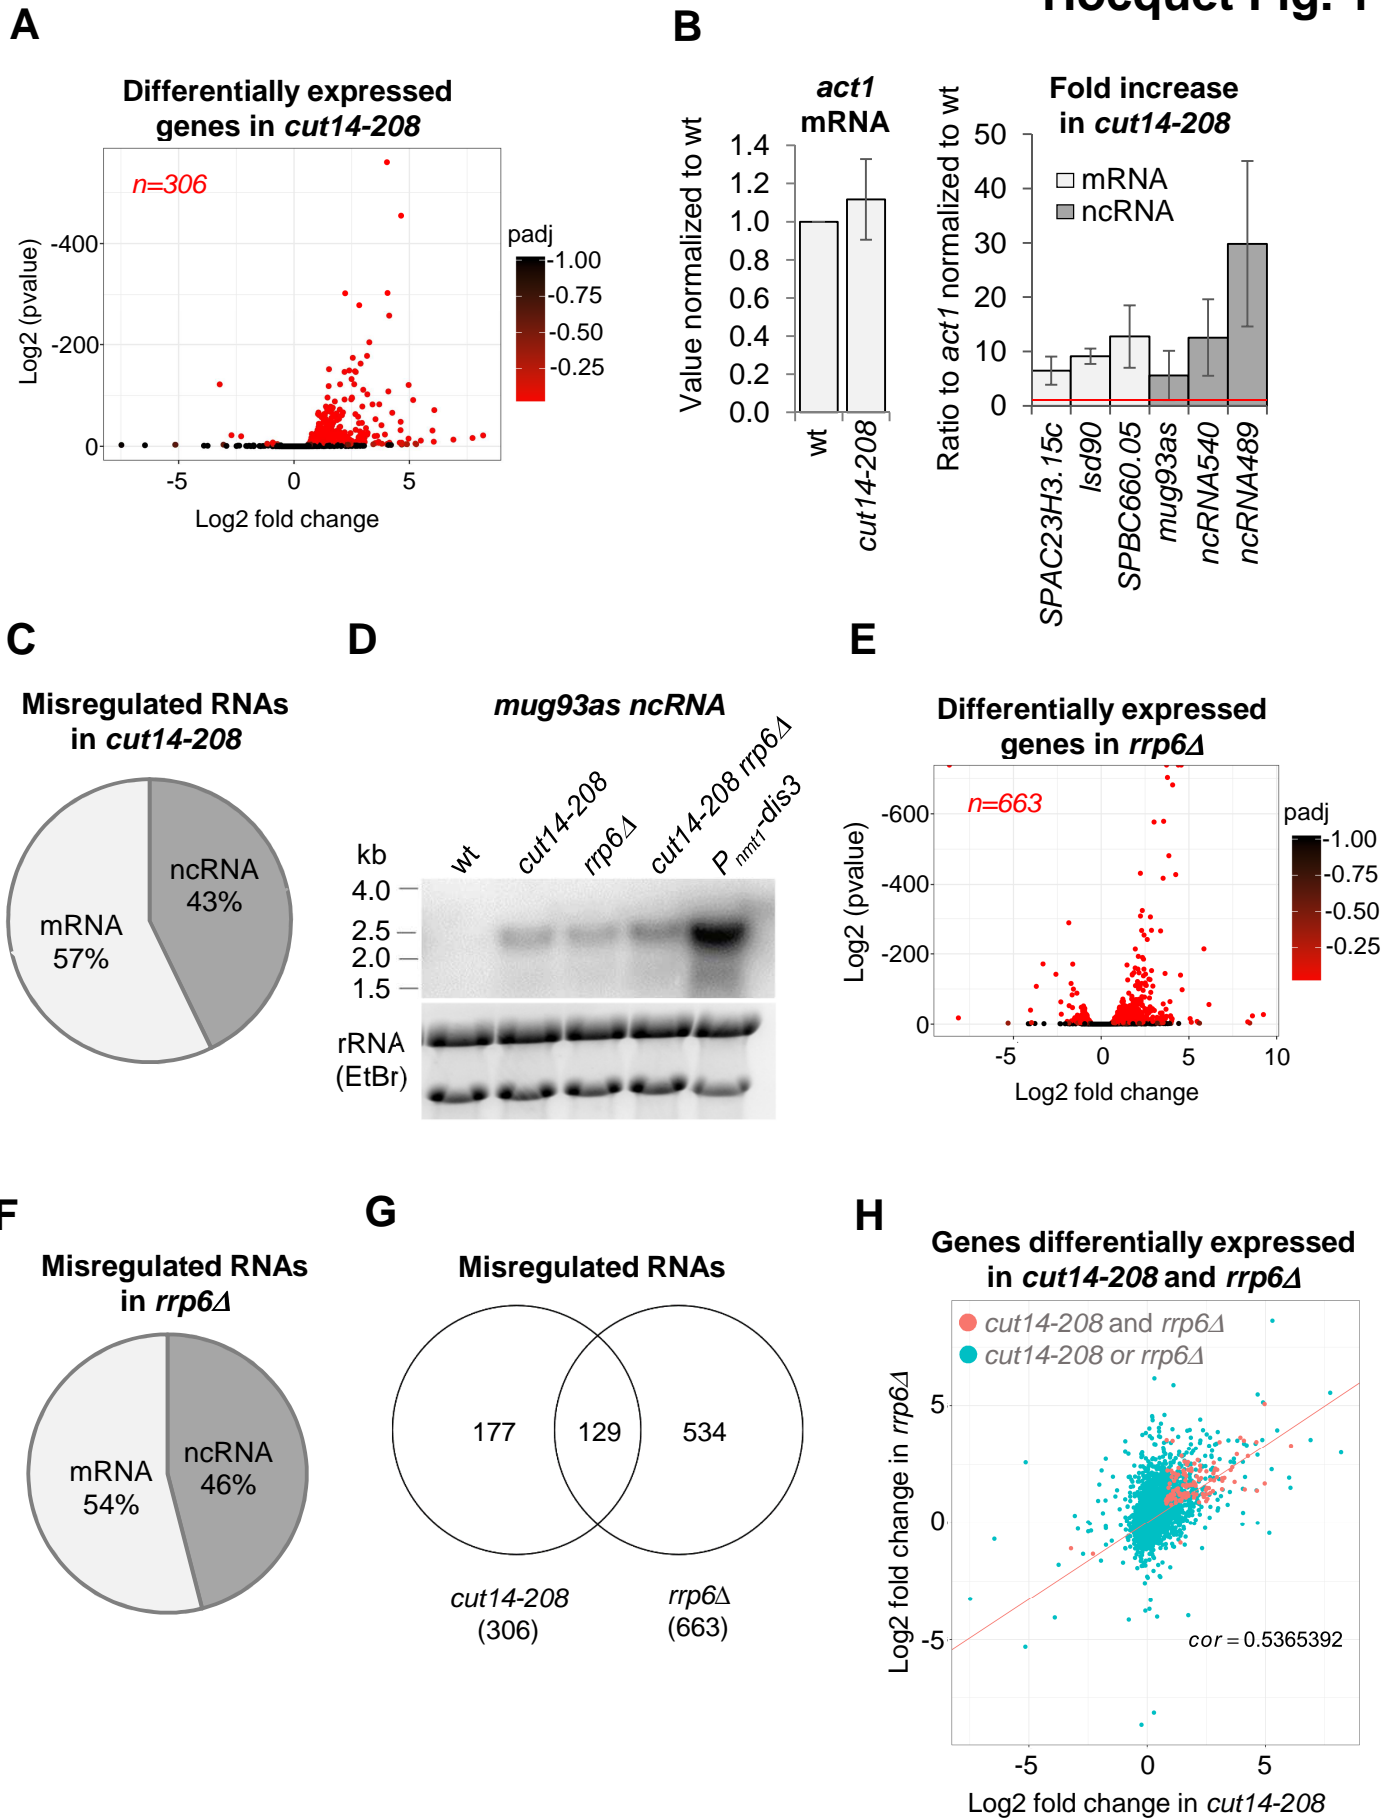

Hocquet et al. Fig.2

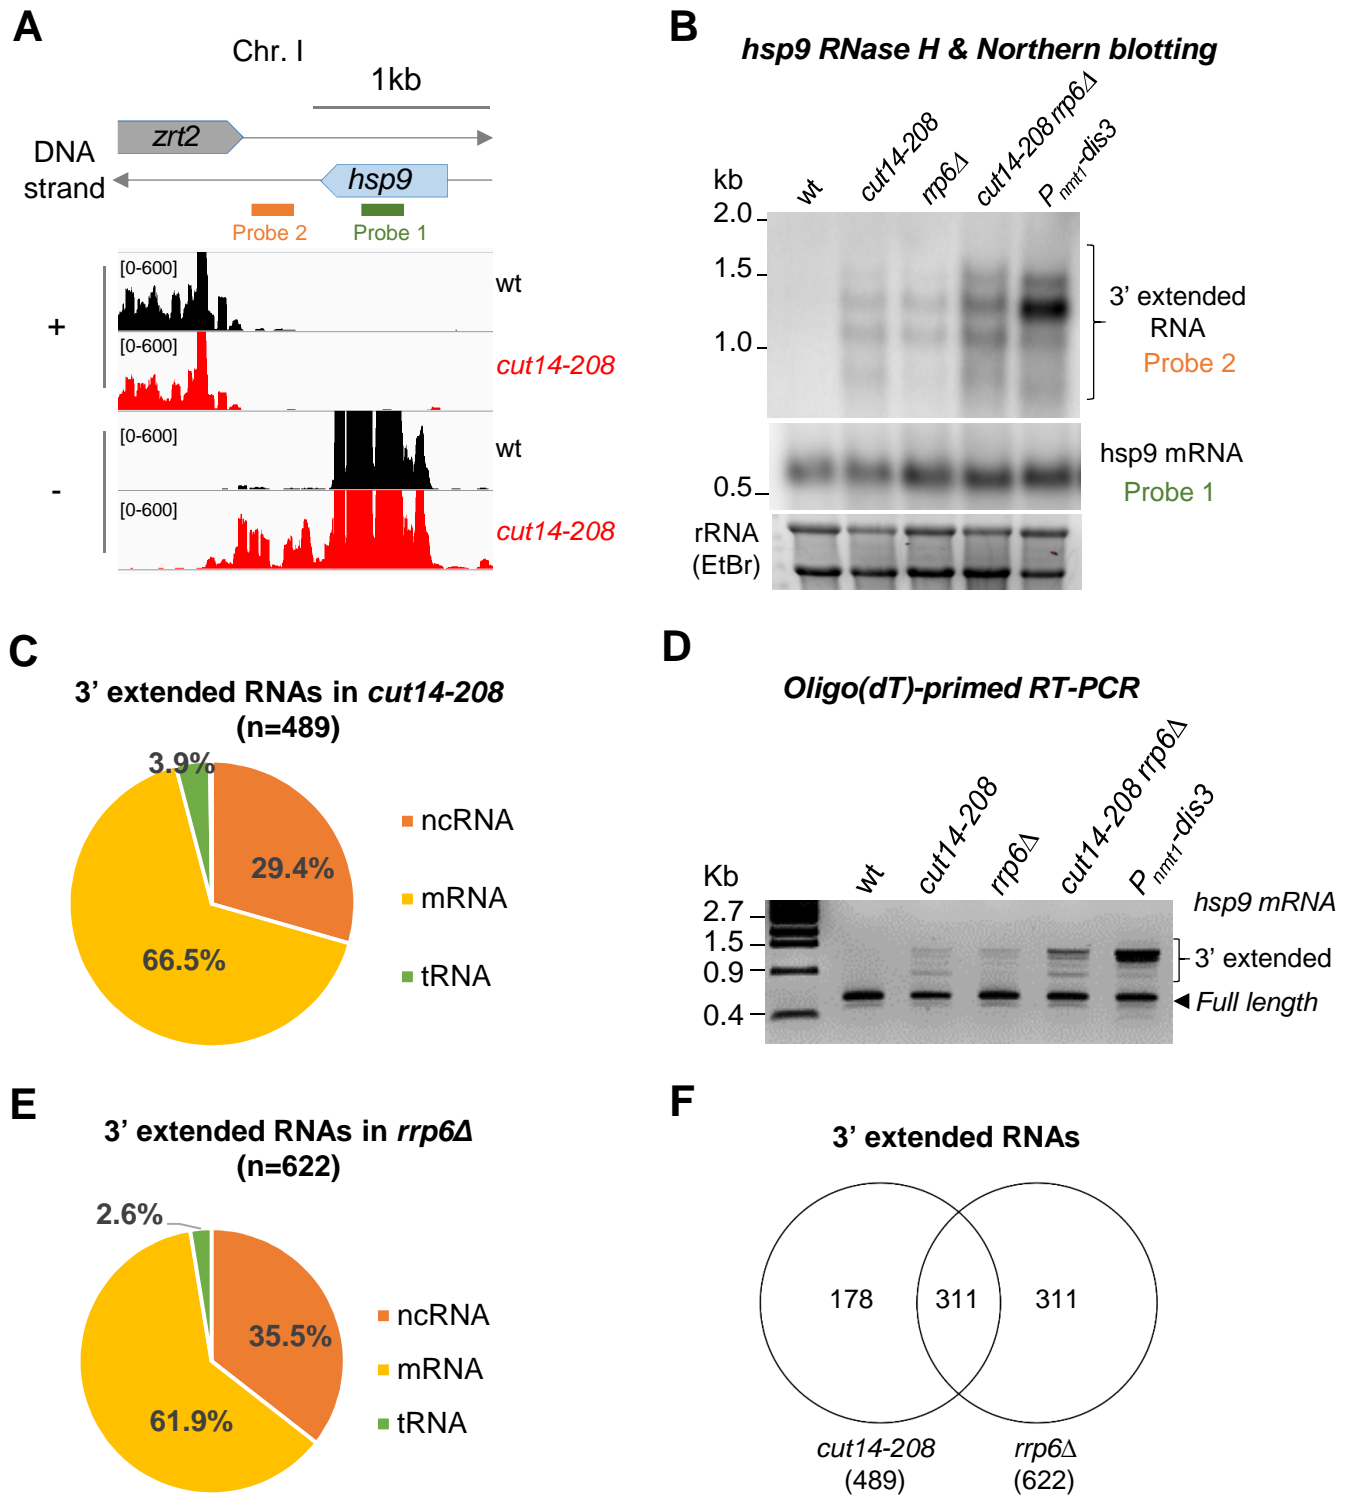

Hocquet et al. Fig.3

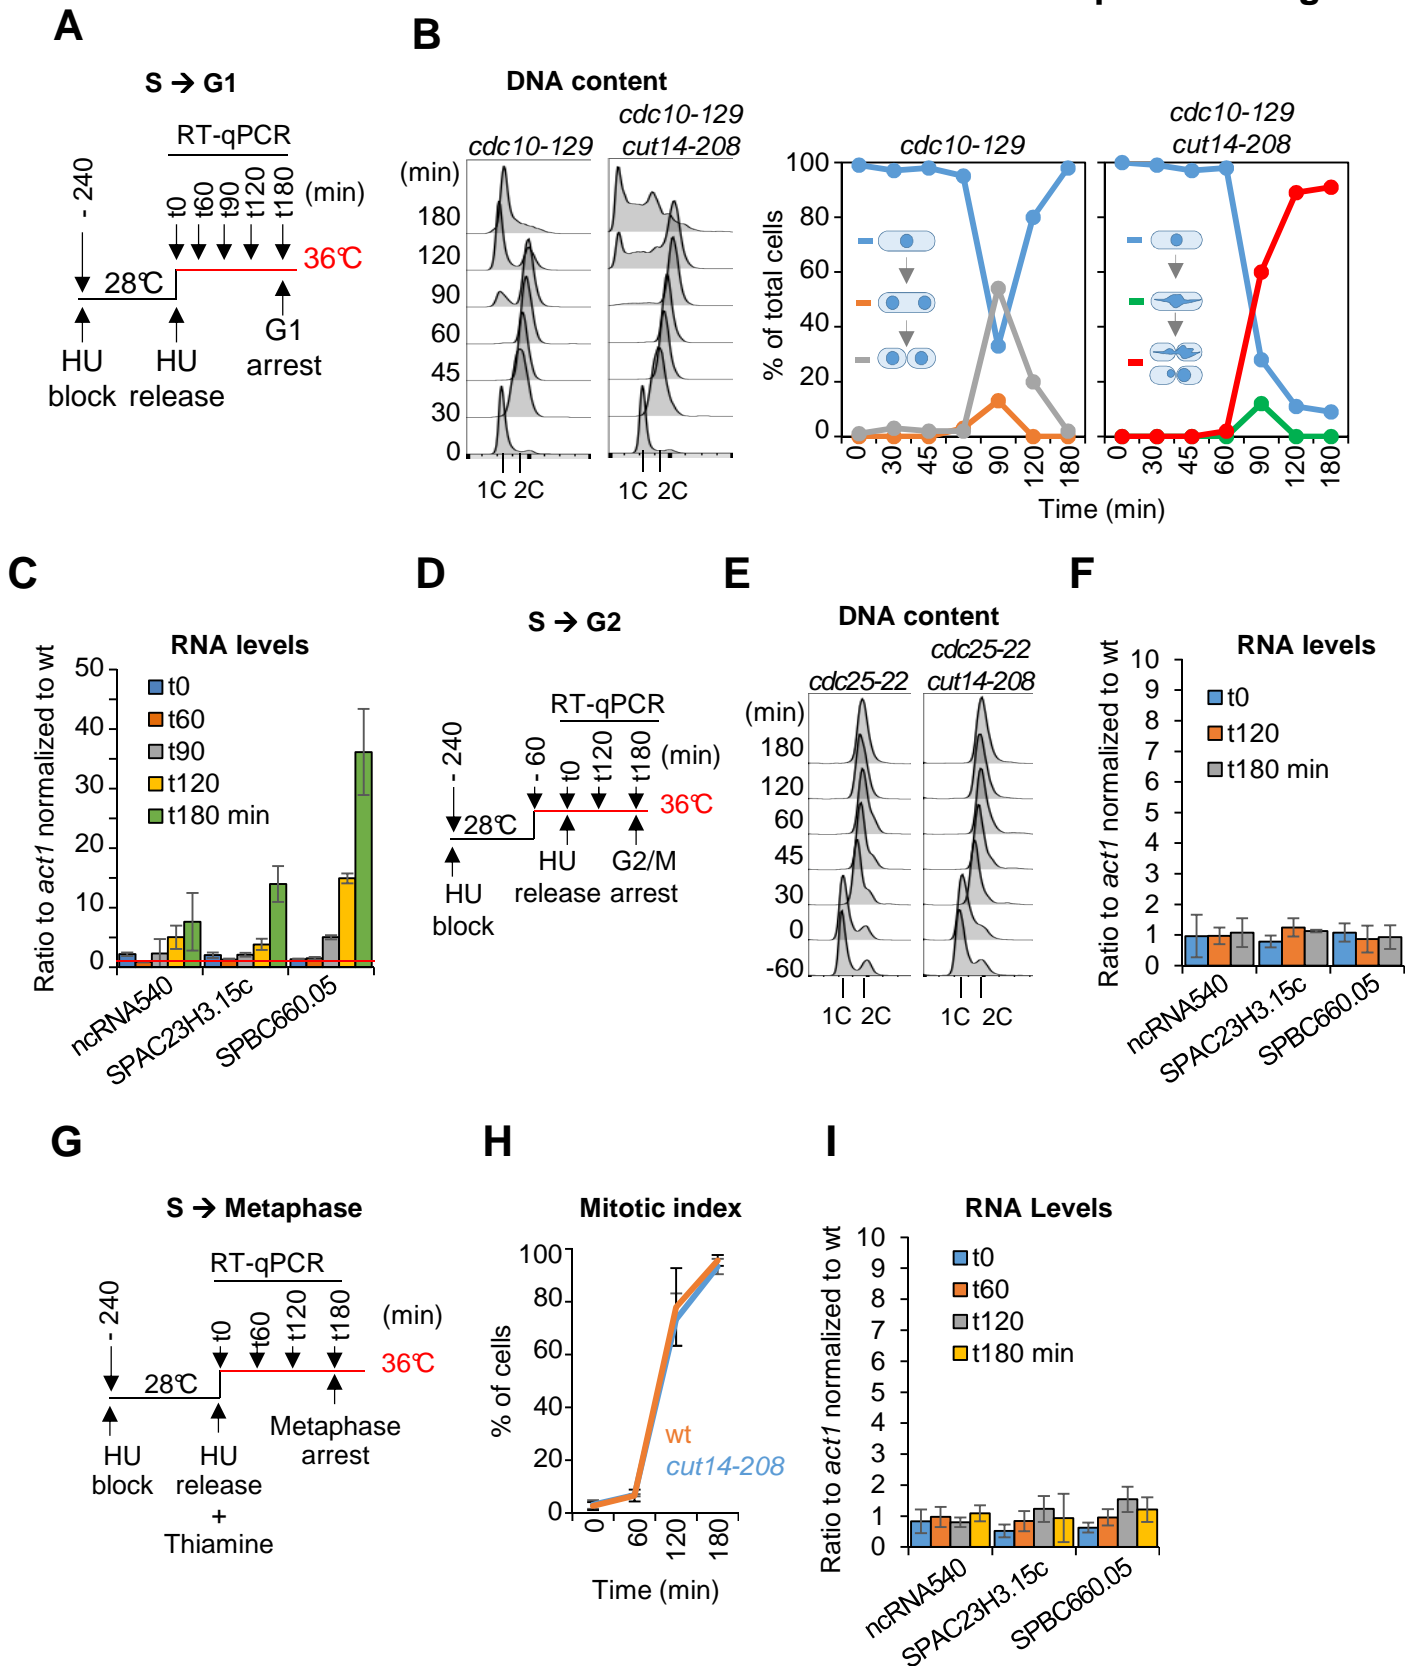



Hocquet et al. Fig.4

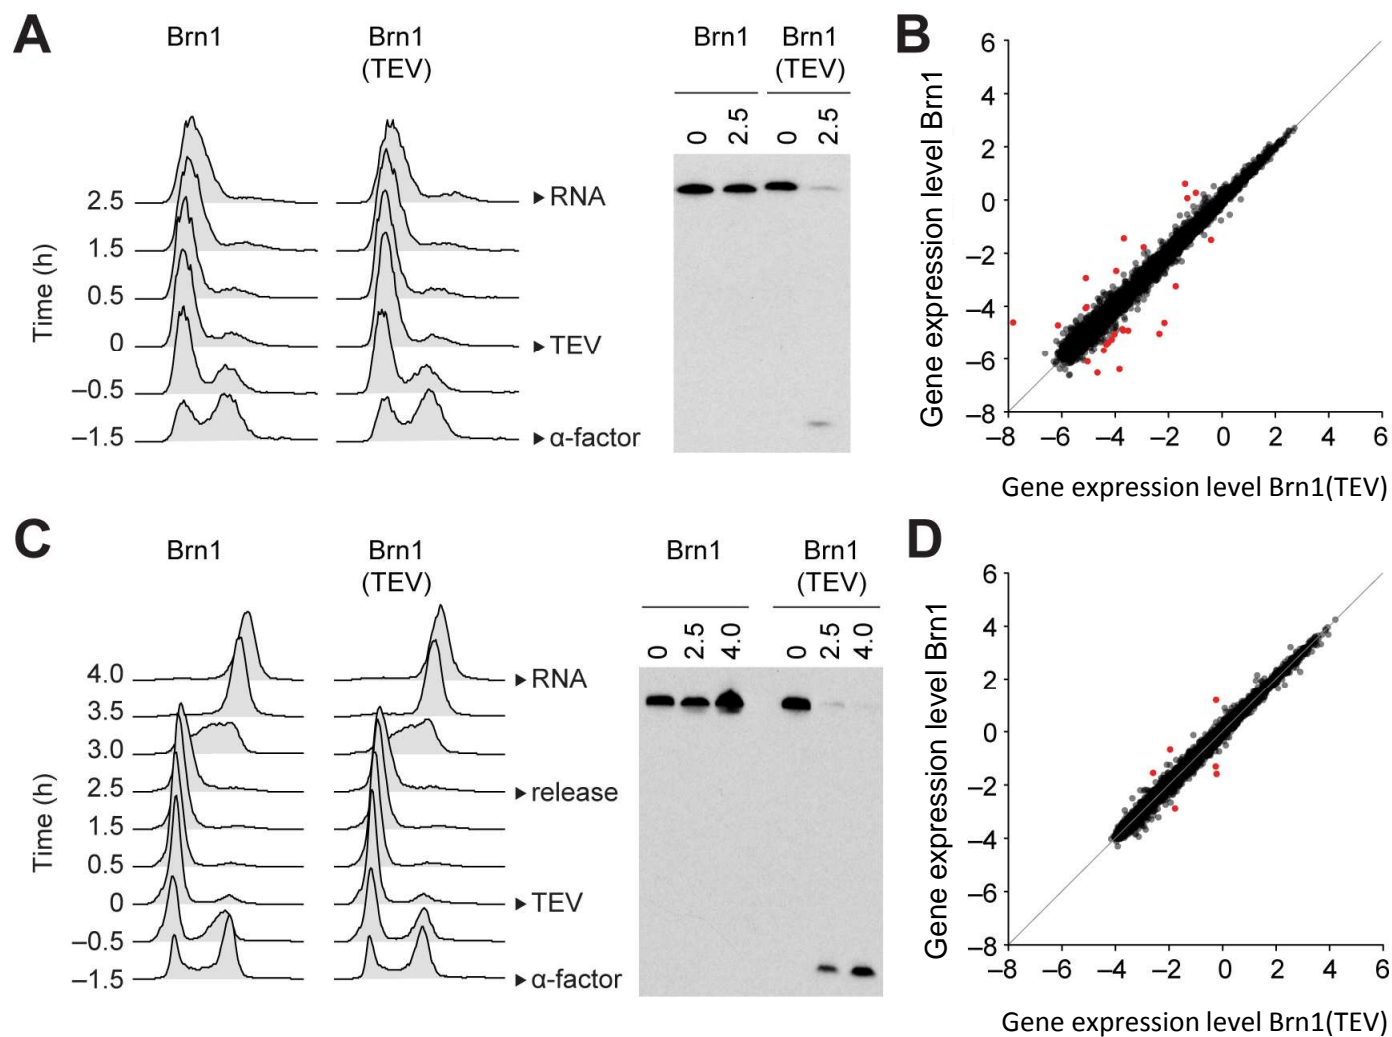

Hocquet et al. Fig.5

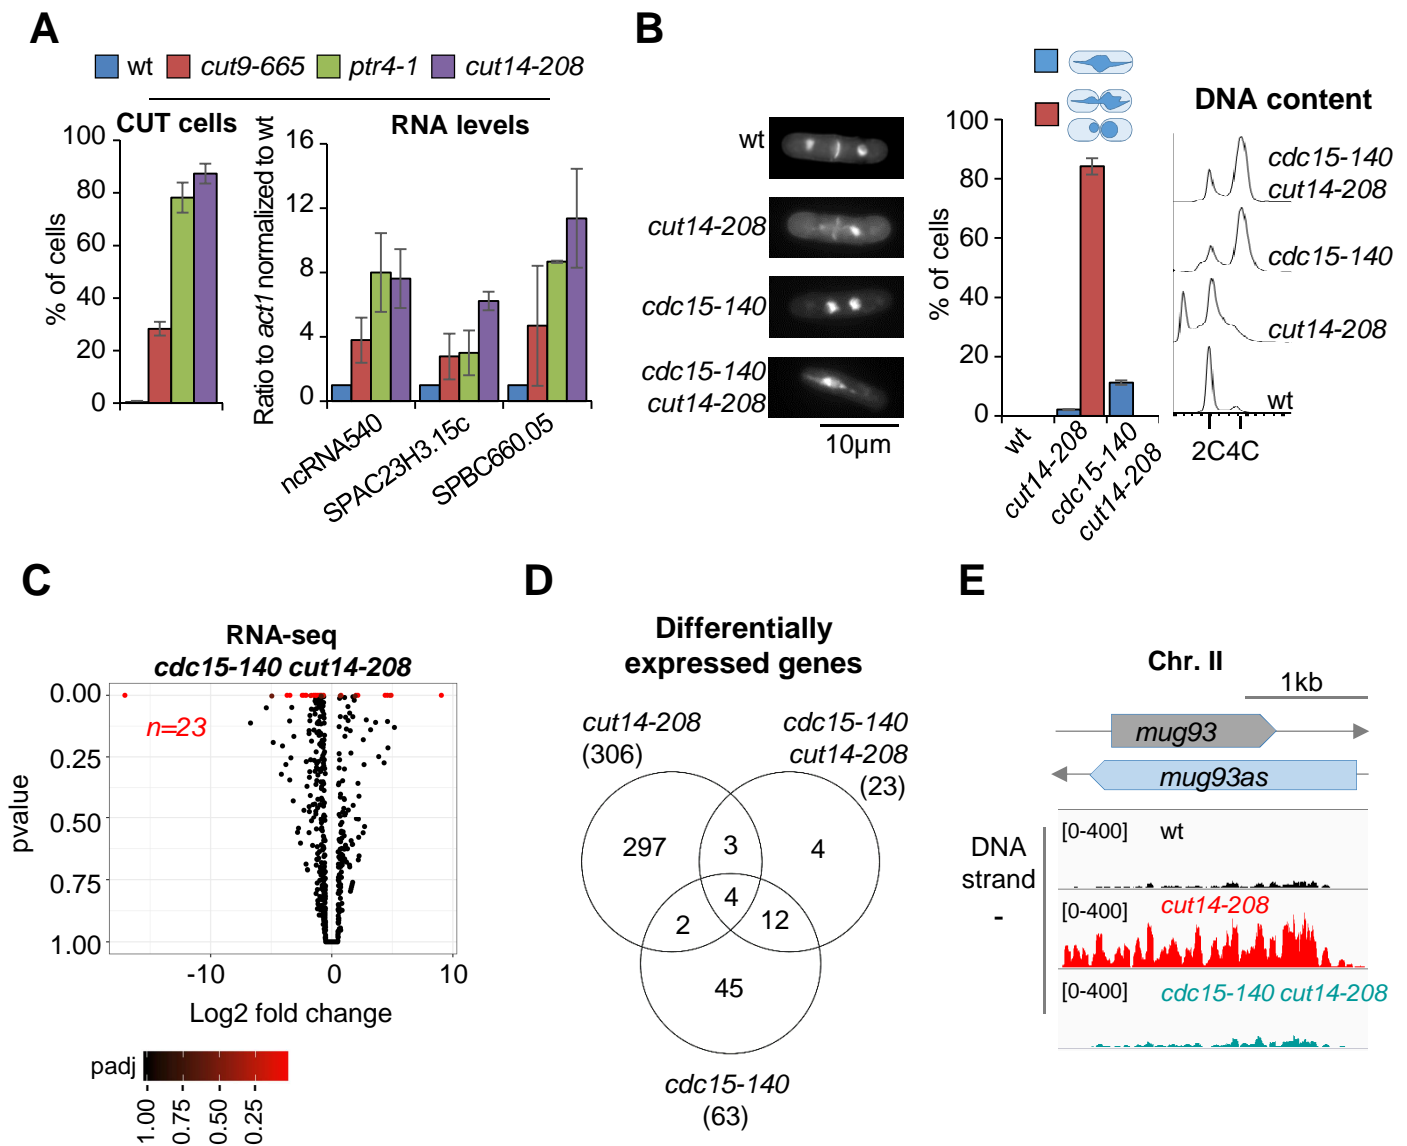

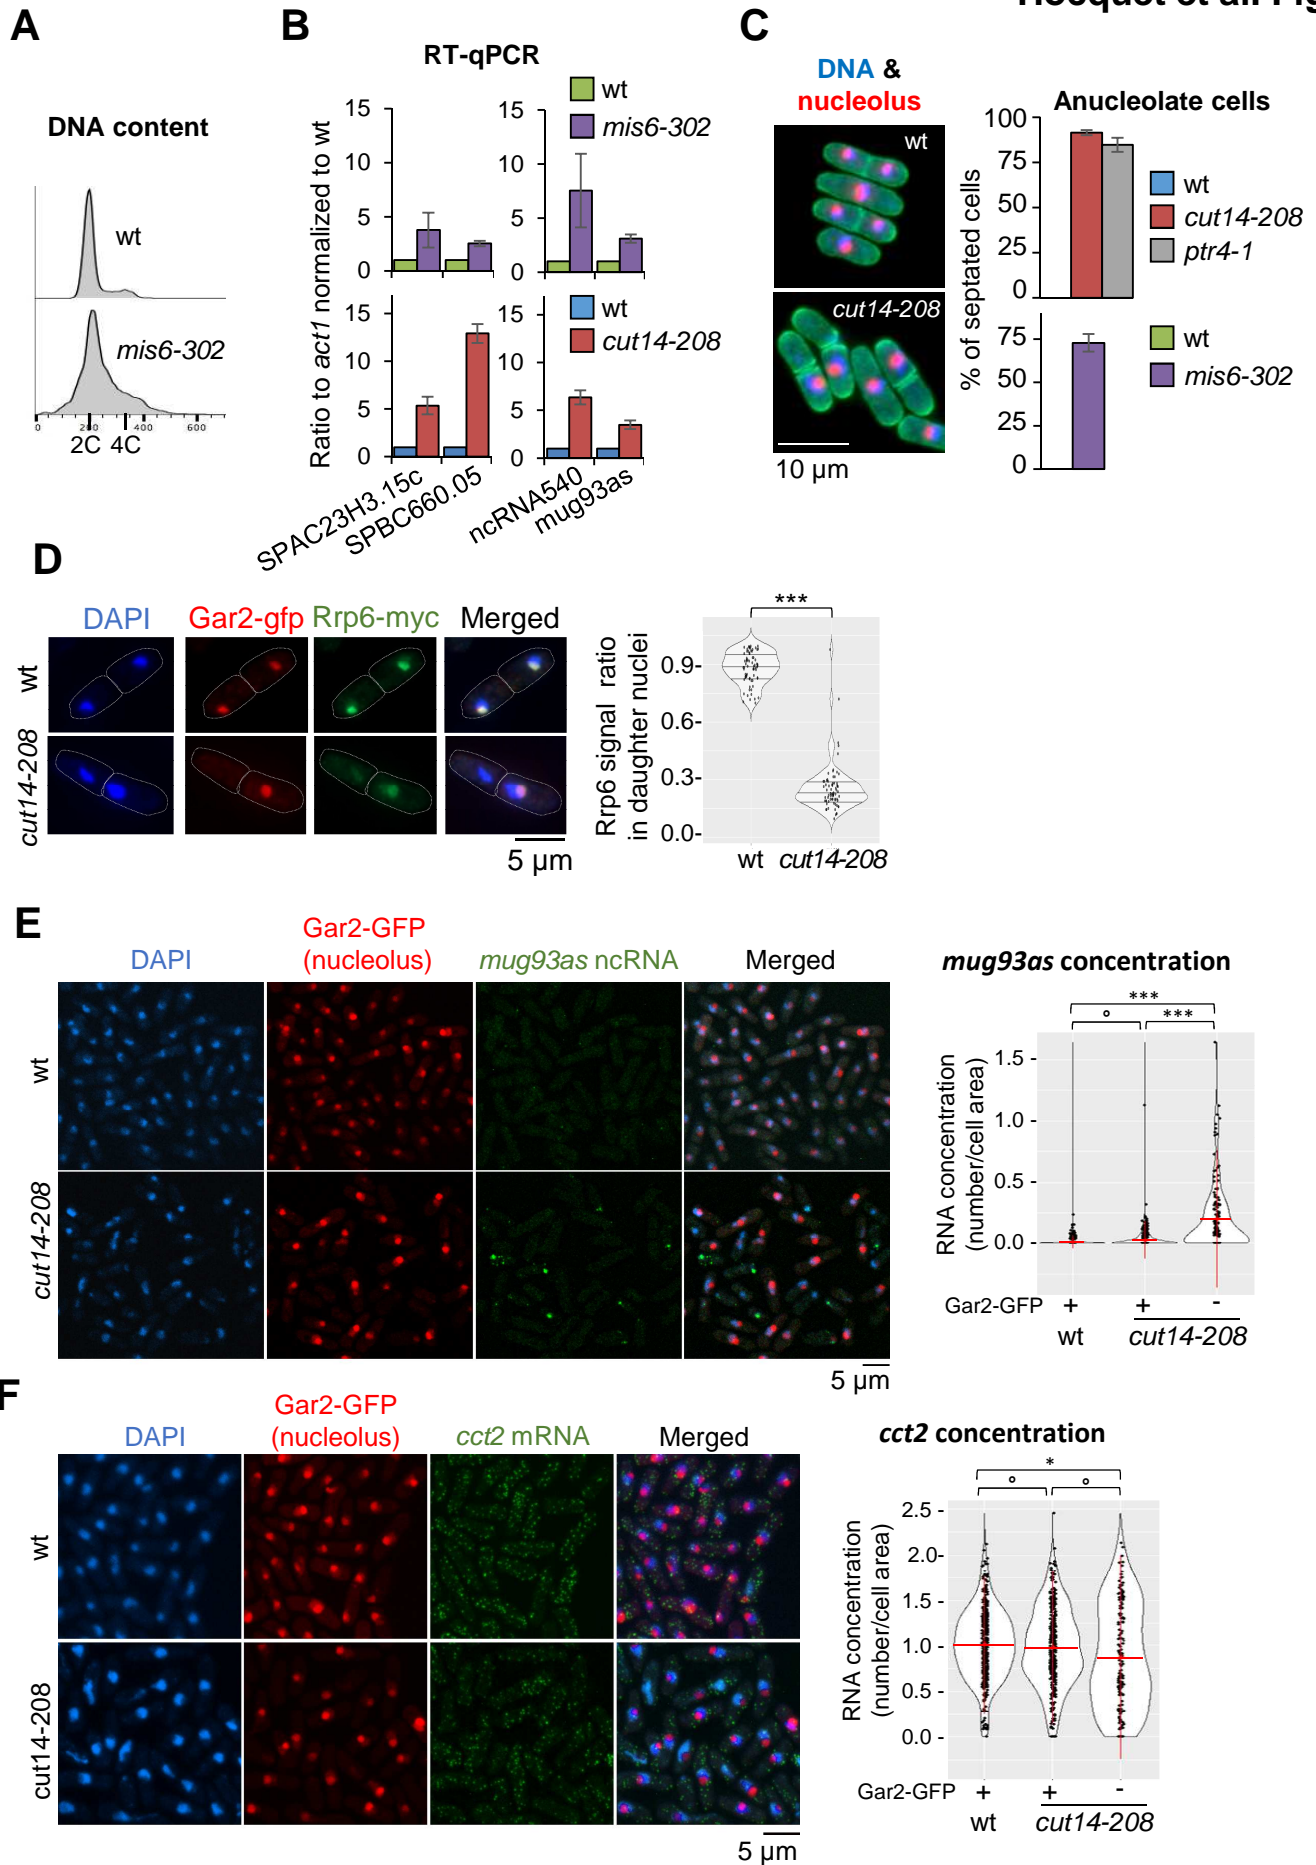

## Hocquet et al. Fig.7

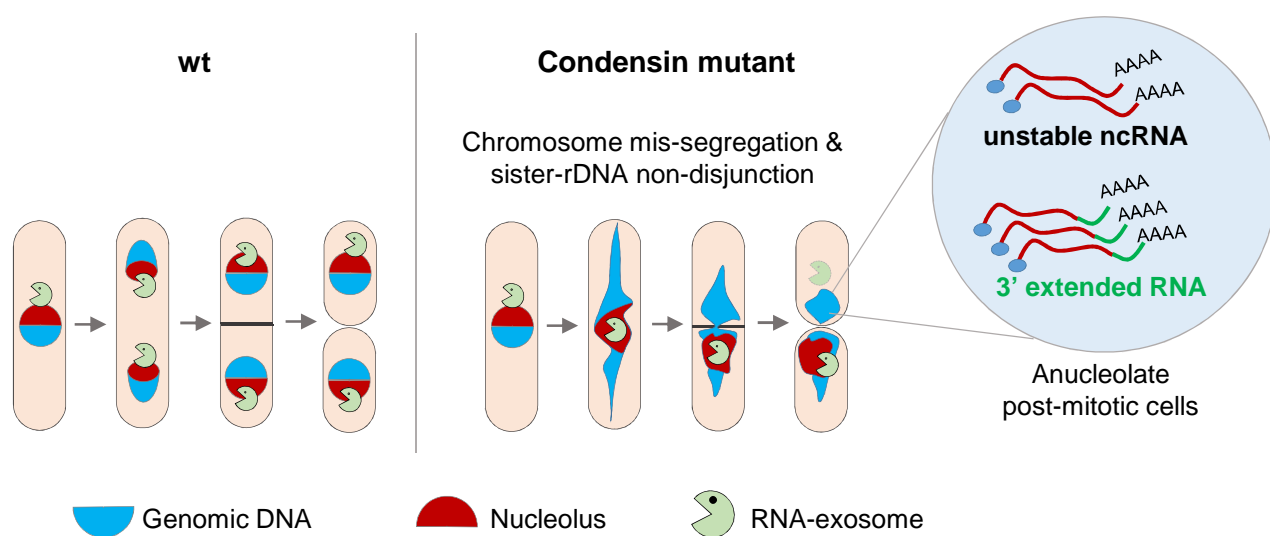

Hocquet et al. Fig. S1

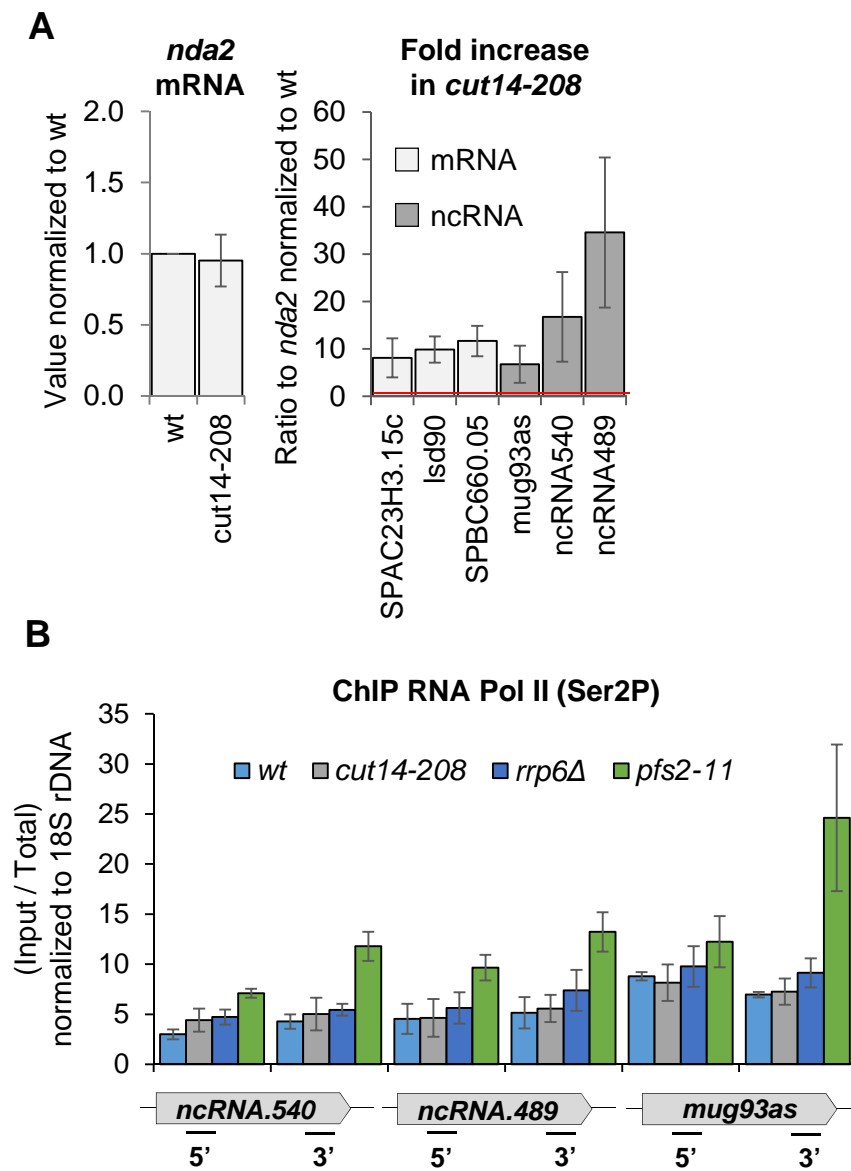

## Hocquet et al. Fig.S2

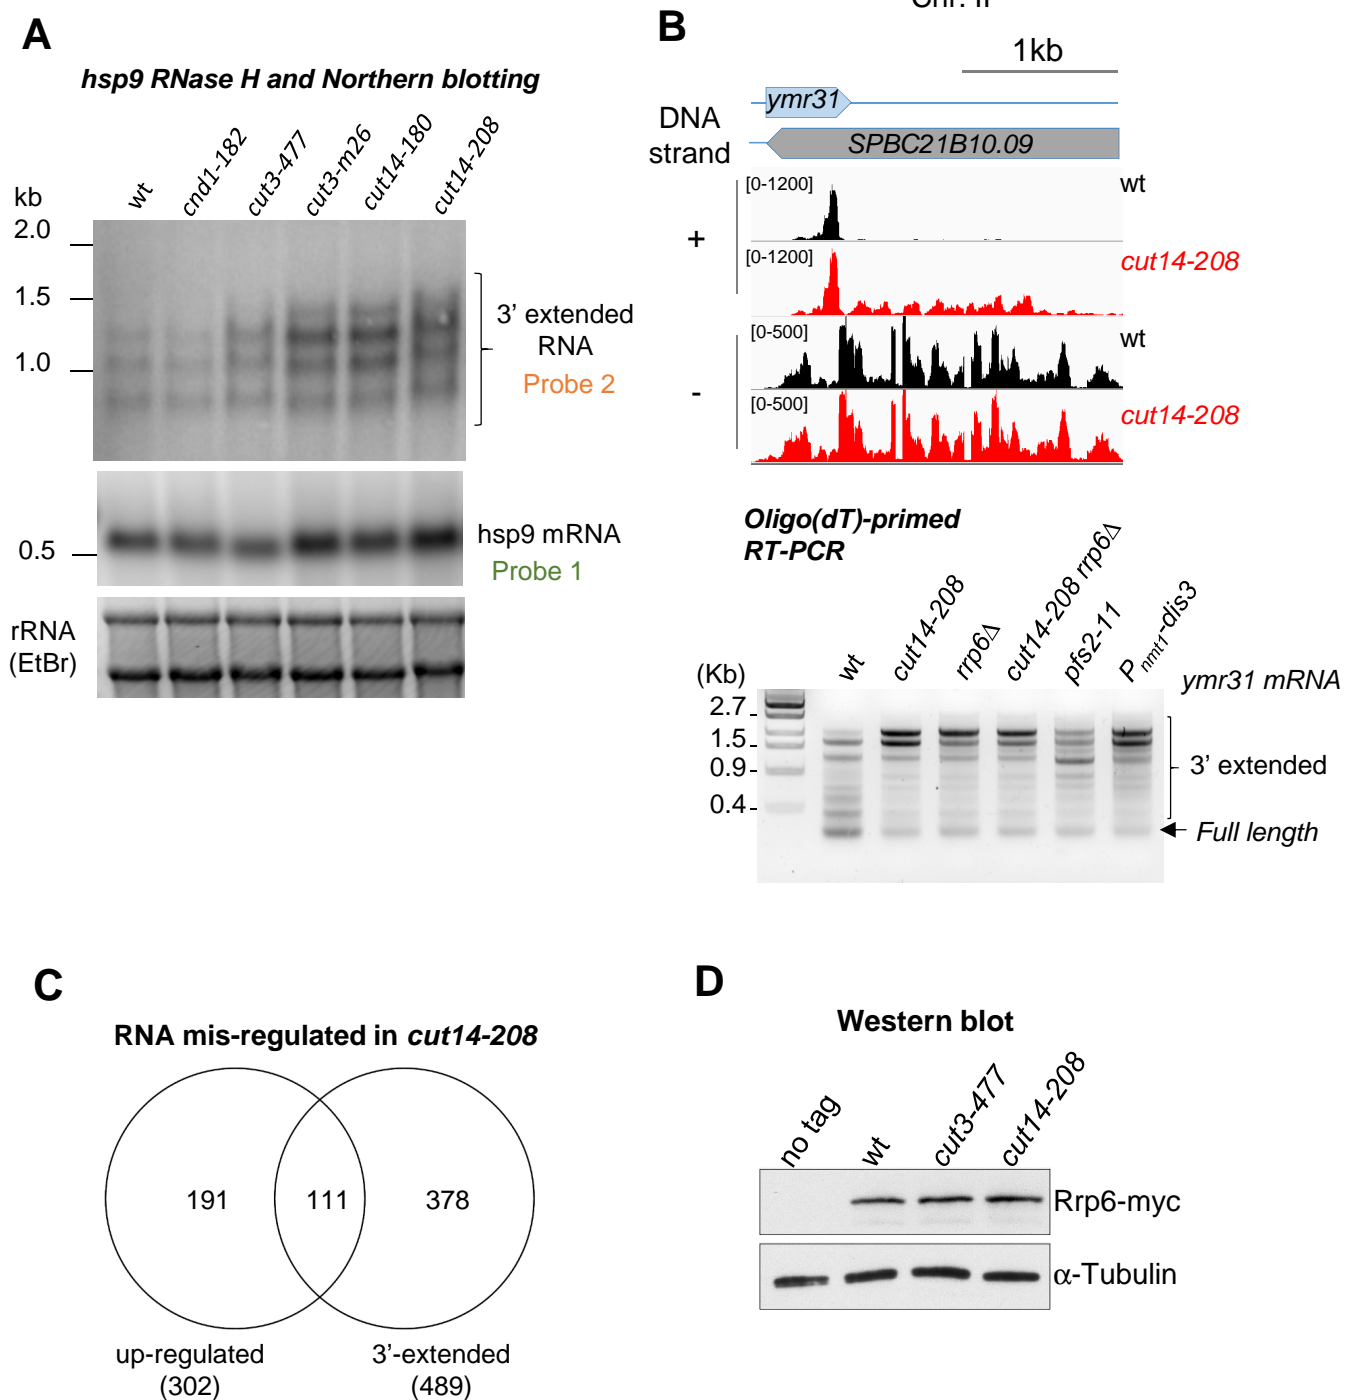

Hocquet et al. Fig.S3

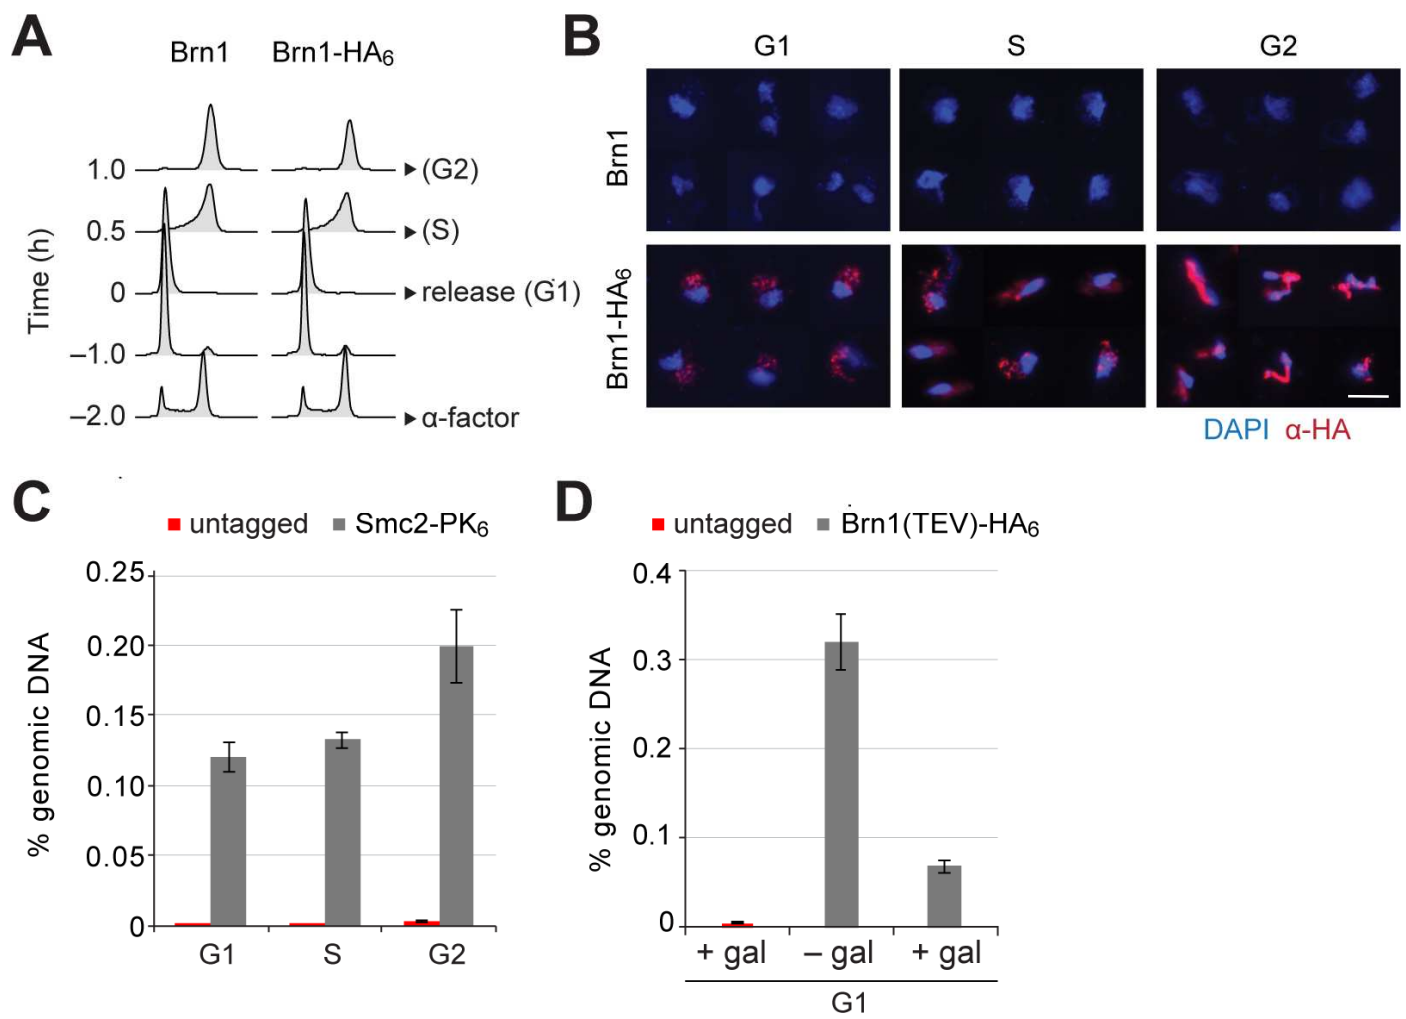

Hocquet et al. Fig.S4

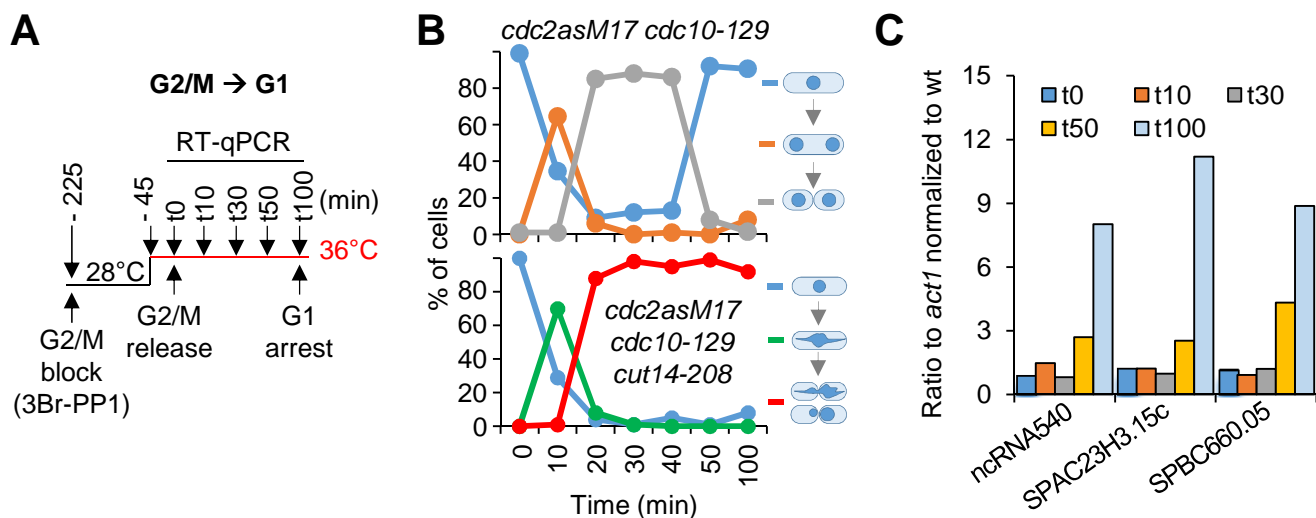



Hocquet et al. Fig.S5

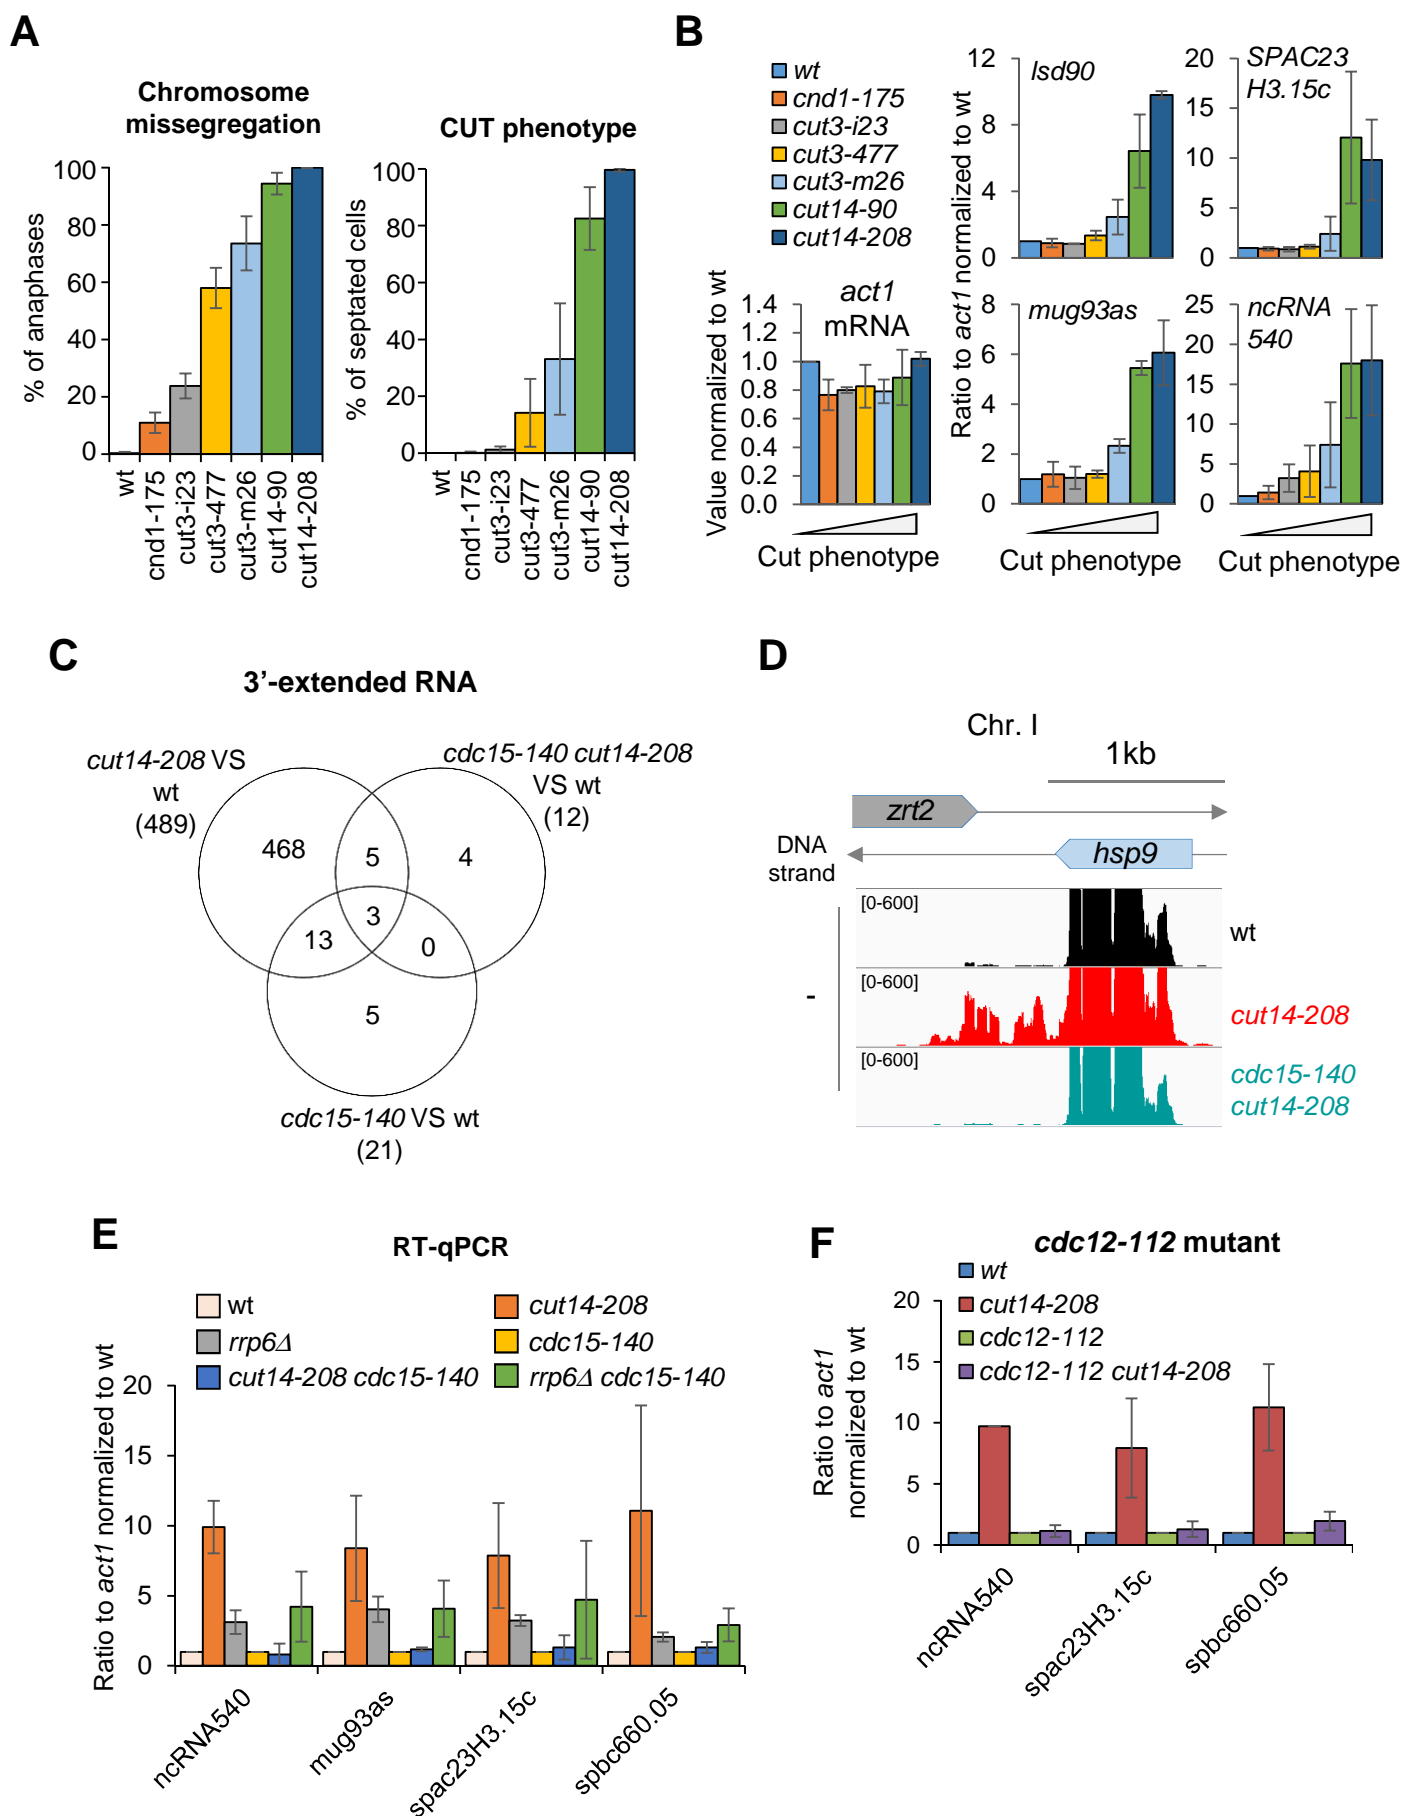

**A**

**Hocquet et al. Fig.S6**

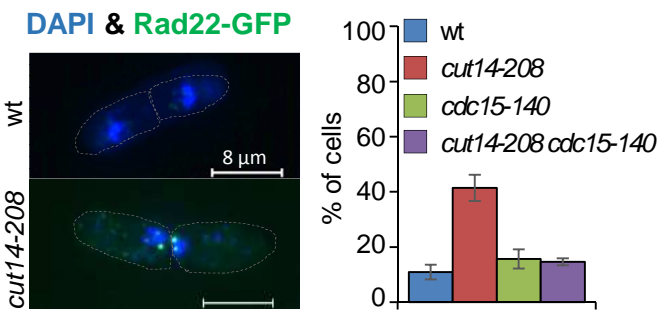

**B**

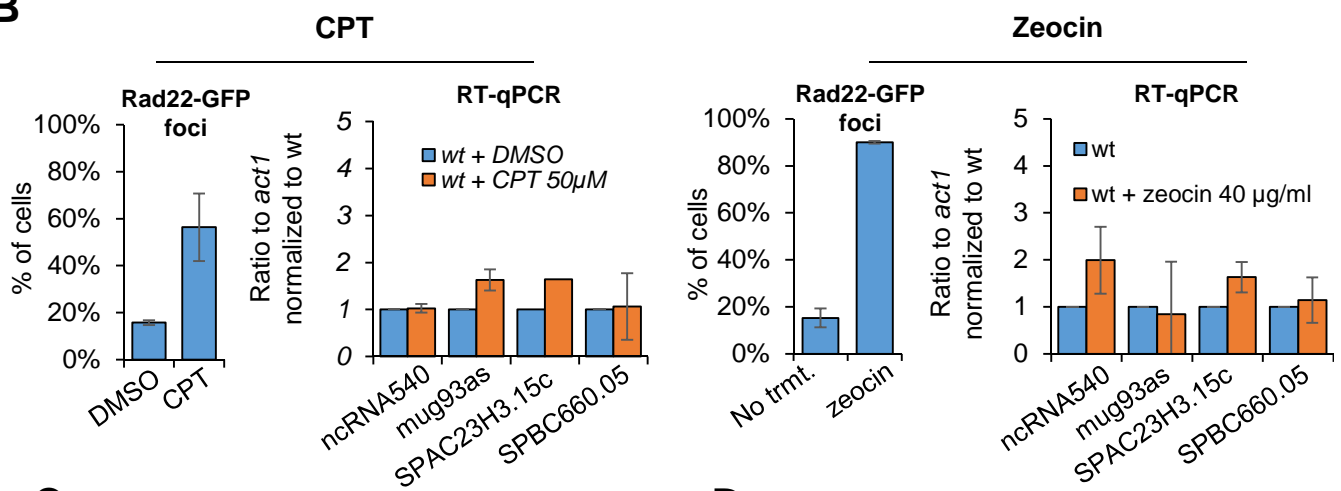

**C**

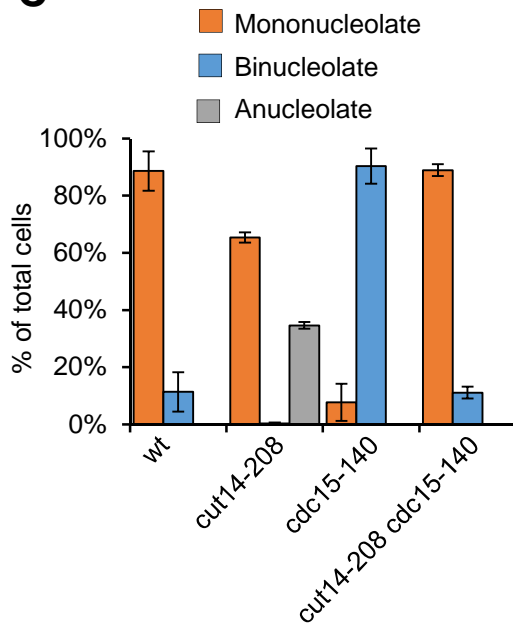

**D**

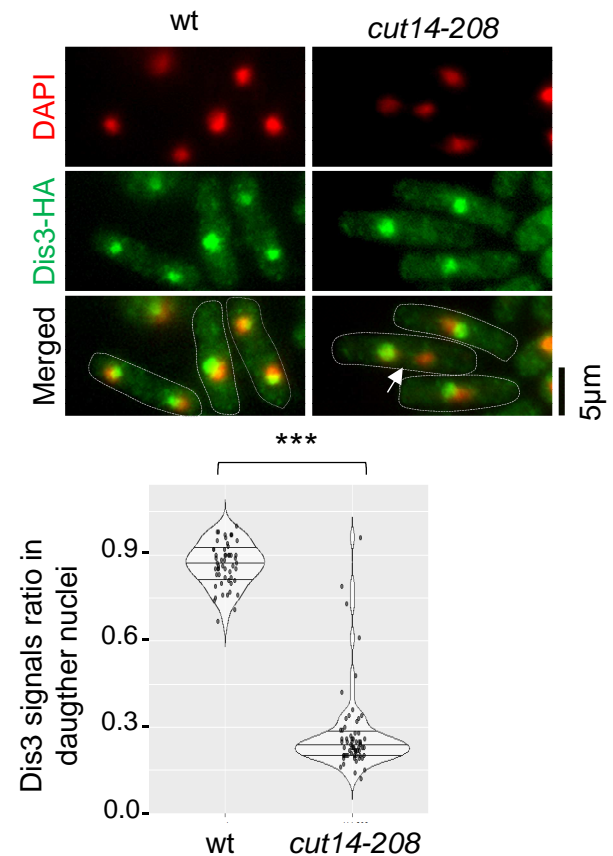

**Supplemental Table S1. RNA levels of RNA-exosome and TRAMP components in *cut14-208* mutant cells**

| Protein      | Systematic gene name | Protein Complex | <i>cut14-208</i> vs wt |          |
|--------------|----------------------|-----------------|------------------------|----------|
|              |                      |                 | P value adj            | Log2FC   |
| Rrp6         | SPAC1F3.01           | RNA-exosome     | 1                      | -0,24371 |
| Dis3         | SPBC26H8.10          | RNA-exosome     | 1                      | -0,13197 |
| Rrp41        | SPAC3G9.10c          | RNA-exosome     | 1                      | -0,23751 |
| Rrp43        | SPBC17D1.03c         | RNA-exosome     | 1                      | -0,10895 |
| Cti1/Rrp47   | SPCC1739.07          | RNA-exosome     | 1                      | 0,00185  |
| Csl4         | SPCC1840.11          | RNA-exosome     | 1                      | -0,13319 |
| Rrp4         | SPAC2F7.14c          | RNA-exosome     | 1                      | -0,18844 |
| Rrp40        | SPAC22A12.12c        | RNA-exosome     | 1                      | 0,02820  |
| Rrp46        | SPBC115.01c          | RNA-exosome     | 1                      | -0,16979 |
| Mtr3         | SPBC211.08c          | RNA-exosome     | 1                      | 0,03692  |
| Rrp42        | SPBC16G5.10          | RNA-exosome     | 1                      | -0,01230 |
| Rrp45        | SPCC757.08           | RNA-exosome     | 1                      | -0,09132 |
| cid14        | SPAC12G12.13c        | TRAMP           | 1                      | -0,17385 |
| Air1         | SPBP35G2.08c         | TRAMP           | 1                      | -0,32050 |
| Mtr4         | SPAC6F12.16c         | TRAMP           | 1                      | -0,02359 |
| RNA helicase | SPAC17H9.02          | TRAMP           | 1                      | -0,22135 |

**Supplemental Table S2. Yeast strains used in this study**

\* fission yeast strains (LY); leu- : leu1-32 ; ura- : ura4D18 or DS/E ; ade- : ade6-210 or -216 ; lys- : lys1-131 ; his- : his3D1

| Figure    | strain number |                                                          | Genotype*                                                                                 | Origin                            |
|-----------|---------------|----------------------------------------------------------|-------------------------------------------------------------------------------------------|-----------------------------------|
| Fig. 1, 2 | LY113         | h-                                                       | leu- ura- ade-                                                                            | our stock                         |
|           | LY140         | h-                                                       | leu- ura- cut14-208                                                                       | our stock                         |
|           | LY979         | h-                                                       | leu- ura- ade- rrp6Δ::KanR                                                                | Jean-Paul Javerzat                |
|           | LY2403        | h-                                                       | leu- ura- cut14-208 rrp6Δ::KanR                                                           | this study                        |
|           | LY3966        | h-                                                       | leu- ura- ade- his- P81nmt1-dis3::KanR                                                    | François Bachand                  |
| Fig. 3    | LY1238        | h-                                                       | leu- ura- cdc10-129                                                                       | YGRC                              |
|           | LY4675        | h+                                                       | ura- cdc10-129 cut14-208                                                                  | this study                        |
|           | LY4476        | h-                                                       | leu- ura- cdc25-22 cdc13-GFP-LEU2                                                         | this study                        |
|           | LY4478        | h-                                                       | leu- ura- cdc25-22 cdc13-GFP-LEU2 cut14-208                                               | this study                        |
|           | LY4067        | h-                                                       | leu- ade- P41nmt1-slp1::KanR cn2-GFP-LEU2                                                 | this study (slp1 from C. Haering) |
| LY4070    | h-            | leu- ade- his- P41nmt1-slp1::KanR cn2-GFP-LEU2 cut14-208 | this study                                                                                |                                   |
| Fig. 4    | C2335         | MAT <sub>a</sub>                                         | leu- brn1::HIS3 ura3::BRN1-HA6::URA3 pGAL-NLS-myc9-TEVprotease-NLS2::TRP1                 | our stock                         |
|           | C2455         | MAT <sub>a</sub>                                         | leu- brn1::HIS3 ura3::BRN1(3X1EV6Z2)-HA6::URA3 trp1::pGAL-NLS-myc9-TEVprotease-NLS2::TRP1 | our stock                         |
|           | C3138         | MAT <sub>a</sub>                                         | NLS2::TRP1                                                                                | this study                        |
|           | C3139         | MAT <sub>a</sub>                                         | TEVprotease-NLS2::TRP1                                                                    | this study                        |
| Fig. 5    | LY113         | h-                                                       | leu- ura- ade-                                                                            | our stock                         |
|           | LY140         | h-                                                       | leu- ura- cut14-208                                                                       | our stock                         |
|           | LY4669        | h+                                                       | leu- ura- cdc15-140                                                                       | this study                        |
|           | LY4672        | h-                                                       | leu- ura- cdc15-140 cut14-208                                                             | this study                        |
|           | LY4632        | h-                                                       | leu- cut9-665                                                                             | YGRC                              |
| LY4699    | h-            | leu- ptr4-1                                              | YGRC                                                                                      |                                   |
| Fig. 6    | LY113         | h-                                                       | leu- ura- ade-                                                                            | our stock                         |
|           | LY140         | h-                                                       | leu- ura- cut14-208                                                                       | our stock                         |
|           | LY4706        | h-                                                       | leu- ura- mis6-302                                                                        | YGRC                              |
|           | LY4924        | h+                                                       | leu- ura- gar2-mcherry::KanR ade6<<GFP-Psy1                                               | this study (gar2-mcherry YGRC)    |
|           | LY4925        | h-                                                       | leu- ura- gar2-mcherry ade6<<GFP-Psy1 cut14-208                                           | this study (gar2-mcherry YGRC)    |
|           | LY5001        | h+                                                       | leu- ura- gar2-mcherry::KanR ade6<<GFP-Psy1 ptr4-1                                        | this study (gar2-mcherry YGRC)    |
|           | LY5248        | h-                                                       | leu- ura- gar2-mcherry::KanR ade6<<GFP-Psy1 mis6-302                                      | this study (gar2-mcherry YGRC)    |
|           | LY5332        | h-                                                       | leu- ura- ade- rrp6-13-MYC:HygroR gar2-GFP::KanR nda3-KM-311                              | this study                        |
|           | LY5334        | h-                                                       | leu- ura- ade- rrp6-13-MYC:HygroR gar2-GFP::KanR cut14-208 nda3-KM-311                    | this study                        |
|           | LY4021        | h+                                                       | leu- ura- ade- rrp6-13-MYC:HygroR                                                         | this study                        |
| LY4026    | h+            | leu- ura- rrp6-13-MYC:HygroR nda3-KM-311 cut14-208       | this study                                                                                |                                   |
| Fig. S1   | LY5404        | h+                                                       | leu- ura- gar2-GFP::KanR                                                                  | this study                        |
|           | LY5405        | h-                                                       | leu- ura- gar2-GFP::KanR cut14-208                                                        | this study                        |
|           | LY113         | h-                                                       | leu- ura- ade-                                                                            | our stock                         |
|           | LY140         | h-                                                       | leu- ura- cut14-208                                                                       | our stock                         |

|         |        |                  |                     |                                                                                      |                                |
|---------|--------|------------------|---------------------|--------------------------------------------------------------------------------------|--------------------------------|
|         | LY979  | h-               | leu- ura- ade-      | rrp6Δ::KanR                                                                          | Jean-Paul Javerzat             |
|         | LY1155 | h-               |                     | pfs2-11                                                                              | Chris Norbury                  |
| Fig. S2 | LY113  | h-               | leu- ura- ade-      |                                                                                      | our stock                      |
|         | LY1266 | h-               | leu- ura- ade-      | cnd1-182                                                                             | our stock                      |
|         | LY1069 | h-               | leu- ura-           | cut3-477                                                                             | our stock                      |
|         | LY3185 | h-               | leu- ura-           | cut3-m26                                                                             | Christian Haering              |
|         | LY1252 | h-               | leu- ura- ade-      | cut14-180                                                                            | our stock                      |
|         | LY140  | h-               | leu- ura-           | cut14-208                                                                            | our stock                      |
|         | LY979  | h-               | leu- ura- ade-      | rrp6Δ::KanR                                                                          | Jean-Paul Javerzat             |
|         | LY2403 | h-               | leu- ura-           | cut14-208 rrp6Δ::KanR                                                                | this study                     |
|         | LY1155 | h-               |                     | pfs2-11                                                                              | Chris Norbury                  |
|         | LY3966 | h-               | leu- ura- ade- his- | P81nmt1-dis3::KanR                                                                   | François Bachand               |
|         | LY4021 | h+               | leu- ura- ade-      | rrp6-13-MYC:HygroR                                                                   | this study                     |
|         | LY4025 | h+               | leu- ura- ade-      | rrp6-13-MYC:HygroR cut3-477                                                          | this study                     |
|         | LY4026 | h+               | leu- ura-           | rrp6-13-MYC:HygroR nda3-KM-311 cut14-208                                             | this study                     |
| Fig. S3 | C1     | MAT <sub>a</sub> | leu- ura- his- trp- | wild-type                                                                            | Kim Nasmyth                    |
|         | C1039  | MAT <sub>a</sub> | leu- ura- his-      | pGAL-NLS-myc9-TEVprotease-NLS2::TRP1                                                 | Kim Nasmyth                    |
|         | C1584  | MAT <sub>a</sub> | leu- ura- trp-      | BRN1-HA6::HIS3                                                                       | Kim Nasmyth                    |
|         | C1597  | MAT <sub>a</sub> | leu- ura- his- trp- | SMC2-PK6::KanR                                                                       | Kim Nasmyth                    |
|         | C2455  | MAT <sub>a</sub> | leu-                | brn1::HIS3 ura3::BRN1(3xTEV622)-HA6::URA3 trp1::pGAL-NLS-myc9-TEVprotease-NLS2::TRP1 | our stock                      |
| Fig. S4 | LY4764 | h-               | leu- ura-           | cdc2-as-M17 cdc10-129                                                                | this study                     |
|         | LY4766 | h-               | leu- ura-           | cdc2-as-M17 cdc10-129 cut14-208                                                      | this study                     |
| Fig. S5 | LY113  | h-               | leu- ura- ade-      |                                                                                      | our stock                      |
|         | LY1069 | h-               | leu- ura-           | cut3-477                                                                             | our stock                      |
|         | LY3185 | h-               | leu- ura-           | cut3-m26                                                                             | Christian Haering              |
|         | LY1261 | h+               | leu- ura- ade-      | cnd1-175                                                                             | our stock                      |
|         | LY3186 | h-               | leu- ura-           | cut3-i23                                                                             | Christian Haering              |
|         | LY725  | h-               | leu- ura- ade-      | cut14-90                                                                             | our stock                      |
|         | LY140  | h-               | leu- ura-           | cut14-208                                                                            | our stock                      |
|         | LY4669 | h+               | leu- ura-           | cdc15-140                                                                            | this study                     |
|         | LY4672 | h-               | leu- ura-           | cdc15-140 cut14-208                                                                  | this study                     |
|         | LY979  | h-               | leu- ura- ade-      | rrp6Δ::KanR                                                                          | Jean-Paul Javerzat             |
|         | LY5222 | h-               | leu- ura- ade-      | rrp6Δ::KanR cdc15-140                                                                | this study                     |
|         | LY4727 | h+               | leu- ura- ade-      | cdc12-112                                                                            | this study                     |
|         | LY4857 | h-               | leu- ura-           | cdc12-112 cut14-208                                                                  | this study                     |
| Fig. S6 | LY4944 | h+               | leu- ura-           | rad22-GFP                                                                            | our stock                      |
|         | LY4949 |                  | leu- ura-           | rad22-GFP cut14-208                                                                  | this study                     |
|         | LY4951 |                  | leu- ura-           | rad22-GFP cdc15-140                                                                  | this study                     |
|         | LY4953 |                  | leu- ura-           | rad22-GFP cdc15-140 cut14-208                                                        | this study                     |
|         | LY5118 | h-               | leu- ura-           | rad22-GFP nda3-KM-311                                                                | this study                     |
|         | LY4924 | h+               | leu- ura-           | gar2-mcherry::KanR ade6<<GFP-Psy1                                                    | this study (gar2-mcherry YGRC) |

|        |    |           |                                                 |                                |
|--------|----|-----------|-------------------------------------------------|--------------------------------|
| LY4925 | h- | leu- ura- | gar2-mcherry ade6<<GFP-Psy1 cut14-208           | this study (gar2-mcherry YGRC) |
| LY5003 | h+ | leu- ura- | gar2-mcherry ade6<<GFP-Psy1 cdc15-140           | this study                     |
| LY5023 | h+ | leu- ura- | gar2-mcherry ade6<<GFP-Psy1 cdc15-140 cut14-208 | this study                     |
| LY2266 | h- | ura-      | dis3-HA:KanR                                    | Jean-Paul Javerzat             |
| LY2859 | h- | ura-      | dis3-HA:KanR cut14-208                          | this study                     |

Appendix Tables S3 : Primers and RNA-FISH probes used in this study

| primer       | Left                   | Right                   | experiment    |
|--------------|------------------------|-------------------------|---------------|
| ncRNA.540 5' | TTGCAGTAATGCTCACGGTAG  | GTTGTGAAAACCTCTCCGTCTCC | ChIP, RT-qPCR |
| ncRNA.540 3' | GAGAAAAGATGGGGAAACTGC  | GAAGACGGCAGAATGGAAAG    | ChIP          |
| ncRNA.489 5' | TTTATCTGGATGGGGTTTATCG | GTGACTCGTATGCCAGAAGAAG  | ChIP          |
| ncRNA.489 3' | GCCTTTTGTTCCTTCTATGC   | TGCTTGATGTTTCGGCCTAC    | ChIP, RT-qPCR |
| mug93as 5'   | AACGGCAGTATTGGTGTGC    | CGGATACACCAAGCAATGAAG   | ChIP, RT-qPCR |
| mug93as 3'   | TCCACCAAGTTTACGTTCTCC  | TCCACCAAGTTTACGTTCTCC   | ChIP          |
| act1         | GAATGGATCCACCAATCCAG   | CCGATCGTATGCAAAAGGAG    | RT-qPCR       |
| nda2         | GCGTCCAACCTATGAAAACC   | CCAGCAAATCGAAGAGAAGC    | RT-qPCR       |
| lsd90        | TTCTTCGGATAGCGACAAGG   | ATACCAAGGCATGACGAAC     | RT-qPCR       |
| spac23h3.15c | GTTACAGCGGTGAGGGATATG  | TGCAGTTGTACGAGCATTACG   | RT-qPCR       |
| spbc660.05   | TCCAGGCTTGCATATTCCTC   | AAGAACACTGCCGGCTAAAG    | RT-qPCR       |
| rDNA         | TTTCTGCCTTTTTCGGTGAC   | TGGCATGGATTTCCCTTTAG    | qPCR          |
| cct2_1       | TTGGATGCCACTTTCGTTAA   | n.a.                    | smRNA-FISH    |
| cct2_2       | GAAAGACGGGCATTTTCACC   | n.a.                    | smRNA-FISH    |
| cct2_3       | CAGCAATTGCACCCACAAAC   | n.a.                    | smRNA-FISH    |
| cct2_4       | AGTGCTTTTACCAAATCGC    | n.a.                    | smRNA-FISH    |
| cct2_5       | AATTTTGTCCATTCCCTTAG   | n.a.                    | smRNA-FISH    |
| cct2_6       | GTCACAACAATATCACCCGA   | n.a.                    | smRNA-FISH    |
| cct2_7       | AAGAATGGTAGCACCGTCAT   | n.a.                    | smRNA-FISH    |
| cct2_8       | GCTGCATTATCCAAAGCTAT   | n.a.                    | smRNA-FISH    |
| cct2_9       | CCAACTTCATCATCTTGGAC   | n.a.                    | smRNA-FISH    |
| cct2_10      | GACACACACACTGGTAGTAC   | n.a.                    | smRNA-FISH    |
| cct2_11      | GACGAAGAAGTTCAGCAGCG   | n.a.                    | smRNA-FISH    |
| cct2_12      | GCATTGACCATAATTTCTGC   | n.a.                    | smRNA-FISH    |
| cct2_13      | CGAAGAGCATCGATAGCAGT   | n.a.                    | smRNA-FISH    |
| cct2_14      | TATTCTCGAGGTCACTACGA   | n.a.                    | smRNA-FISH    |
| cct2_15      | GAAGACAGAGTAGTTCTGGC   | n.a.                    | smRNA-FISH    |
| cct2_16      | CCAGCTGAGCAAAATGGTTT   | n.a.                    | smRNA-FISH    |
| cct2_17      | CAAGCGAAGCACTGCATCAA   | n.a.                    | smRNA-FISH    |
| cct2_18      | TGTTATCCAAGTTCGTGCTA   | n.a.                    | smRNA-FISH    |
| cct2_19      | GTTTACCACCAAGGATCTTA   | n.a.                    | smRNA-FISH    |
| cct2_20      | AATCCCTCATCAAGGAAGGA   | n.a.                    | smRNA-FISH    |
| cct2_21      | CTTTGGGACAGTTAACACCA   | n.a.                    | smRNA-FISH    |
| cct2_22      | CCATAGCCGTATTAGCAATT   | n.a.                    | smRNA-FISH    |
| cct2_23      | CCTAGCACCAAAAACCTTC    | n.a.                    | smRNA-FISH    |
| cct2_24      | GTTCAAGTTCGGCAAGCTTG   | n.a.                    | smRNA-FISH    |
| cct2_25      | ACTTTAGCCTTCATTTTCTC   | n.a.                    | smRNA-FISH    |
| cct2_26      | GCTCTGGCCAATTGTAAATG   | n.a.                    | smRNA-FISH    |
| cct2_27      | AATACCAGCGTCAGCGAACA   | n.a.                    | smRNA-FISH    |
| cct2_28      | AGTCTGCATGTTCAATGGAC   | n.a.                    | smRNA-FISH    |
| cct2_29      | CAAAGACAGCCGCTCAATTC   | n.a.                    | smRNA-FISH    |
| cct2_30      | TTGAAGCAATTTACCACCA    | n.a.                    | smRNA-FISH    |
| cct2_31      | TGACAAGTTCAGGATGGTCA   | n.a.                    | smRNA-FISH    |
| cct2_32      | TTCACCGATAATGATCTCCT   | n.a.                    | smRNA-FISH    |
| cct2_33      | GGCTTCAACGCCAGAAAAC    | n.a.                    | smRNA-FISH    |
| cct2_34      | AAACAATGGTGCAGGCTTCT   | n.a.                    | smRNA-FISH    |
| cct2_35      | TAAGTATGAGTGGCACCAC    | n.a.                    | smRNA-FISH    |
| cct2_36      | TCATGAATGGCTCGTTCAGA   | n.a.                    | smRNA-FISH    |
| cct2_37      | CAGCGACTGTTGGGAAAGA    | n.a.                    | smRNA-FISH    |
| cct2_38      | TCCTCCTAAAGTGAAGTACGAG | n.a.                    | smRNA-FISH    |
| cct2_39      | CCATTAGCATTTTCAGCACA   | n.a.                    | smRNA-FISH    |
| cct2_40      | CAGAAACAGCAACTGCCTTC   | n.a.                    | smRNA-FISH    |

|            |                       |      |            |
|------------|-----------------------|------|------------|
| cct2_41    | GTCAAAGCCAGCATTATCAG  | n.a. | smRNA-FISH |
| cct2_42    | AACTGAGCTACTAGCTCACT  | n.a. | smRNA-FISH |
| cct2_43    | GTTGCCATCATAATGAGCTG  | n.a. | smRNA-FISH |
| cct2_44    | CCATATCAAGACCCATTGTA  | n.a. | smRNA-FISH |
| cct2_45    | ATATCAGCAATCTCTCCTTC  | n.a. | smRNA-FISH |
| cct2_46    | TTCAATGCCTCGAGTATACC  | n.a. | smRNA-FISH |
| cct2_47    | AAGTTGAGCACCTTCAGATC  | n.a. | smRNA-FISH |
| cct2_48    | GGTGCAGCCTTTAATATAGT  | n.a. | smRNA-FISH |
| mug93as_1  | TTTATCGGTATGGCAAGGTT  | n.a. | smRNA-FISH |
| mug93as_2  | GCAACCCTTTTCTCATAATC  | n.a. | smRNA-FISH |
| mug93as_3  | ACAGATACACAGCCAACGTG  | n.a. | smRNA-FISH |
| mug93as_4  | TGCCATGAATCGCATATTCA  | n.a. | smRNA-FISH |
| mug93as_5  | AATACTGCCGTTTCTCATAC  | n.a. | smRNA-FISH |
| mug93as_6  | AGACAGTTTTGTGTTGCACA  | n.a. | smRNA-FISH |
| mug93as_7  | TACACAAGTATTGTCCGTC   | n.a. | smRNA-FISH |
| mug93as_8  | ATGAAGACAGTCATCGACCC  | n.a. | smRNA-FISH |
| mug93as_9  | TGTTTGCCATTTTGTTTACC  | n.a. | smRNA-FISH |
| mug93as_10 | AACCTCTATTTTCAGTGCT   | n.a. | smRNA-FISH |
| mug93as_11 | AGGCATTAATAACCGTGTGT  | n.a. | smRNA-FISH |
| mug93as_12 | CCATCGATGCAATCATTGG   | n.a. | smRNA-FISH |
| mug93as_13 | GTATGTTAAGTCAGTCCAGA  | n.a. | smRNA-FISH |
| mug93as_14 | TCCAATCAATTGCTACACA   | n.a. | smRNA-FISH |
| mug93as_15 | GGCATGTTTCCAAAAACCC   | n.a. | smRNA-FISH |
| mug93as_16 | GCAGCTCAAATTCTTTTGCA  | n.a. | smRNA-FISH |
| mug93as_17 | TTCAGTTTTGTCGTGCAACA  | n.a. | smRNA-FISH |
| mug93as_18 | CAAGCAATGGTCCGACAAGG  | n.a. | smRNA-FISH |
| mug93as_19 | TCGGATTGTGTTCAAGGTTT  | n.a. | smRNA-FISH |
| mug93as_20 | ATGGAATGTCGGTTGAGCAG  | n.a. | smRNA-FISH |
| mug93as_21 | TTTCATTTCTATTTCCACA   | n.a. | smRNA-FISH |
| mug93as_22 | CCCCTGTTGTACATTGAAA   | n.a. | smRNA-FISH |
| mug93as_23 | GTACAGATCCAATTACCCAT  | n.a. | smRNA-FISH |
| mug93as_24 | AGAACACTCTCTATTGGTCC  | n.a. | smRNA-FISH |
| mug93as_25 | AGCTCGGAGGACGAATTAGA  | n.a. | smRNA-FISH |
| mug93as_26 | GATACCGAAAATCACTCGCC  | n.a. | smRNA-FISH |
| mug93as_27 | TTTCAGCAATGCGGTCTATG  | n.a. | smRNA-FISH |
| mug93as_28 | TGTGGACAGCAATGCGAACT  | n.a. | smRNA-FISH |
| mug93as_29 | AAGTGCACGACAATTGCCAA  | n.a. | smRNA-FISH |
| mug93as_30 | AATTCGTGGCAAGATCTGGT  | n.a. | smRNA-FISH |
| mug93as_31 | GCAATTACCTGTAGGATTGC  | n.a. | smRNA-FISH |
| mug93as_32 | AGACACCTTAGAGTTGCTTC  | n.a. | smRNA-FISH |
| mug93as_33 | ATGTGCAGAAACATGGCAGT  | n.a. | smRNA-FISH |
| mug93as_34 | TCACTTGAACCTGGACCCAAA | n.a. | smRNA-FISH |
| mug93as_35 | ACTTAGCCAATCGTGATTGG  | n.a. | smRNA-FISH |
| mug93as_36 | TATTTGCGACTTGGACATCC  | n.a. | smRNA-FISH |
| mug93as_37 | GTGATATGGAGGAGAGGACT  | n.a. | smRNA-FISH |
| mug93as_38 | CTTAGTCATCAATCCGTAT   | n.a. | smRNA-FISH |
| mug93as_39 | ACTTATTTTGCATGCAGCTA  | n.a. | smRNA-FISH |
| mug93as_40 | AACATCGTCTGAACCTTTGC  | n.a. | smRNA-FISH |
| mug93as_41 | AGGTTTCAGAGAATCCTTTGG | n.a. | smRNA-FISH |
| mug93as_42 | CTCATTAACCTATTGCGCA   | n.a. | smRNA-FISH |
| mug93as_43 | AACACCATTACACCGGTTTA  | n.a. | smRNA-FISH |
| mug93as_44 | TGTAACGTTTCTAACCTCA   | n.a. | smRNA-FISH |
| mug93as_45 | CACTAGAGGTATGCTCTACT  | n.a. | smRNA-FISH |
| mug93as_46 | CCATCTGATTTGAACCATCT  | n.a. | smRNA-FISH |
| mug93as_47 | TCCAATATTGTTCTACCACA  | n.a. | smRNA-FISH |



|            |                      |      |            |
|------------|----------------------|------|------------|
| mug93as_48 | CACATGGTTATGATATGCCT | n.a. | smRNA-FISH |
|------------|----------------------|------|------------|

n.a. : not applicable

#### Supplemental Table S4. Antibodies used in this study

| Application                                  | Antibody                                     |
|----------------------------------------------|----------------------------------------------|
| IF - $\alpha$ tubulin                        | mouse monoclonal Tat1, Keith Gull            |
| IF Rrp6-MYC                                  | mouse monoclonal #9E10 Thermo Fisher         |
| IF Dis3-HA                                   | mouse monoclonal #12CA5 Sigma-Aldrich        |
| IF Gar2-GFP                                  | rabbit polyclonal #A11122, Life Technologies |
| ChIP RNA Pol II (ser2P)                      | rabbit polyclonal #ab5095 ChIP-grade, abcam  |
| ChIP anti-HA                                 | Monoclonal 16B12 (anti-HA.11, Covance)       |
| ChIP anti-PK                                 | Monoclonal anti-PK (V5) Abd Serotec MCA1360  |
| Chromosome spreads anti-Brn1-HA <sub>6</sub> | Monoclonal 16B12 (anti-HA.11, Covance)       |

Table S5. Microarray analysis G1-arrested cells

| id   | tx_ID  | seqName | strand | first   | last    | type  | name             | mappedType     | source    | Brn1_repea<br>t01 | Brn1_rep<br>eat02 | Brn1_rep<br>eat03 | Brn1(TEV)_<br>repeat01 | Brn1(TEV)_<br>repeat02 | Brn1(TEV)_<br>repeat03 | average<br>Brn1 | average<br>Brn1(TEV) | logRatio |
|------|--------|---------|--------|---------|---------|-------|------------------|----------------|-----------|-------------------|-------------------|-------------------|------------------------|------------------------|------------------------|-----------------|----------------------|----------|
| 5902 | ST5902 | 12      | -      | 248597  | 249757  | ORF-T | YLR054C          | bothEndsMapped | Manual    | -3.48117          | -2.59869          | -2.09485          | -5.08599               | -5.03483               | -5.04824               | -2.34677        | -5.04154             | -2.69477 |
| 4501 | ST4501 | 5       | -      | 52349   | 52485   | CUTs  | CUT544           | mapped3        | Automatic | -4.43256          | -3.21128          | -4.46924          | -5.30533               | -7.65787               | -5.12852               | -3.84026        | -6.39319             | -2.55293 |
| 151  | ST0151 | 2       | +      | 407335  | 410687  | ORF-T | YBR083W          | bothEndsMapped | Manual    | 0.16666           | 0.53404           | -4.84896          | -0.51932               | -4.52882               | -4.72394               | -2.15746        | -4.62638             | -2.46892 |
| 2138 | ST2138 | 12      | +      | 105401  | 105545  | CUTs  | CUT247           | mapped3        | Automatic | -5.83515          | -5.87913          | -3.45310          | -6.19907               | -8.21444               | -4.83796               | -4.66612        | -6.52620             | -1.86008 |
| 6627 | ST6627 | 14      | -      | 777520  | 779200  | ORF-T | YNR074C          | bothEndsMapped | Manual    | -3.08368          | -2.43884          | -1.02514          | -1.83930               | -2.45676               | -4.04674               | -1.73199        | -3.25175             | -1.51976 |
| 3450 | ST3450 | 16      | +      | 404243  | 404419  | SUTs  | SUT407           | bothEndsMapped | Manual    | -5.54183          | -3.48487          | -3.54037          | -3.15808               | -5.31097               | -4.52692               | -3.51262        | -4.91895             | -1.40633 |
| 5202 | ST5202 | 8       | -      | 386606  | 386734  | CUTs  | CUT651           | mapped3        | Automatic | -5.29801          | -4.13431          | -4.71461          | -6.09072               | -5.04489               | -6.31474               | -4.42446        | -5.67981             | -1.25535 |
| 5197 | ST5197 | 8       | -      | 378126  | 379886  | ORF-T | YHR139C          | bothEndsMapped | Manual    | -5.14519          | -3.55026          | -3.84973          | -4.74112               | -4.43079               | -5.39266               | -3.70000        | -4.91173             | -1.21173 |
| 2492 | ST2492 | 13      | +      | 239025  | 239225  | CUTs  | CUT290           | mapped3        | Automatic | -5.31997          | -3.11358          | -5.14433          | -6.00678               | -5.04016               | -5.48125               | -4.12896        | -5.26070             | -1.13175 |
| 60   | ST0060 | 2       | +      | 88041   | 88393   | other | snR56            | bothEndsMapped | Manual    | -4.47023          | -3.18247          | -4.27987          | -4.60533               | -4.54478               | -5.16834               | -3.73117        | -4.85656             | -1.12539 |
| 3110 | ST3110 | 15      | +      | 408138  | 408218  | SUTs  | SUT363           | bothEndsMapped | Manual    | -3.46131          | -4.57276          | -3.95585          | -5.75668               | -5.93836               | -4.82969               | -4.26431        | -5.38403             | -1.11972 |
| 6221 | ST6221 | 13      | -      | 302549  | 302669  | CUTs  | CUT765           | mapped5        | Automatic | -7.02135          | -3.68532          | -4.98378          | -5.93715               | -5.60098               | -5.29123               | -4.33455        | -5.44610             | -1.11155 |
| 5536 | ST5536 | 10      | -      | 471068  | 471820  | ORF-T | YJR025C          | bothEndsMapped | Manual    | -1.24334          | -0.35086          | -0.47191          | -2.76667               | -1.39686               | -1.60625               | -0.41139        | -1.50156             | -1.09017 |
| 3983 | ST3983 | 3       | -      | 178254  | 178478  | CUTs  | CUT466           | mapped5        | Automatic | -3.98834          | -5.01892          | -5.04601          | -6.06312               | -6.05792               | -6.15247               | -5.03246        | -6.10519             | -1.07273 |
| 579  | ST0579 | 4       | +      | 791956  | 792108  | CUTs  | CUT070           | bothEndsMapped | Automatic | -6.16314          | -4.48993          | -3.56240          | -5.02902               | -4.95319               | -5.15140               | -4.02617        | -5.05229             | -1.02613 |
| 3123 | ST3123 | 15      | +      | 435778  | 437386  | CUTs  | CUT376           | mapped5        | Automatic | -5.25013          | -5.27972          | -4.93013          | -5.01997               | -4.09493               | -4.04544               | -5.10492        | -4.07018             | 1.03474  |
| 1643 | ST1643 | 9       | +      | 281153  | 281257  | SUTs  | SUT185           | bothEndsMapped | Manual    | -4.88930          | -5.13821          | -4.99639          | -4.53378               | -4.60989               | -3.45173               | -5.06730        | -4.03081             | 1.03649  |
| 5190 | ST5190 | 8       | -      | 364917  | 365365  | other | YHR130C, YHR131C | bothEndsMapped | Manual    | -3.86027          | -3.20706          | -2.65851          | -4.53919               | -1.97958               | -1.57231               | -2.93278        | -1.77595             | 1.15684  |
| 3248 | ST3248 | 15      | +      | 832339  | 832579  | other | snR8             | bothEndsMapped | Manual    | -0.47182          | -2.33819          | 0.37779           | -1.43998               | 0.25944                | 0.27726                | -0.98020        | 0.26835              | 1.24855  |
| 6839 | ST6839 | 15      | -      | 680566  | 680998  | other | snR36            | bothEndsMapped | Manual    | -5.59490          | -5.29085          | -2.63283          | -5.40163               | -2.54971               | -2.79757               | -3.96184        | -2.67364             | 1.28820  |
| 1954 | ST1954 | 11      | +      | 158572  | 159388  | ORF-T | YKL156W          | bothEndsMapped | Manual    | -2.25683          | -2.85398          | 0.25548           | -3.69957               | 0.27613                | -0.14455               | -1.29925        | 0.06579              | 1.36504  |
| 2658 | ST2658 | 13      | +      | 731449  | 731553  | SUTs  | SUT313           | bothEndsMapped | Manual    | -5.65329          | -5.83973          | -6.45297          | -6.03445               | -4.64537               | -4.79716               | -6.14635        | -4.72127             | 1.42508  |
| 761  | ST0761 | 4       | +      | 1401693 | 1402677 | ORF-T | YDR471W          | bothEndsMapped | Manual    | -0.84753          | -3.47101          | 0.70359           | -3.82080               | 0.60799                | 0.61579                | -1.38371        | 0.61189              | 1.99560  |
| 3679 | ST3679 | 1       | -      | 199979  | 200419  | CUTs  | CUT442           | bothEndsMapped | Automatic | -8.81809          | -3.38971          | -6.80481          | -6.61112               | -4.18029               | -1.69331               | -5.09726        | -2.93680             | 2.16046  |
| 6293 | ST6293 | 13      | -      | 550109  | 551245  | ORF-T | YMR142C          | bothEndsMapped | Manual    | -4.31482          | -3.79717          | -3.54892          | -1.04337               | 0.75528                | -3.64919               | -3.67304        | -1.44695             | 2.22609  |
| 1911 | ST1911 | 11      | +      | 15881   | 16201   | CUTs  | CUT224           | mapped3        | Automatic | -2.37283          | -8.27058          | -7.37420          | -5.44901               | -6.21772               | -3.00349               | -7.82239        | -4.61060             | 3.21179  |

**Table S5. Microarrays analysis nocodazole-arrested cells**

| id   | tx_ID  | seqName | strand | first   | last    | type  | name      | mappedType     | source | Brn1_repea<br>t01 | Brn1_repea<br>t02 | Brn1(TEV)_re<br>peat01 | Brn1(TEV)_rep<br>eat02 | average Brn1 | average<br>Brn1(TEV) | logRatio |
|------|--------|---------|--------|---------|---------|-------|-----------|----------------|--------|-------------------|-------------------|------------------------|------------------------|--------------|----------------------|----------|
| 4413 | ST4413 | 4       | -      | 1319401 | 1319889 | ORF-T | YDR424C   | bothEndsMapped | Manual | -0.23110          | -0.21460          | -3.16806               | -0.01457               | -0.22285     | -1.59131             | -1.36846 |
| 5671 | ST5671 | 11      | -      | 179104  | 179464  | SUTs  | SUT662    | bothEndsMapped | Manual | -0.48974          | -3.06247          | -2.87663               | -2.89802               | -1.77610     | -2.88732             | -1.11122 |
| 2088 | ST2088 | 11      | +      | 554500  | 556036  | ORF-T | YKR059W   | bothEndsMapped | Manual | -0.44989          | -0.05571          | -0.42022               | -2.19590               | -0.25280     | -1.30806             | -1.05527 |
| 2970 | ST2970 | 14      | +      | 779124  | 781267  | ORF-T | YNR075W   | bothEndsMapped | Manual | -1.97764          | -3.21846          | -1.58373               | -1.51300               | -2.59805     | -1.54836             | 1.04969  |
| 4957 | ST4957 | 7       | -      | 735287  | 736026  | other | YGR122C-A | bothEndsMapped | Manual | -2.77460          | -1.14738          | -0.55634               | -0.79321               | -1.96099     | -0.67477             | 1.28622  |
| 6753 | ST6753 | 15      | -      | 407822  | 408126  | other | snR9      | bothEndsMapped | Manual | 0.95456           | -1.43922          | 0.89781                | 1.47876                | -0.24233     | 1.18829              | 1.43062  |
